# Supplementary material for: Convolutional Neural Networks That Identify Mosquito Species and Know When They Do Not Know
Source: Research Square preprint supplement (doi:10.21203/rs.3.rs-275109/v1), 2021-03-12
Supplement: Supplementary file 2 [file e098b40e5b60d388bfafb899.csv]

	Id	F1-TierI	F1s0	F1s1	F1s2	F1s3	F1s4	F2-TierI	F2s0	F2s1	F2s2	F2s3	F2s4	F3-TierI	F3s0	F3s1	F3s2	F3s3	F3s4	F4-TierI	F4s0	F4s1	F4s2	F4s3	F4s4	F5-TierI	F5s0	F5s1	F5s2	F5s3	F5s4
0	/opt/ImageBase/AWS_sync/cropped/aedes/aegypti/JHU-000536_01m.jpg	Train							U2 test	N	N	U2 test	U2 test	Train						Train	train	train	train	train	train	Train
1	/opt/ImageBase/AWS_sync/cropped/aedes/aegypti/JHU-000536_05m.jpg	Train							U2 test	N	N	U2 test	U2 test	Train						Train	train	train	train	train	train	Train
2	/opt/ImageBase/AWS_sync/cropped/aedes/aegypti/JHU-000536_03m.jpg	Train							U2 test	N	N	U2 test	U2 test	Train						Train	train	train	train	train	train	Train
3	/opt/ImageBase/AWS_sync/cropped/aedes/aegypti/JHU-000536_04m.jpg	Train							U2 test	N	N	U2 test	U2 test	Train						Train	train	train	train	train	train	Train
4	/opt/ImageBase/AWS_sync/cropped/aedes/aegypti/JHU-000536_02m.jpg	Train							U2 test	N	N	U2 test	U2 test	Train						Train	train	train	train	train	train	Train
5	/opt/ImageBase/AWS_sync/cropped/aedes/aegypti/JHU-000578_04m.jpg	Train							U2 test	N	N	U2 test	U2 test	Train						Train						Train	train	train	train	train	train
6	/opt/ImageBase/AWS_sync/cropped/aedes/aegypti/JHU-000578_01m.jpg	Train							U2 test	N	N	U2 test	U2 test	Train						Train						Train	train	train	train	train	train
7	/opt/ImageBase/AWS_sync/cropped/aedes/aegypti/JHU-000578_02m.jpg	Train							U2 test	N	N	U2 test	U2 test	Train						Train						Train	train	train	train	train	train
8	/opt/ImageBase/AWS_sync/cropped/aedes/aegypti/JHU-000578_05m.jpg	Train							U2 test	N	N	U2 test	U2 test	Train						Train						Train	train	train	train	train	train
9	/opt/ImageBase/AWS_sync/cropped/aedes/aegypti/JHU-000578_03m.jpg	Train							U2 test	N	N	U2 test	U2 test	Train						Train						Train	train	train	train	train	train
10	/opt/ImageBase/AWS_sync/cropped/aedes/aegypti/JHU-005979_03m.jpg	Train							U2 test	N	N	U2 test	U2 test	Train						Train						Train
11	/opt/ImageBase/AWS_sync/cropped/aedes/aegypti/JHU-005979_02m.jpg	Train							U2 test	N	N	U2 test	U2 test	Train						Train						Train
12	/opt/ImageBase/AWS_sync/cropped/aedes/aegypti/JHU-005979_04m.jpg	Train							U2 test	N	N	U2 test	U2 test	Train						Train						Train
13	/opt/ImageBase/AWS_sync/cropped/aedes/aegypti/JHU-005979_05m.jpg	Train							U2 test	N	N	U2 test	U2 test	Train						Train						Train
14	/opt/ImageBase/AWS_sync/cropped/aedes/aegypti/JHU-005979_01m.jpg	Train							U2 test	N	N	U2 test	U2 test	Train						Train						Train
15	/opt/ImageBase/AWS_sync/cropped/aedes/aegypti/JHU-000611_01m.jpg	Train							U2 test	N	N	U2 test	U2 test	Train						Train						Train
16	/opt/ImageBase/AWS_sync/cropped/aedes/aegypti/JHU-000611_04m.jpg	Train							U2 test	N	N	U2 test	U2 test	Train						Train						Train
17	/opt/ImageBase/AWS_sync/cropped/aedes/aegypti/JHU-000611_03m.jpg	Train							U2 test	N	N	U2 test	U2 test	Train						Train						Train
18	/opt/ImageBase/AWS_sync/cropped/aedes/aegypti/JHU-000611_05m.jpg	Train							U2 test	N	N	U2 test	U2 test	Train						Train						Train
19	/opt/ImageBase/AWS_sync/cropped/aedes/aegypti/JHU-000611_02m.jpg	Train							U2 test	N	N	U2 test	U2 test	Train						Train						Train
20	/opt/ImageBase/AWS_sync/cropped/aedes/aegypti/JHU-000552_03m.jpg	Train							U2 test	N	N	U2 test	U2 test	Train						Train						Train
21	/opt/ImageBase/AWS_sync/cropped/aedes/aegypti/JHU-000552_04m.jpg	Train							U2 test	N	N	U2 test	U2 test	Train						Train						Train
22	/opt/ImageBase/AWS_sync/cropped/aedes/aegypti/JHU-000552_02m.jpg	Train							U2 test	N	N	U2 test	U2 test	Train						Train						Train
23	/opt/ImageBase/AWS_sync/cropped/aedes/aegypti/JHU-000552_05m.jpg	Train							U2 test	N	N	U2 test	U2 test	Train						Train						Train
24	/opt/ImageBase/AWS_sync/cropped/aedes/aegypti/JHU-000552_01m.jpg	Train							U2 test	N	N	U2 test	U2 test	Train						Train						Train
25	/opt/ImageBase/AWS_sync/cropped/aedes/aegypti/JHU-000535_03m.jpg	Train							U2 test	N	N	U2 test	U2 test	Train	train	train	train	train	train	Train						Train
26	/opt/ImageBase/AWS_sync/cropped/aedes/aegypti/JHU-000535_01m.jpg	Train							U2 test	N	N	U2 test	U2 test	Train	train	train	train	train	train	Train						Train
27	/opt/ImageBase/AWS_sync/cropped/aedes/aegypti/JHU-000535_04m.jpg	Train							U2 test	N	N	U2 test	U2 test	Train	train	train	train	train	train	Train						Train
28	/opt/ImageBase/AWS_sync/cropped/aedes/aegypti/JHU-000535_02m.jpg	Train							U2 test	N	N	U2 test	U2 test	Train	train	train	train	train	train	Train						Train
29	/opt/ImageBase/AWS_sync/cropped/aedes/aegypti/JHU-007500_01m.jpg	Train							U2 test	N	N	U2 test	U2 test	Train						Train						Train
30	/opt/ImageBase/AWS_sync/cropped/aedes/aegypti/JHU-007500_03m.jpg	Train							U2 test	N	N	U2 test	U2 test	Train						Train						Train
31	/opt/ImageBase/AWS_sync/cropped/aedes/aegypti/JHU-007500_02m.jpg	Train							U2 test	N	N	U2 test	U2 test	Train						Train						Train
32	/opt/ImageBase/AWS_sync/cropped/aedes/aegypti/JHU-005884_04m.jpg	Train							U2 test	N	N	U2 test	U2 test	Train						Train						Train
33	/opt/ImageBase/AWS_sync/cropped/aedes/aegypti/JHU-005884_02m.jpg	Train							U2 test	N	N	U2 test	U2 test	Train						Train						Train
34	/opt/ImageBase/AWS_sync/cropped/aedes/aegypti/JHU-005884_01m.jpg	Train							U2 test	N	N	U2 test	U2 test	Train						Train						Train
35	/opt/ImageBase/AWS_sync/cropped/aedes/aegypti/JHU-005884_05m.jpg	Train							U2 test	N	N	U2 test	U2 test	Train						Train						Train
36	/opt/ImageBase/AWS_sync/cropped/aedes/aegypti/JHU-005884_03m.jpg	Train							U2 test	N	N	U2 test	U2 test	Train						Train						Train
37	/opt/ImageBase/AWS_sync/cropped/aedes/aegypti/JHU-005962_02m.jpg	Train							U2 test	N	N	U2 test	U2 test	Train						Train						Train
38	/opt/ImageBase/AWS_sync/cropped/aedes/aegypti/JHU-005962_01m.jpg	Train							U2 test	N	N	U2 test	U2 test	Train						Train						Train
39	/opt/ImageBase/AWS_sync/cropped/aedes/aegypti/JHU-005962_03m.jpg	Train							U2 test	N	N	U2 test	U2 test	Train						Train						Train
40	/opt/ImageBase/AWS_sync/cropped/aedes/aegypti/JHU-005962_04m.jpg	Train							U2 test	N	N	U2 test	U2 test	Train						Train						Train
41	/opt/ImageBase/AWS_sync/cropped/aedes/aegypti/JHU-001849_01m.jpg	Train							U2 test	N	N	U2 test	U2 test	Train						Train	train	train	train	train	train	Train
42	/opt/ImageBase/AWS_sync/cropped/aedes/aegypti/JHU-001849_02m.jpg	Train							U2 test	N	N	U2 test	U2 test	Train						Train	train	train	train	train	train	Train
43	/opt/ImageBase/AWS_sync/cropped/aedes/aegypti/JHU-001849_03m.jpg	Train							U2 test	N	N	U2 test	U2 test	Train						Train	train	train	train	train	train	Train
44	/opt/ImageBase/AWS_sync/cropped/aedes/aegypti/JHU-001849_05m.jpg	Train							U2 test	N	N	U2 test	U2 test	Train						Train	train	train	train	train	train	Train
45	/opt/ImageBase/AWS_sync/cropped/aedes/aegypti/JHU-001849_04m.jpg	Train							U2 test	N	N	U2 test	U2 test	Train						Train	train	train	train	train	train	Train
46	/opt/ImageBase/AWS_sync/cropped/aedes/aegypti/JHU-001859_01m.jpg	Train							U2 test	N	N	U2 test	U2 test	Train						Train						Train
47	/opt/ImageBase/AWS_sync/cropped/aedes/aegypti/JHU-001859_04m.jpg	Train							U2 test	N	N	U2 test	U2 test	Train						Train						Train
48	/opt/ImageBase/AWS_sync/cropped/aedes/aegypti/JHU-001859_02m.jpg	Train							U2 test	N	N	U2 test	U2 test	Train						Train						Train
49	/opt/ImageBase/AWS_sync/cropped/aedes/aegypti/JHU-001859_03m.jpg	Train							U2 test	N	N	U2 test	U2 test	Train						Train						Train
50	/opt/ImageBase/AWS_sync/cropped/aedes/aegypti/JHU-000625_03m.jpg	Train							U2 test	N	N	U2 test	U2 test	Train						Train	train	train	train	train	train	Train	train	train	train	train	train
51	/opt/ImageBase/AWS_sync/cropped/aedes/aegypti/JHU-000625_01m.jpg	Train							U2 test	N	N	U2 test	U2 test	Train						Train	train	train	train	train	train	Train	train	train	train	train	train
52	/opt/ImageBase/AWS_sync/cropped/aedes/aegypti/JHU-000625_02m.jpg	Train							U2 test	N	N	U2 test	U2 test	Train						Train	train	train	train	train	train	Train	train	train	train	train	train
53	/opt/ImageBase/AWS_sync/cropped/aedes/aegypti/JHU-000625_04m.jpg	Train							U2 test	N	N	U2 test	U2 test	Train						Train	train	train	train	train	train	Train	train	train	train	train	train
54	/opt/ImageBase/AWS_sync/cropped/aedes/aegypti/JHU-000625_05m.jpg	Train							U2 test	N	N	U2 test	U2 test	Train						Train	train	train	train	train	train	Train	train	train	train	train	train
55	/opt/ImageBase/AWS_sync/cropped/aedes/aegypti/JHU-000574_04m.jpg	Train							U2 test	N	N	U2 test	U2 test	Train						Train						Train
56	/opt/ImageBase/AWS_sync/cropped/aedes/aegypti/JHU-000574_03m.jpg	Train							U2 test	N	N	U2 test	U2 test	Train						Train						Train
57	/opt/ImageBase/AWS_sync/cropped/aedes/aegypti/JHU-000574_02m.jpg	Train							U2 test	N	N	U2 test	U2 test	Train						Train						Train
58	/opt/ImageBase/AWS_sync/cropped/aedes/aegypti/JHU-000574_01m.jpg	Train							U2 test	N	N	U2 test	U2 test	Train						Train						Train
59	/opt/ImageBase/AWS_sync/cropped/aedes/aegypti/JHU-001869_04m.jpg	Train							U2 test	N	N	U2 test	U2 test	Train						Train						Train	train	K test	train	train	train
60	/opt/ImageBase/AWS_sync/cropped/aedes/aegypti/JHU-001869_05m.jpg	Train							U2 test	N	N	U2 test	U2 test	Train						Train						Train	train	K test	train	train	train
61	/opt/ImageBase/AWS_sync/cropped/aedes/aegypti/JHU-001869_03m.jpg	Train							U2 test	N	N	U2 test	U2 test	Train						Train						Train	train	K test	train	train	train
62	/opt/ImageBase/AWS_sync/cropped/aedes/aegypti/JHU-001869_02m.jpg	Train							U2 test	N	N	U2 test	U2 test	Train						Train						Train	train	K test	train	train	train
63	/opt/ImageBase/AWS_sync/cropped/aedes/aegypti/JHU-001869_01m.jpg	Train							U2 test	N	N	U2 test	U2 test	Train						Train						Train	train	K test	train	train	train
64	/opt/ImageBase/AWS_sync/cropped/aedes/aegypti/JHU-001856_04m.jpg	Train							U2 test	N	N	U2 test	U2 test	Train						Train						Train
65	/opt/ImageBase/AWS_sync/cropped/aedes/aegypti/JHU-001856_03m.jpg	Train							U2 test	N	N	U2 test	U2 test	Train						Train						Train
66	/opt/ImageBase/AWS_sync/cropped/aedes/aegypti/JHU-001856_02m.jpg	Train							U2 test	N	N	U2 test	U2 test	Train						Train						Train
67	/opt/ImageBase/AWS_sync/cropped/aedes/aegypti/JHU-001856_05m.jpg	Train							U2 test	N	N	U2 test	U2 test	Train						Train						Train
68	/opt/ImageBase/AWS_sync/cropped/aedes/aegypti/JHU-001856_01m.jpg	Train							U2 test	N	N	U2 test	U2 test	Train						Train						Train
69	/opt/ImageBase/AWS_sync/cropped/aedes/aegypti/JHU-000623_04m.jpg	Train							U2 test	N	N	U2 test	U2 test	Train						Train						Train
70	/opt/ImageBase/AWS_sync/cropped/aedes/aegypti/JHU-000623_06m.jpg	Train							U2 test	N	N	U2 test	U2 test	Train						Train						Train
71	/opt/ImageBase/AWS_sync/cropped/aedes/aegypti/JHU-000623_02m.jpg	Train							U2 test	N	N	U2 test	U2 test	Train						Train						Train
72	/opt/ImageBase/AWS_sync/cropped/aedes/aegypti/JHU-000623_01m.jpg	Train							U2 test	N	N	U2 test	U2 test	Train						Train						Train
73	/opt/ImageBase/AWS_sync/cropped/aedes/aegypti/JHU-000623_03m.jpg	Train							U2 test	N	N	U2 test	U2 test	Train						Train						Train
74	/opt/ImageBase/AWS_sync/cropped/aedes/aegypti/JHU-000623_05m.jpg	Train							U2 test	N	N	U2 test	U2 test	Train						Train						Train
75	/opt/ImageBase/AWS_sync/cropped/aedes/aegypti/JHU-005816_02m.jpg	Train							U2 test	N	N	U2 test	U2 test	Train	train	train	train	train	train	Train	train	train	train	train	train	Train
76	/opt/ImageBase/AWS_sync/cropped/aedes/aegypti/JHU-005816_04m.jpg	Train							U2 test	N	N	U2 test	U2 test	Train	train	train	train	train	train	Train	train	train	train	train	train	Train
77	/opt/ImageBase/AWS_sync/cropped/aedes/aegypti/JHU-005816_01m.jpg	Train							U2 test	N	N	U2 test	U2 test	Train	train	train	train	train	train	Train	train	train	train	train	train	Train
78	/opt/ImageBase/AWS_sync/cropped/aedes/aegypti/JHU-005816_03m.jpg	Train							U2 test	N	N	U2 test	U2 test	Train	train	train	train	train	train	Train	train	train	train	train	train	Train
79	/opt/ImageBase/AWS_sync/cropped/aedes/aegypti/JHU-000554_04m.jpg	Train							U2 test	N	N	U2 test	U2 test	Train						Train						Train
80	/opt/ImageBase/AWS_sync/cropped/aedes/aegypti/JHU-000554_02m.jpg	Train							U2 test	N	N	U2 test	U2 test	Train						Train						Train
81	/opt/ImageBase/AWS_sync/cropped/aedes/aegypti/JHU-000554_01m.jpg	Train							U2 test	N	N	U2 test	U2 test	Train						Train						Train
82	/opt/ImageBase/AWS_sync/cropped/aedes/aegypti/JHU-000554_03m.jpg	Train							U2 test	N	N	U2 test	U2 test	Train						Train						Train
83	/opt/ImageBase/AWS_sync/cropped/aedes/aegypti/JHU-000586_04m.jpg	Train							U2 test	N	N	U2 test	U2 test	Train						Train						Train
84	/opt/ImageBase/AWS_sync/cropped/aedes/aegypti/JHU-000586_02m.jpg	Train							U2 test	N	N	U2 test	U2 test	Train						Train						Train
85	/opt/ImageBase/AWS_sync/cropped/aedes/aegypti/JHU-000586_03m.jpg	Train							U2 test	N	N	U2 test	U2 test	Train						Train						Train
86	/opt/ImageBase/AWS_sync/cropped/aedes/aegypti/JHU-000586_01m.jpg	Train							U2 test	N	N	U2 test	U2 test	Train						Train						Train
87	/opt/ImageBase/AWS_sync/cropped/aedes/aegypti/JHU-000586_05m.jpg	Train							U2 test	N	N	U2 test	U2 test	Train						Train						Train
88	/opt/ImageBase/AWS_sync/cropped/aedes/aegypti/JHU-005966_03m.jpg	Train							U2 test	N	N	U2 test	U2 test	Train						Train						Train
89	/opt/ImageBase/AWS_sync/cropped/aedes/aegypti/JHU-005966_04m.jpg	Train							U2 test	N	N	U2 test	U2 test	Train						Train						Train
90	/opt/ImageBase/AWS_sync/cropped/aedes/aegypti/JHU-005966_02m.jpg	Train							U2 test	N	N	U2 test	U2 test	Train						Train						Train
91	/opt/ImageBase/AWS_sync/cropped/aedes/aegypti/JHU-005966_01m.jpg	Train							U2 test	N	N	U2 test	U2 test	Train						Train						Train
92	/opt/ImageBase/AWS_sync/cropped/aedes/aegypti/JHU-005851_03m.jpg	Train							U2 test	N	N	U2 test	U2 test	Train						Train						Train
93	/opt/ImageBase/AWS_sync/cropped/aedes/aegypti/JHU-005851_02m.jpg	Train							U2 test	N	N	U2 test	U2 test	Train						Train						Train
94	/opt/ImageBase/AWS_sync/cropped/aedes/aegypti/JHU-005851_01m.jpg	Train							U2 test	N	N	U2 test	U2 test	Train						Train						Train
95	/opt/ImageBase/AWS_sync/cropped/aedes/aegypti/JHU-005851_04m.jpg	Train							U2 test	N	N	U2 test	U2 test	Train						Train						Train
96	/opt/ImageBase/AWS_sync/cropped/aedes/aegypti/JHU-005851_05m.jpg	Train							U2 test	N	N	U2 test	U2 test	Train						Train						Train
97	/opt/ImageBase/AWS_sync/cropped/aedes/aegypti/JHU-000555_03m.jpg	Train							U2 test	N	N	U2 test	U2 test	Train						Train						Train
98	/opt/ImageBase/AWS_sync/cropped/aedes/aegypti/JHU-000555_02m.jpg	Train							U2 test	N	N	U2 test	U2 test	Train						Train						Train
99	/opt/ImageBase/AWS_sync/cropped/aedes/aegypti/JHU-000555_05m.jpg	Train							U2 test	N	N	U2 test	U2 test	Train						Train						Train
100	/opt/ImageBase/AWS_sync/cropped/aedes/aegypti/JHU-000555_04m.jpg	Train							U2 test	N	N	U2 test	U2 test	Train						Train						Train
101	/opt/ImageBase/AWS_sync/cropped/aedes/aegypti/JHU-000555_01m.jpg	Train							U2 test	N	N	U2 test	U2 test	Train						Train						Train
102	/opt/ImageBase/AWS_sync/cropped/aedes/aegypti/JHU-001863_01m.jpg	Train							U2 test	N	N	U2 test	U2 test	Train						Train						Train
103	/opt/ImageBase/AWS_sync/cropped/aedes/aegypti/JHU-001863_04m.jpg	Train							U2 test	N	N	U2 test	U2 test	Train						Train						Train
104	/opt/ImageBase/AWS_sync/cropped/aedes/aegypti/JHU-001863_02m.jpg	Train							U2 test	N	N	U2 test	U2 test	Train						Train						Train
105	/opt/ImageBase/AWS_sync/cropped/aedes/aegypti/JHU-001863_05m.jpg	Train							U2 test	N	N	U2 test	U2 test	Train						Train						Train
106	/opt/ImageBase/AWS_sync/cropped/aedes/aegypti/JHU-001863_03m.jpg	Train							U2 test	N	N	U2 test	U2 test	Train						Train						Train
107	/opt/ImageBase/AWS_sync/cropped/aedes/aegypti/JHU-007501_02m.jpg	Train							U2 test	N	N	U2 test	U2 test	Train						Train						Train
108	/opt/ImageBase/AWS_sync/cropped/aedes/aegypti/JHU-007501_01m.jpg	Train							U2 test	N	N	U2 test	U2 test	Train						Train						Train
109	/opt/ImageBase/AWS_sync/cropped/aedes/aegypti/JHU-005959_04m.jpg	Train							U2 test	N	N	U2 test	U2 test	Train						Train						Train
110	/opt/ImageBase/AWS_sync/cropped/aedes/aegypti/JHU-005959_03m.jpg	Train							U2 test	N	N	U2 test	U2 test	Train						Train						Train
111	/opt/ImageBase/AWS_sync/cropped/aedes/aegypti/JHU-005959_01m.jpg	Train							U2 test	N	N	U2 test	U2 test	Train						Train						Train
112	/opt/ImageBase/AWS_sync/cropped/aedes/aegypti/JHU-005959_02m.jpg	Train							U2 test	N	N	U2 test	U2 test	Train						Train						Train
113	/opt/ImageBase/AWS_sync/cropped/aedes/aegypti/JHU-000599_04m.jpg	Train							U2 test	N	N	U2 test	U2 test	Train	train	train	train	train	train	Train						Train
114	/opt/ImageBase/AWS_sync/cropped/aedes/aegypti/JHU-000599_02m.jpg	Train							U2 test	N	N	U2 test	U2 test	Train	train	train	train	train	train	Train						Train
115	/opt/ImageBase/AWS_sync/cropped/aedes/aegypti/JHU-000599_01m.jpg	Train							U2 test	N	N	U2 test	U2 test	Train	train	train	train	train	train	Train						Train
116	/opt/ImageBase/AWS_sync/cropped/aedes/aegypti/JHU-000599_03m.jpg	Train							U2 test	N	N	U2 test	U2 test	Train	train	train	train	train	train	Train						Train
117	/opt/ImageBase/AWS_sync/cropped/aedes/aegypti/JHU-007511_03m.jpg	Train							U2 test	N	N	U2 test	U2 test	Train						Train						Train	train	K test	train	train	train
118	/opt/ImageBase/AWS_sync/cropped/aedes/aegypti/JHU-007511_01m.jpg	Train							U2 test	N	N	U2 test	U2 test	Train						Train						Train	train	K test	train	train	train
119	/opt/ImageBase/AWS_sync/cropped/aedes/aegypti/JHU-007511_02m.jpg	Train							U2 test	N	N	U2 test	U2 test	Train						Train						Train	train	K test	train	train	train
120	/opt/ImageBase/AWS_sync/cropped/aedes/aegypti/JHU-001855_04m.jpg	Train							U2 test	N	N	U2 test	U2 test	Train						Train						Train
121	/opt/ImageBase/AWS_sync/cropped/aedes/aegypti/JHU-001855_02m.jpg	Train							U2 test	N	N	U2 test	U2 test	Train						Train						Train
122	/opt/ImageBase/AWS_sync/cropped/aedes/aegypti/JHU-001855_05m.jpg	Train							U2 test	N	N	U2 test	U2 test	Train						Train						Train
123	/opt/ImageBase/AWS_sync/cropped/aedes/aegypti/JHU-001855_01m.jpg	Train							U2 test	N	N	U2 test	U2 test	Train						Train						Train
124	/opt/ImageBase/AWS_sync/cropped/aedes/aegypti/JHU-001855_03m.jpg	Train							U2 test	N	N	U2 test	U2 test	Train						Train						Train
125	/opt/ImageBase/AWS_sync/cropped/aedes/aegypti/JHU-001868_05m.jpg	Train							U2 test	N	N	U2 test	U2 test	Train						Train	K test	K test	K test	K test	K test	Train
126	/opt/ImageBase/AWS_sync/cropped/aedes/aegypti/JHU-001868_02m.jpg	Train							U2 test	N	N	U2 test	U2 test	Train						Train	K test	K test	K test	K test	K test	Train
127	/opt/ImageBase/AWS_sync/cropped/aedes/aegypti/JHU-001868_01m.jpg	Train							U2 test	N	N	U2 test	U2 test	Train						Train	K test	K test	K test	K test	K test	Train
128	/opt/ImageBase/AWS_sync/cropped/aedes/aegypti/JHU-001868_03m.jpg	Train							U2 test	N	N	U2 test	U2 test	Train						Train	K test	K test	K test	K test	K test	Train
129	/opt/ImageBase/AWS_sync/cropped/aedes/aegypti/JHU-001868_04m.jpg	Train							U2 test	N	N	U2 test	U2 test	Train						Train	K test	K test	K test	K test	K test	Train
130	/opt/ImageBase/AWS_sync/cropped/aedes/aegypti/JHU-000656_05m.jpg	Train							U2 test	N	N	U2 test	U2 test	Train						Train	train	train	train	train	train	Train
131	/opt/ImageBase/AWS_sync/cropped/aedes/aegypti/JHU-000656_04m.jpg	Train							U2 test	N	N	U2 test	U2 test	Train						Train	train	train	train	train	train	Train
132	/opt/ImageBase/AWS_sync/cropped/aedes/aegypti/JHU-000656_02m.jpg	Train							U2 test	N	N	U2 test	U2 test	Train						Train	train	train	train	train	train	Train
133	/opt/ImageBase/AWS_sync/cropped/aedes/aegypti/JHU-000656_01m.jpg	Train							U2 test	N	N	U2 test	U2 test	Train						Train	train	train	train	train	train	Train
134	/opt/ImageBase/AWS_sync/cropped/aedes/aegypti/JHU-000656_03m.jpg	Train							U2 test	N	N	U2 test	U2 test	Train						Train	train	train	train	train	train	Train
135	/opt/ImageBase/AWS_sync/cropped/aedes/aegypti/JHU-000589_01m.jpg	Train							U2 test	N	N	U2 test	U2 test	Train						Train						Train	train	train	train	train	train
136	/opt/ImageBase/AWS_sync/cropped/aedes/aegypti/JHU-000589_02m.jpg	Train							U2 test	N	N	U2 test	U2 test	Train						Train						Train	train	train	train	train	train
137	/opt/ImageBase/AWS_sync/cropped/aedes/aegypti/JHU-000589_03m.jpg	Train							U2 test	N	N	U2 test	U2 test	Train						Train						Train	train	train	train	train	train
138	/opt/ImageBase/AWS_sync/cropped/aedes/aegypti/JHU-000589_04m.jpg	Train							U2 test	N	N	U2 test	U2 test	Train						Train						Train	train	train	train	train	train
139	/opt/ImageBase/AWS_sync/cropped/aedes/aegypti/JHU-000544_02m.jpg	Train							U2 test	N	N	U2 test	U2 test	Train						Train						Train
140	/opt/ImageBase/AWS_sync/cropped/aedes/aegypti/JHU-000544_03m.jpg	Train							U2 test	N	N	U2 test	U2 test	Train						Train						Train
141	/opt/ImageBase/AWS_sync/cropped/aedes/aegypti/JHU-000544_01m.jpg	Train							U2 test	N	N	U2 test	U2 test	Train						Train						Train
142	/opt/ImageBase/AWS_sync/cropped/aedes/aegypti/JHU-000544_04m.jpg	Train							U2 test	N	N	U2 test	U2 test	Train						Train						Train
143	/opt/ImageBase/AWS_sync/cropped/aedes/aegypti/JHU-000593_01m.jpg	Train							U2 test	N	N	U2 test	U2 test	Train						Train						Train
144	/opt/ImageBase/AWS_sync/cropped/aedes/aegypti/JHU-000593_04m.jpg	Train							U2 test	N	N	U2 test	U2 test	Train						Train						Train
145	/opt/ImageBase/AWS_sync/cropped/aedes/aegypti/JHU-000593_05m.jpg	Train							U2 test	N	N	U2 test	U2 test	Train						Train						Train
146	/opt/ImageBase/AWS_sync/cropped/aedes/aegypti/JHU-000593_02m.jpg	Train							U2 test	N	N	U2 test	U2 test	Train						Train						Train
147	/opt/ImageBase/AWS_sync/cropped/aedes/aegypti/JHU-000593_03m.jpg	Train							U2 test	N	N	U2 test	U2 test	Train						Train						Train
148	/opt/ImageBase/AWS_sync/cropped/aedes/aegypti/JHU-005854_03m.jpg	Train							U2 test	N	N	U2 test	U2 test	Train						Train						Train
149	/opt/ImageBase/AWS_sync/cropped/aedes/aegypti/JHU-005854_01m.jpg	Train							U2 test	N	N	U2 test	U2 test	Train						Train						Train
150	/opt/ImageBase/AWS_sync/cropped/aedes/aegypti/JHU-005854_04m.jpg	Train							U2 test	N	N	U2 test	U2 test	Train						Train						Train
151	/opt/ImageBase/AWS_sync/cropped/aedes/aegypti/JHU-005854_02m.jpg	Train							U2 test	N	N	U2 test	U2 test	Train						Train						Train
152	/opt/ImageBase/AWS_sync/cropped/aedes/aegypti/JHU-007496_01m.jpg	Train							U2 test	N	N	U2 test	U2 test	Train	train	K test	K test	K test	train	Train						Train	K test	K test	K test	K test	K test
153	/opt/ImageBase/AWS_sync/cropped/aedes/aegypti/JHU-007496_02m.jpg	Train							U2 test	N	N	U2 test	U2 test	Train	train	K test	K test	K test	train	Train						Train	K test	K test	K test	K test	K test
154	/opt/ImageBase/AWS_sync/cropped/aedes/aegypti/JHU-007496_03m.jpg	Train							U2 test	N	N	U2 test	U2 test	Train	train	K test	K test	K test	train	Train						Train	K test	K test	K test	K test	K test
155	/opt/ImageBase/AWS_sync/cropped/aedes/aegypti/JHU-000561_02m.jpg	Train							U2 test	N	N	U2 test	U2 test	Train						Train						Train
156	/opt/ImageBase/AWS_sync/cropped/aedes/aegypti/JHU-000561_01m.jpg	Train							U2 test	N	N	U2 test	U2 test	Train						Train						Train
157	/opt/ImageBase/AWS_sync/cropped/aedes/aegypti/JHU-000561_05m.jpg	Train							U2 test	N	N	U2 test	U2 test	Train						Train						Train
158	/opt/ImageBase/AWS_sync/cropped/aedes/aegypti/JHU-000561_04m.jpg	Train							U2 test	N	N	U2 test	U2 test	Train						Train						Train
159	/opt/ImageBase/AWS_sync/cropped/aedes/aegypti/JHU-000561_03m.jpg	Train							U2 test	N	N	U2 test	U2 test	Train						Train						Train
160	/opt/ImageBase/AWS_sync/cropped/aedes/aegypti/JHU-000614_02m.jpg	Train							U2 test	N	N	U2 test	U2 test	Train						Train						Train
161	/opt/ImageBase/AWS_sync/cropped/aedes/aegypti/JHU-000614_03m.jpg	Train							U2 test	N	N	U2 test	U2 test	Train						Train						Train
162	/opt/ImageBase/AWS_sync/cropped/aedes/aegypti/JHU-000614_04m.jpg	Train							U2 test	N	N	U2 test	U2 test	Train						Train						Train
163	/opt/ImageBase/AWS_sync/cropped/aedes/aegypti/JHU-000614_01m.jpg	Train							U2 test	N	N	U2 test	U2 test	Train						Train						Train
164	/opt/ImageBase/AWS_sync/cropped/aedes/aegypti/JHU-000587_02m.jpg	Train							U2 test	N	N	U2 test	U2 test	Train	K test	K test	K test	K test	K test	Train						Train	train	train	train	train	train
165	/opt/ImageBase/AWS_sync/cropped/aedes/aegypti/JHU-000587_03m.jpg	Train							U2 test	N	N	U2 test	U2 test	Train	K test	K test	K test	K test	K test	Train						Train	train	train	train	train	train
166	/opt/ImageBase/AWS_sync/cropped/aedes/aegypti/JHU-000587_01m.jpg	Train							U2 test	N	N	U2 test	U2 test	Train	K test	K test	K test	K test	K test	Train						Train	train	train	train	train	train
167	/opt/ImageBase/AWS_sync/cropped/aedes/aegypti/JHU-000587_04m.jpg	Train							U2 test	N	N	U2 test	U2 test	Train	K test	K test	K test	K test	K test	Train						Train	train	train	train	train	train
168	/opt/ImageBase/AWS_sync/cropped/aedes/aegypti/JHU-000581_01m.jpg	Train							U2 test	N	N	U2 test	U2 test	Train						Train						Train
169	/opt/ImageBase/AWS_sync/cropped/aedes/aegypti/JHU-000581_04m.jpg	Train							U2 test	N	N	U2 test	U2 test	Train						Train						Train
170	/opt/ImageBase/AWS_sync/cropped/aedes/aegypti/JHU-000581_02m.jpg	Train							U2 test	N	N	U2 test	U2 test	Train						Train						Train
171	/opt/ImageBase/AWS_sync/cropped/aedes/aegypti/JHU-000581_03m.jpg	Train							U2 test	N	N	U2 test	U2 test	Train						Train						Train
172	/opt/ImageBase/AWS_sync/cropped/aedes/aegypti/JHU-000581_05m.jpg	Train							U2 test	N	N	U2 test	U2 test	Train						Train						Train
173	/opt/ImageBase/AWS_sync/cropped/aedes/aegypti/JHU-000612_03m.jpg	Train							train	N	N	train	train	Train						Train						Train
174	/opt/ImageBase/AWS_sync/cropped/aedes/aegypti/JHU-000612_01m.jpg	Train							train	N	N	train	train	Train						Train						Train
175	/opt/ImageBase/AWS_sync/cropped/aedes/aegypti/JHU-000612_02m.jpg	Train							train	N	N	train	train	Train						Train						Train
176	/opt/ImageBase/AWS_sync/cropped/aedes/aegypti/JHU-000612_04m.jpg	Train							train	N	N	train	train	Train						Train						Train
177	/opt/ImageBase/AWS_sync/cropped/aedes/aegypti/JHU-000542_01m.jpg	Train							train	N	N	train	train	Train						Train						Train
178	/opt/ImageBase/AWS_sync/cropped/aedes/aegypti/JHU-000542_05m.jpg	Train							train	N	N	train	train	Train						Train						Train
179	/opt/ImageBase/AWS_sync/cropped/aedes/aegypti/JHU-000542_02m.jpg	Train							train	N	N	train	train	Train						Train						Train
180	/opt/ImageBase/AWS_sync/cropped/aedes/aegypti/JHU-000542_04m.jpg	Train							train	N	N	train	train	Train						Train						Train
181	/opt/ImageBase/AWS_sync/cropped/aedes/aegypti/JHU-000542_03m.jpg	Train							train	N	N	train	train	Train						Train						Train
182	/opt/ImageBase/AWS_sync/cropped/aedes/aegypti/JHU-000559_02m.jpg	Train							U2 test	N	N	U2 test	U2 test	Train						Train						Train	train	train	train	train	train
183	/opt/ImageBase/AWS_sync/cropped/aedes/aegypti/JHU-000559_01m.jpg	Train							U2 test	N	N	U2 test	U2 test	Train						Train						Train	train	train	train	train	train
184	/opt/ImageBase/AWS_sync/cropped/aedes/aegypti/JHU-000559_04m.jpg	Train							U2 test	N	N	U2 test	U2 test	Train						Train						Train	train	train	train	train	train
185	/opt/ImageBase/AWS_sync/cropped/aedes/aegypti/JHU-000559_03m.jpg	Train							U2 test	N	N	U2 test	U2 test	Train						Train						Train	train	train	train	train	train
186	/opt/ImageBase/AWS_sync/cropped/aedes/aegypti/JHU-000559_05m.jpg	Train							U2 test	N	N	U2 test	U2 test	Train						Train						Train	train	train	train	train	train
187	/opt/ImageBase/AWS_sync/cropped/aedes/aegypti/JHU-000597_05m.jpg	Train							U2 test	N	N	U2 test	U2 test	Train						Train	train	train	train	train	train	Train
188	/opt/ImageBase/AWS_sync/cropped/aedes/aegypti/JHU-000597_02m.jpg	Train							U2 test	N	N	U2 test	U2 test	Train						Train	train	train	train	train	train	Train
189	/opt/ImageBase/AWS_sync/cropped/aedes/aegypti/JHU-000597_03m.jpg	Train							U2 test	N	N	U2 test	U2 test	Train						Train	train	train	train	train	train	Train
190	/opt/ImageBase/AWS_sync/cropped/aedes/aegypti/JHU-000597_06m.jpg	Train							U2 test	N	N	U2 test	U2 test	Train						Train	train	train	train	train	train	Train
191	/opt/ImageBase/AWS_sync/cropped/aedes/aegypti/JHU-000597_04m.jpg	Train							U2 test	N	N	U2 test	U2 test	Train						Train	train	train	train	train	train	Train
192	/opt/ImageBase/AWS_sync/cropped/aedes/aegypti/JHU-000597_01m.jpg	Train							U2 test	N	N	U2 test	U2 test	Train						Train	train	train	train	train	train	Train
193	/opt/ImageBase/AWS_sync/cropped/aedes/aegypti/JHU-005915_03m.jpg	Train							U2 test	N	N	U2 test	U2 test	Train	train	train	train	train	train	Train						Train
194	/opt/ImageBase/AWS_sync/cropped/aedes/aegypti/JHU-005915_01m.jpg	Train							U2 test	N	N	U2 test	U2 test	Train	train	train	train	train	train	Train						Train
195	/opt/ImageBase/AWS_sync/cropped/aedes/aegypti/JHU-005915_02m.jpg	Train							U2 test	N	N	U2 test	U2 test	Train	train	train	train	train	train	Train						Train
196	/opt/ImageBase/AWS_sync/cropped/aedes/aegypti/JHU-005915_05m.jpg	Train							U2 test	N	N	U2 test	U2 test	Train	train	train	train	train	train	Train						Train
197	/opt/ImageBase/AWS_sync/cropped/aedes/aegypti/JHU-005915_04m.jpg	Train							U2 test	N	N	U2 test	U2 test	Train	train	train	train	train	train	Train						Train
198	/opt/ImageBase/AWS_sync/cropped/aedes/aegypti/JHU-005849_02m.jpg	Train							U2 test	N	N	U2 test	U2 test	Train						Train						Train
199	/opt/ImageBase/AWS_sync/cropped/aedes/aegypti/JHU-005849_04m.jpg	Train							U2 test	N	N	U2 test	U2 test	Train						Train						Train
200	/opt/ImageBase/AWS_sync/cropped/aedes/aegypti/JHU-005849_03m.jpg	Train							U2 test	N	N	U2 test	U2 test	Train						Train						Train
201	/opt/ImageBase/AWS_sync/cropped/aedes/aegypti/JHU-005849_01m.jpg	Train							U2 test	N	N	U2 test	U2 test	Train						Train						Train
202	/opt/ImageBase/AWS_sync/cropped/aedes/aegypti/JHU-005849_05m.jpg	Train							U2 test	N	N	U2 test	U2 test	Train						Train						Train
203	/opt/ImageBase/AWS_sync/cropped/aedes/aegypti/JHU-001917_02m.jpg	Train							U2 test	N	N	U2 test	U2 test	Train						Train						Train	train	train	train	train	train
204	/opt/ImageBase/AWS_sync/cropped/aedes/aegypti/JHU-001917_03m.jpg	Train							U2 test	N	N	U2 test	U2 test	Train						Train						Train	train	train	train	train	train
205	/opt/ImageBase/AWS_sync/cropped/aedes/aegypti/JHU-001917_01m.jpg	Train							U2 test	N	N	U2 test	U2 test	Train						Train						Train	train	train	train	train	train
206	/opt/ImageBase/AWS_sync/cropped/aedes/aegypti/JHU-001917_05m.jpg	Train							U2 test	N	N	U2 test	U2 test	Train						Train						Train	train	train	train	train	train
207	/opt/ImageBase/AWS_sync/cropped/aedes/aegypti/JHU-001917_04m.jpg	Train							U2 test	N	N	U2 test	U2 test	Train						Train						Train	train	train	train	train	train
208	/opt/ImageBase/AWS_sync/cropped/aedes/aegypti/JHU-001850_04m.jpg	Train							U2 test	N	N	U2 test	U2 test	Train						Train						Train	train	train	train	train	train
209	/opt/ImageBase/AWS_sync/cropped/aedes/aegypti/JHU-001850_01m.jpg	Train							U2 test	N	N	U2 test	U2 test	Train						Train						Train	train	train	train	train	train
210	/opt/ImageBase/AWS_sync/cropped/aedes/aegypti/JHU-001850_03m.jpg	Train							U2 test	N	N	U2 test	U2 test	Train						Train						Train	train	train	train	train	train
211	/opt/ImageBase/AWS_sync/cropped/aedes/aegypti/JHU-001850_02m.jpg	Train							U2 test	N	N	U2 test	U2 test	Train						Train						Train	train	train	train	train	train
212	/opt/ImageBase/AWS_sync/cropped/aedes/aegypti/JHU-000602_02m.jpg	Train							U2 test	N	N	U2 test	U2 test	Train						Train						Train
213	/opt/ImageBase/AWS_sync/cropped/aedes/aegypti/JHU-000602_03m.jpg	Train							U2 test	N	N	U2 test	U2 test	Train						Train						Train
214	/opt/ImageBase/AWS_sync/cropped/aedes/aegypti/JHU-000602_04m.jpg	Train							U2 test	N	N	U2 test	U2 test	Train						Train						Train
215	/opt/ImageBase/AWS_sync/cropped/aedes/aegypti/JHU-000602_01m.jpg	Train							U2 test	N	N	U2 test	U2 test	Train						Train						Train
216	/opt/ImageBase/AWS_sync/cropped/aedes/aegypti/JHU-005989_02m.jpg	Train							U2 test	N	N	U2 test	U2 test	Train						Train	train	train	train	train	train	Train
217	/opt/ImageBase/AWS_sync/cropped/aedes/aegypti/JHU-005989_03m.jpg	Train							U2 test	N	N	U2 test	U2 test	Train						Train	train	train	train	train	train	Train
218	/opt/ImageBase/AWS_sync/cropped/aedes/aegypti/JHU-005989_05m.jpg	Train							U2 test	N	N	U2 test	U2 test	Train						Train	train	train	train	train	train	Train
219	/opt/ImageBase/AWS_sync/cropped/aedes/aegypti/JHU-005989_01m.jpg	Train							U2 test	N	N	U2 test	U2 test	Train						Train	train	train	train	train	train	Train
220	/opt/ImageBase/AWS_sync/cropped/aedes/aegypti/JHU-005989_04m.jpg	Train							U2 test	N	N	U2 test	U2 test	Train						Train	train	train	train	train	train	Train
221	/opt/ImageBase/AWS_sync/cropped/aedes/aegypti/JHU-001844_04m.jpg	Train							U2 test	N	N	U2 test	U2 test	Train						Train						Train
222	/opt/ImageBase/AWS_sync/cropped/aedes/aegypti/JHU-001844_05m.jpg	Train							U2 test	N	N	U2 test	U2 test	Train						Train						Train
223	/opt/ImageBase/AWS_sync/cropped/aedes/aegypti/JHU-001844_01m.jpg	Train							U2 test	N	N	U2 test	U2 test	Train						Train						Train
224	/opt/ImageBase/AWS_sync/cropped/aedes/aegypti/JHU-001844_02m.jpg	Train							U2 test	N	N	U2 test	U2 test	Train						Train						Train
225	/opt/ImageBase/AWS_sync/cropped/aedes/aegypti/JHU-001844_06m.jpg	Train							U2 test	N	N	U2 test	U2 test	Train						Train						Train
226	/opt/ImageBase/AWS_sync/cropped/aedes/aegypti/JHU-001844_03m.jpg	Train							U2 test	N	N	U2 test	U2 test	Train						Train						Train
227	/opt/ImageBase/AWS_sync/cropped/aedes/aegypti/JHU-001861_04m.jpg	Train							U2 test	N	N	U2 test	U2 test	Train						Train						Train
228	/opt/ImageBase/AWS_sync/cropped/aedes/aegypti/JHU-001861_02m.jpg	Train							U2 test	N	N	U2 test	U2 test	Train						Train						Train
229	/opt/ImageBase/AWS_sync/cropped/aedes/aegypti/JHU-001861_01m.jpg	Train							U2 test	N	N	U2 test	U2 test	Train						Train						Train
230	/opt/ImageBase/AWS_sync/cropped/aedes/aegypti/JHU-001861_03m.jpg	Train							U2 test	N	N	U2 test	U2 test	Train						Train						Train
231	/opt/ImageBase/AWS_sync/cropped/aedes/aegypti/JHU-000590_03m.jpg	Train							U2 test	N	N	U2 test	U2 test	Train						Train						Train
232	/opt/ImageBase/AWS_sync/cropped/aedes/aegypti/JHU-000590_01m.jpg	Train							U2 test	N	N	U2 test	U2 test	Train						Train						Train
233	/opt/ImageBase/AWS_sync/cropped/aedes/aegypti/JHU-000590_04m.jpg	Train							U2 test	N	N	U2 test	U2 test	Train						Train						Train
234	/opt/ImageBase/AWS_sync/cropped/aedes/aegypti/JHU-000590_02m.jpg	Train							U2 test	N	N	U2 test	U2 test	Train						Train						Train
235	/opt/ImageBase/AWS_sync/cropped/aedes/aegypti/JHU-005972_02m.jpg	Train							U2 test	N	N	U2 test	U2 test	Train						Train						Train
236	/opt/ImageBase/AWS_sync/cropped/aedes/aegypti/JHU-005972_01m.jpg	Train							U2 test	N	N	U2 test	U2 test	Train						Train						Train
237	/opt/ImageBase/AWS_sync/cropped/aedes/aegypti/JHU-005972_03m.jpg	Train							U2 test	N	N	U2 test	U2 test	Train						Train						Train
238	/opt/ImageBase/AWS_sync/cropped/aedes/aegypti/JHU-005972_04m.jpg	Train							U2 test	N	N	U2 test	U2 test	Train						Train						Train
239	/opt/ImageBase/AWS_sync/cropped/aedes/aegypti/JHU-005897_02m.jpg	Train							U2 test	N	N	U2 test	U2 test	Train						Train						Train
240	/opt/ImageBase/AWS_sync/cropped/aedes/aegypti/JHU-005897_03m.jpg	Train							U2 test	N	N	U2 test	U2 test	Train						Train						Train
241	/opt/ImageBase/AWS_sync/cropped/aedes/aegypti/JHU-005897_04m.jpg	Train							U2 test	N	N	U2 test	U2 test	Train						Train						Train
242	/opt/ImageBase/AWS_sync/cropped/aedes/aegypti/JHU-005897_01m.jpg	Train							U2 test	N	N	U2 test	U2 test	Train						Train						Train
243	/opt/ImageBase/AWS_sync/cropped/aedes/aegypti/JHU-005897_05m.jpg	Train							U2 test	N	N	U2 test	U2 test	Train						Train						Train
244	/opt/ImageBase/AWS_sync/cropped/aedes/aegypti/JHU-005897_06m.jpg	Train							U2 test	N	N	U2 test	U2 test	Train						Train						Train
245	/opt/ImageBase/AWS_sync/cropped/aedes/aegypti/JHU-000585_04m.jpg	Train							U2 test	N	N	U2 test	U2 test	Train						Train						Train
246	/opt/ImageBase/AWS_sync/cropped/aedes/aegypti/JHU-000585_01m.jpg	Train							U2 test	N	N	U2 test	U2 test	Train						Train						Train
247	/opt/ImageBase/AWS_sync/cropped/aedes/aegypti/JHU-000585_03m.jpg	Train							U2 test	N	N	U2 test	U2 test	Train						Train						Train
248	/opt/ImageBase/AWS_sync/cropped/aedes/aegypti/JHU-000585_02m.jpg	Train							U2 test	N	N	U2 test	U2 test	Train						Train						Train
249	/opt/ImageBase/AWS_sync/cropped/aedes/aegypti/JHU-000627_03m.jpg	Train							U2 test	N	N	U2 test	U2 test	Train	train	train	train	train	train	Train						Train
250	/opt/ImageBase/AWS_sync/cropped/aedes/aegypti/JHU-000627_06m.jpg	Train							U2 test	N	N	U2 test	U2 test	Train	train	train	train	train	train	Train						Train
251	/opt/ImageBase/AWS_sync/cropped/aedes/aegypti/JHU-000627_04m.jpg	Train							U2 test	N	N	U2 test	U2 test	Train	train	train	train	train	train	Train						Train
252	/opt/ImageBase/AWS_sync/cropped/aedes/aegypti/JHU-000627_01m.jpg	Train							U2 test	N	N	U2 test	U2 test	Train	train	train	train	train	train	Train						Train
253	/opt/ImageBase/AWS_sync/cropped/aedes/aegypti/JHU-000627_05m.jpg	Train							U2 test	N	N	U2 test	U2 test	Train	train	train	train	train	train	Train						Train
254	/opt/ImageBase/AWS_sync/cropped/aedes/aegypti/JHU-000627_02m.jpg	Train							U2 test	N	N	U2 test	U2 test	Train	train	train	train	train	train	Train						Train
255	/opt/ImageBase/AWS_sync/cropped/aedes/aegypti/JHU-007498_02m.jpg	Train							U2 test	N	N	U2 test	U2 test	Train						Train	K test	K test	K test	K test	K test	Train
256	/opt/ImageBase/AWS_sync/cropped/aedes/aegypti/JHU-007498_03m.jpg	Train							U2 test	N	N	U2 test	U2 test	Train						Train	K test	K test	K test	K test	K test	Train
257	/opt/ImageBase/AWS_sync/cropped/aedes/aegypti/JHU-007498_01m.jpg	Train							U2 test	N	N	U2 test	U2 test	Train						Train	K test	K test	K test	K test	K test	Train
258	/opt/ImageBase/AWS_sync/cropped/aedes/aegypti/JHU-000540_02m.jpg	Train							U2 test	N	N	U2 test	U2 test	Train						Train						Train
259	/opt/ImageBase/AWS_sync/cropped/aedes/aegypti/JHU-000540_01m.jpg	Train							U2 test	N	N	U2 test	U2 test	Train						Train						Train
260	/opt/ImageBase/AWS_sync/cropped/aedes/aegypti/JHU-000540_05m.jpg	Train							U2 test	N	N	U2 test	U2 test	Train						Train						Train
261	/opt/ImageBase/AWS_sync/cropped/aedes/aegypti/JHU-000540_03m.jpg	Train							U2 test	N	N	U2 test	U2 test	Train						Train						Train
262	/opt/ImageBase/AWS_sync/cropped/aedes/aegypti/JHU-000540_04m.jpg	Train							U2 test	N	N	U2 test	U2 test	Train						Train						Train
263	/opt/ImageBase/AWS_sync/cropped/aedes/aegypti/JHU-001853_03m.jpg	Train							U2 test	N	N	U2 test	U2 test	Train						Train						Train
264	/opt/ImageBase/AWS_sync/cropped/aedes/aegypti/JHU-001853_04m.jpg	Train							U2 test	N	N	U2 test	U2 test	Train						Train						Train
265	/opt/ImageBase/AWS_sync/cropped/aedes/aegypti/JHU-001853_05m.jpg	Train							U2 test	N	N	U2 test	U2 test	Train						Train						Train
266	/opt/ImageBase/AWS_sync/cropped/aedes/aegypti/JHU-001853_02m.jpg	Train							U2 test	N	N	U2 test	U2 test	Train						Train						Train
267	/opt/ImageBase/AWS_sync/cropped/aedes/aegypti/JHU-001853_01m.jpg	Train							U2 test	N	N	U2 test	U2 test	Train						Train						Train
268	/opt/ImageBase/AWS_sync/cropped/aedes/aegypti/JHU-000604_03m.jpg	Train							U2 test	N	N	U2 test	U2 test	Train						Train						Train
269	/opt/ImageBase/AWS_sync/cropped/aedes/aegypti/JHU-000604_04m.jpg	Train							U2 test	N	N	U2 test	U2 test	Train						Train						Train
270	/opt/ImageBase/AWS_sync/cropped/aedes/aegypti/JHU-000604_01m.jpg	Train							U2 test	N	N	U2 test	U2 test	Train						Train						Train
271	/opt/ImageBase/AWS_sync/cropped/aedes/aegypti/JHU-000604_02m.jpg	Train							U2 test	N	N	U2 test	U2 test	Train						Train						Train
272	/opt/ImageBase/AWS_sync/cropped/aedes/aegypti/JHU-000556_04m.jpg	Train							U2 test	N	N	U2 test	U2 test	Train						Train						Train
273	/opt/ImageBase/AWS_sync/cropped/aedes/aegypti/JHU-000556_02m.jpg	Train							U2 test	N	N	U2 test	U2 test	Train						Train						Train
274	/opt/ImageBase/AWS_sync/cropped/aedes/aegypti/JHU-000556_03m.jpg	Train							U2 test	N	N	U2 test	U2 test	Train						Train						Train
275	/opt/ImageBase/AWS_sync/cropped/aedes/aegypti/JHU-000556_01m.jpg	Train							U2 test	N	N	U2 test	U2 test	Train						Train						Train
276	/opt/ImageBase/AWS_sync/cropped/aedes/aegypti/JHU-000565_02m.jpg	Train							U2 test	N	N	U2 test	U2 test	Train						Train						Train
277	/opt/ImageBase/AWS_sync/cropped/aedes/aegypti/JHU-000565_03m.jpg	Train							U2 test	N	N	U2 test	U2 test	Train						Train						Train
278	/opt/ImageBase/AWS_sync/cropped/aedes/aegypti/JHU-000565_04m.jpg	Train							U2 test	N	N	U2 test	U2 test	Train						Train						Train
279	/opt/ImageBase/AWS_sync/cropped/aedes/aegypti/JHU-000565_05m.jpg	Train							U2 test	N	N	U2 test	U2 test	Train						Train						Train
280	/opt/ImageBase/AWS_sync/cropped/aedes/aegypti/JHU-000565_01m.jpg	Train							U2 test	N	N	U2 test	U2 test	Train						Train						Train
281	/opt/ImageBase/AWS_sync/cropped/aedes/aegypti/JHU-001870_01m.jpg	Train							U2 test	N	N	U2 test	U2 test	Train	train	train	train	train	train	Train	train	K test	train	K test	K test	Train
282	/opt/ImageBase/AWS_sync/cropped/aedes/aegypti/JHU-001870_03m.jpg	Train							U2 test	N	N	U2 test	U2 test	Train	train	train	train	train	train	Train	train	K test	train	K test	K test	Train
283	/opt/ImageBase/AWS_sync/cropped/aedes/aegypti/JHU-001870_05m.jpg	Train							U2 test	N	N	U2 test	U2 test	Train	train	train	train	train	train	Train	train	K test	train	K test	K test	Train
284	/opt/ImageBase/AWS_sync/cropped/aedes/aegypti/JHU-001870_02m.jpg	Train							U2 test	N	N	U2 test	U2 test	Train	train	train	train	train	train	Train	train	K test	train	K test	K test	Train
285	/opt/ImageBase/AWS_sync/cropped/aedes/aegypti/JHU-001870_04m.jpg	Train							U2 test	N	N	U2 test	U2 test	Train	train	train	train	train	train	Train	train	K test	train	K test	K test	Train
286	/opt/ImageBase/AWS_sync/cropped/aedes/aegypti/JHU-000598_03m.jpg	Train							U2 test	N	N	U2 test	U2 test	Train						Train						Train	K test	K test	K test	K test	K test
287	/opt/ImageBase/AWS_sync/cropped/aedes/aegypti/JHU-000598_01m.jpg	Train							U2 test	N	N	U2 test	U2 test	Train						Train						Train	K test	K test	K test	K test	K test
288	/opt/ImageBase/AWS_sync/cropped/aedes/aegypti/JHU-000598_04m.jpg	Train							U2 test	N	N	U2 test	U2 test	Train						Train						Train	K test	K test	K test	K test	K test
289	/opt/ImageBase/AWS_sync/cropped/aedes/aegypti/JHU-000598_02m.jpg	Train							U2 test	N	N	U2 test	U2 test	Train						Train						Train	K test	K test	K test	K test	K test
290	/opt/ImageBase/AWS_sync/cropped/aedes/aegypti/JHU-005988_03m.jpg	Train							U2 test	N	N	U2 test	U2 test	Train						Train						Train	train	train	train	train	train
291	/opt/ImageBase/AWS_sync/cropped/aedes/aegypti/JHU-005988_01m.jpg	Train							U2 test	N	N	U2 test	U2 test	Train						Train						Train	train	train	train	train	train
292	/opt/ImageBase/AWS_sync/cropped/aedes/aegypti/JHU-005988_04m.jpg	Train							U2 test	N	N	U2 test	U2 test	Train						Train						Train	train	train	train	train	train
293	/opt/ImageBase/AWS_sync/cropped/aedes/aegypti/JHU-005988_02m.jpg	Train							U2 test	N	N	U2 test	U2 test	Train						Train						Train	train	train	train	train	train
294	/opt/ImageBase/AWS_sync/cropped/aedes/aegypti/JHU-000550_01m.jpg	Train							U2 test	N	N	U2 test	U2 test	Train						Train						Train
295	/opt/ImageBase/AWS_sync/cropped/aedes/aegypti/JHU-000550_02m.jpg	Train							U2 test	N	N	U2 test	U2 test	Train						Train						Train
296	/opt/ImageBase/AWS_sync/cropped/aedes/aegypti/JHU-000550_04m.jpg	Train							U2 test	N	N	U2 test	U2 test	Train						Train						Train
297	/opt/ImageBase/AWS_sync/cropped/aedes/aegypti/JHU-000550_03m.jpg	Train							U2 test	N	N	U2 test	U2 test	Train						Train						Train
298	/opt/ImageBase/AWS_sync/cropped/aedes/aegypti/JHU-005994_02m.jpg	Train							train	N	N	train	train	Train						Train						Train
299	/opt/ImageBase/AWS_sync/cropped/aedes/aegypti/JHU-005994_03m.jpg	Train							train	N	N	train	train	Train						Train						Train
300	/opt/ImageBase/AWS_sync/cropped/aedes/aegypti/JHU-005994_04m.jpg	Train							train	N	N	train	train	Train						Train						Train
301	/opt/ImageBase/AWS_sync/cropped/aedes/aegypti/JHU-005994_01m.jpg	Train							train	N	N	train	train	Train						Train						Train
302	/opt/ImageBase/AWS_sync/cropped/aedes/aegypti/JHU-005883_02m.jpg	Train							train	N	N	train	train	Train						Train						Train
303	/opt/ImageBase/AWS_sync/cropped/aedes/aegypti/JHU-005883_04m.jpg	Train							train	N	N	train	train	Train						Train						Train
304	/opt/ImageBase/AWS_sync/cropped/aedes/aegypti/JHU-005883_03m.jpg	Train							train	N	N	train	train	Train						Train						Train
305	/opt/ImageBase/AWS_sync/cropped/aedes/aegypti/JHU-005883_01m.jpg	Train							train	N	N	train	train	Train						Train						Train
306	/opt/ImageBase/AWS_sync/cropped/aedes/aegypti/JHU-005996_02m.jpg	Train							U2 test	N	N	U2 test	U2 test	Train						Train						Train
307	/opt/ImageBase/AWS_sync/cropped/aedes/aegypti/JHU-005996_04m.jpg	Train							U2 test	N	N	U2 test	U2 test	Train						Train						Train
308	/opt/ImageBase/AWS_sync/cropped/aedes/aegypti/JHU-005996_03m.jpg	Train							U2 test	N	N	U2 test	U2 test	Train						Train						Train
309	/opt/ImageBase/AWS_sync/cropped/aedes/aegypti/JHU-005996_01m.jpg	Train							U2 test	N	N	U2 test	U2 test	Train						Train						Train
310	/opt/ImageBase/AWS_sync/cropped/aedes/aegypti/JHU-000545_03m.jpg	Train							U2 test	N	N	U2 test	U2 test	Train	K test	K test	K test	K test	K test	Train						Train
311	/opt/ImageBase/AWS_sync/cropped/aedes/aegypti/JHU-000545_05m.jpg	Train							U2 test	N	N	U2 test	U2 test	Train	K test	K test	K test	K test	K test	Train						Train
312	/opt/ImageBase/AWS_sync/cropped/aedes/aegypti/JHU-000545_01m.jpg	Train							U2 test	N	N	U2 test	U2 test	Train	K test	K test	K test	K test	K test	Train						Train
313	/opt/ImageBase/AWS_sync/cropped/aedes/aegypti/JHU-000545_04m.jpg	Train							U2 test	N	N	U2 test	U2 test	Train	K test	K test	K test	K test	K test	Train						Train
314	/opt/ImageBase/AWS_sync/cropped/aedes/aegypti/JHU-000545_02m.jpg	Train							U2 test	N	N	U2 test	U2 test	Train	K test	K test	K test	K test	K test	Train						Train
315	/opt/ImageBase/AWS_sync/cropped/aedes/aegypti/JHU-000622_04m.jpg	Train							U2 test	N	N	train	train	Train						Train						Train
316	/opt/ImageBase/AWS_sync/cropped/aedes/aegypti/JHU-000622_03m.jpg	Train							U2 test	N	N	train	train	Train						Train						Train
317	/opt/ImageBase/AWS_sync/cropped/aedes/aegypti/JHU-000622_02m.jpg	Train							U2 test	N	N	train	train	Train						Train						Train
318	/opt/ImageBase/AWS_sync/cropped/aedes/aegypti/JHU-000622_01m.jpg	Train							U2 test	N	N	train	train	Train						Train						Train
319	/opt/ImageBase/AWS_sync/cropped/aedes/aegypti/JHU-000534_01m.jpg	Train							U2 test	N	N	U2 test	U2 test	Train	train	train	train	train	train	Train						Train
320	/opt/ImageBase/AWS_sync/cropped/aedes/aegypti/JHU-000534_03m.jpg	Train							U2 test	N	N	U2 test	U2 test	Train	train	train	train	train	train	Train						Train
321	/opt/ImageBase/AWS_sync/cropped/aedes/aegypti/JHU-000534_05m.jpg	Train							U2 test	N	N	U2 test	U2 test	Train	train	train	train	train	train	Train						Train
322	/opt/ImageBase/AWS_sync/cropped/aedes/aegypti/JHU-000534_02m.jpg	Train							U2 test	N	N	U2 test	U2 test	Train	train	train	train	train	train	Train						Train
323	/opt/ImageBase/AWS_sync/cropped/aedes/aegypti/JHU-000534_04m.jpg	Train							U2 test	N	N	U2 test	U2 test	Train	train	train	train	train	train	Train						Train
324	/opt/ImageBase/AWS_sync/cropped/aedes/aegypti/JHU-000568_03m.jpg	Train							U2 test	N	N	U2 test	U2 test	Train	K test	K test	K test	K test	K test	Train						Train	K test	K test	K test	K test	K test
325	/opt/ImageBase/AWS_sync/cropped/aedes/aegypti/JHU-000568_04m.jpg	Train							U2 test	N	N	U2 test	U2 test	Train	K test	K test	K test	K test	K test	Train						Train	K test	K test	K test	K test	K test
326	/opt/ImageBase/AWS_sync/cropped/aedes/aegypti/JHU-000568_06m.jpg	Train							U2 test	N	N	U2 test	U2 test	Train	K test	K test	K test	K test	K test	Train						Train	K test	K test	K test	K test	K test
327	/opt/ImageBase/AWS_sync/cropped/aedes/aegypti/JHU-000568_02m.jpg	Train							U2 test	N	N	U2 test	U2 test	Train	K test	K test	K test	K test	K test	Train						Train	K test	K test	K test	K test	K test
328	/opt/ImageBase/AWS_sync/cropped/aedes/aegypti/JHU-000568_05m.jpg	Train							U2 test	N	N	U2 test	U2 test	Train	K test	K test	K test	K test	K test	Train						Train	K test	K test	K test	K test	K test
329	/opt/ImageBase/AWS_sync/cropped/aedes/aegypti/JHU-000568_01m.jpg	Train							U2 test	N	N	U2 test	U2 test	Train	K test	K test	K test	K test	K test	Train						Train	K test	K test	K test	K test	K test
330	/opt/ImageBase/AWS_sync/cropped/aedes/aegypti/JHU-005961_02m.jpg	Train							U2 test	N	N	U2 test	U2 test	Train	train	train	train	train	train	Train						Train
331	/opt/ImageBase/AWS_sync/cropped/aedes/aegypti/JHU-005961_04m.jpg	Train							U2 test	N	N	U2 test	U2 test	Train	train	train	train	train	train	Train						Train
332	/opt/ImageBase/AWS_sync/cropped/aedes/aegypti/JHU-005961_01m.jpg	Train							U2 test	N	N	U2 test	U2 test	Train	train	train	train	train	train	Train						Train
333	/opt/ImageBase/AWS_sync/cropped/aedes/aegypti/JHU-005961_03m.jpg	Train							U2 test	N	N	U2 test	U2 test	Train	train	train	train	train	train	Train						Train
334	/opt/ImageBase/AWS_sync/cropped/aedes/aegypti/JHU-001866_03m.jpg	Train							U2 test	N	N	U2 test	U2 test	Train	K test	K test	K test	K test	K test	Train						Train
335	/opt/ImageBase/AWS_sync/cropped/aedes/aegypti/JHU-001866_02m.jpg	Train							U2 test	N	N	U2 test	U2 test	Train	K test	K test	K test	K test	K test	Train						Train
336	/opt/ImageBase/AWS_sync/cropped/aedes/aegypti/JHU-001866_01m.jpg	Train							U2 test	N	N	U2 test	U2 test	Train	K test	K test	K test	K test	K test	Train						Train
337	/opt/ImageBase/AWS_sync/cropped/aedes/aegypti/JHU-001866_04m.jpg	Train							U2 test	N	N	U2 test	U2 test	Train	K test	K test	K test	K test	K test	Train						Train
338	/opt/ImageBase/AWS_sync/cropped/aedes/aegypti/JHU-001916_05m.jpg	Train							U2 test	N	N	U2 test	U2 test	Train						Train						Train
339	/opt/ImageBase/AWS_sync/cropped/aedes/aegypti/JHU-001916_03m.jpg	Train							U2 test	N	N	U2 test	U2 test	Train						Train						Train
340	/opt/ImageBase/AWS_sync/cropped/aedes/aegypti/JHU-001916_04m.jpg	Train							U2 test	N	N	U2 test	U2 test	Train						Train						Train
341	/opt/ImageBase/AWS_sync/cropped/aedes/aegypti/JHU-001916_01m.jpg	Train							U2 test	N	N	U2 test	U2 test	Train						Train						Train
342	/opt/ImageBase/AWS_sync/cropped/aedes/aegypti/JHU-001916_02m.jpg	Train							U2 test	N	N	U2 test	U2 test	Train						Train						Train
343	/opt/ImageBase/AWS_sync/cropped/aedes/aegypti/JHU-000575_02m.jpg	Train							U2 test	N	N	U2 test	U2 test	Train						Train						Train
344	/opt/ImageBase/AWS_sync/cropped/aedes/aegypti/JHU-000575_05m.jpg	Train							U2 test	N	N	U2 test	U2 test	Train						Train						Train
345	/opt/ImageBase/AWS_sync/cropped/aedes/aegypti/JHU-000575_04m.jpg	Train							U2 test	N	N	U2 test	U2 test	Train						Train						Train
346	/opt/ImageBase/AWS_sync/cropped/aedes/aegypti/JHU-000575_03m.jpg	Train							U2 test	N	N	U2 test	U2 test	Train						Train						Train
347	/opt/ImageBase/AWS_sync/cropped/aedes/aegypti/JHU-000575_01m.jpg	Train							U2 test	N	N	U2 test	U2 test	Train						Train						Train
348	/opt/ImageBase/AWS_sync/cropped/aedes/aegypti/JHU-005967_04m.jpg	Train							U2 test	N	N	U2 test	U2 test	Train						Train	K test	K test	K test	K test	K test	Train	train	train	train	train	train
349	/opt/ImageBase/AWS_sync/cropped/aedes/aegypti/JHU-005967_02m.jpg	Train							U2 test	N	N	U2 test	U2 test	Train						Train	K test	K test	K test	K test	K test	Train	train	train	train	train	train
350	/opt/ImageBase/AWS_sync/cropped/aedes/aegypti/JHU-005967_03m.jpg	Train							U2 test	N	N	U2 test	U2 test	Train						Train	K test	K test	K test	K test	K test	Train	train	train	train	train	train
351	/opt/ImageBase/AWS_sync/cropped/aedes/aegypti/JHU-005967_01m.jpg	Train							U2 test	N	N	U2 test	U2 test	Train						Train	K test	K test	K test	K test	K test	Train	train	train	train	train	train
352	/opt/ImageBase/AWS_sync/cropped/aedes/aegypti/JHU-001913_01m.jpg	Train							U2 test	N	N	U2 test	U2 test	Train						Train	train	K test	train	K test	K test	Train	train	train	train	train	train
353	/opt/ImageBase/AWS_sync/cropped/aedes/aegypti/JHU-001913_02m.jpg	Train							U2 test	N	N	U2 test	U2 test	Train						Train	train	K test	train	K test	K test	Train	train	train	train	train	train
354	/opt/ImageBase/AWS_sync/cropped/aedes/aegypti/JHU-001913_03m.jpg	Train							U2 test	N	N	U2 test	U2 test	Train						Train	train	K test	train	K test	K test	Train	train	train	train	train	train
355	/opt/ImageBase/AWS_sync/cropped/aedes/aegypti/JHU-001913_06m.jpg	Train							U2 test	N	N	U2 test	U2 test	Train						Train	train	K test	train	K test	K test	Train	train	train	train	train	train
356	/opt/ImageBase/AWS_sync/cropped/aedes/aegypti/JHU-001913_05m.jpg	Train							U2 test	N	N	U2 test	U2 test	Train						Train	train	K test	train	K test	K test	Train	train	train	train	train	train
357	/opt/ImageBase/AWS_sync/cropped/aedes/aegypti/JHU-001913_04m.jpg	Train							U2 test	N	N	U2 test	U2 test	Train						Train	train	K test	train	K test	K test	Train	train	train	train	train	train
358	/opt/ImageBase/AWS_sync/cropped/aedes/aegypti/JHU-000566_02m.jpg	Train							U2 test	N	N	U2 test	U2 test	Train						Train						Train
359	/opt/ImageBase/AWS_sync/cropped/aedes/aegypti/JHU-000566_01m.jpg	Train							U2 test	N	N	U2 test	U2 test	Train						Train						Train
360	/opt/ImageBase/AWS_sync/cropped/aedes/aegypti/JHU-000566_03m.jpg	Train							U2 test	N	N	U2 test	U2 test	Train						Train						Train
361	/opt/ImageBase/AWS_sync/cropped/aedes/aegypti/JHU-000566_05m.jpg	Train							U2 test	N	N	U2 test	U2 test	Train						Train						Train
362	/opt/ImageBase/AWS_sync/cropped/aedes/aegypti/JHU-000566_04m.jpg	Train							U2 test	N	N	U2 test	U2 test	Train						Train						Train
363	/opt/ImageBase/AWS_sync/cropped/aedes/aegypti/JHU-005831_05m.jpg	Train							U2 test	N	N	U2 test	U2 test	Train						Train						Train
364	/opt/ImageBase/AWS_sync/cropped/aedes/aegypti/JHU-005831_04m.jpg	Train							U2 test	N	N	U2 test	U2 test	Train						Train						Train
365	/opt/ImageBase/AWS_sync/cropped/aedes/aegypti/JHU-005831_03m.jpg	Train							U2 test	N	N	U2 test	U2 test	Train						Train						Train
366	/opt/ImageBase/AWS_sync/cropped/aedes/aegypti/JHU-005831_06m.jpg	Train							U2 test	N	N	U2 test	U2 test	Train						Train						Train
367	/opt/ImageBase/AWS_sync/cropped/aedes/aegypti/JHU-005831_02m.jpg	Train							U2 test	N	N	U2 test	U2 test	Train						Train						Train
368	/opt/ImageBase/AWS_sync/cropped/aedes/aegypti/JHU-005831_07m.jpg	Train							U2 test	N	N	U2 test	U2 test	Train						Train						Train
369	/opt/ImageBase/AWS_sync/cropped/aedes/aegypti/JHU-005831_01m.jpg	Train							U2 test	N	N	U2 test	U2 test	Train						Train						Train
370	/opt/ImageBase/AWS_sync/cropped/aedes/aegypti/JHU-005899_04m.jpg	Train							U2 test	N	N	U2 test	U2 test	Train						Train						Train
371	/opt/ImageBase/AWS_sync/cropped/aedes/aegypti/JHU-005899_03m.jpg	Train							U2 test	N	N	U2 test	U2 test	Train						Train						Train
372	/opt/ImageBase/AWS_sync/cropped/aedes/aegypti/JHU-005899_05m.jpg	Train							U2 test	N	N	U2 test	U2 test	Train						Train						Train
373	/opt/ImageBase/AWS_sync/cropped/aedes/aegypti/JHU-005899_01m.jpg	Train							U2 test	N	N	U2 test	U2 test	Train						Train						Train
374	/opt/ImageBase/AWS_sync/cropped/aedes/aegypti/JHU-005899_02m.jpg	Train							U2 test	N	N	U2 test	U2 test	Train						Train						Train
375	/opt/ImageBase/AWS_sync/cropped/aedes/aegypti/JHU-001914_02m.jpg	Train							U2 test	N	N	U2 test	U2 test	Train						Train						Train
376	/opt/ImageBase/AWS_sync/cropped/aedes/aegypti/JHU-001914_04m.jpg	Train							U2 test	N	N	U2 test	U2 test	Train						Train						Train
377	/opt/ImageBase/AWS_sync/cropped/aedes/aegypti/JHU-001914_01m.jpg	Train							U2 test	N	N	U2 test	U2 test	Train						Train						Train
378	/opt/ImageBase/AWS_sync/cropped/aedes/aegypti/JHU-001914_05m.jpg	Train							U2 test	N	N	U2 test	U2 test	Train						Train						Train
379	/opt/ImageBase/AWS_sync/cropped/aedes/aegypti/JHU-001914_03m.jpg	Train							U2 test	N	N	U2 test	U2 test	Train						Train						Train
380	/opt/ImageBase/AWS_sync/cropped/aedes/aegypti/JHU-001914_06m.jpg	Train							U2 test	N	N	U2 test	U2 test	Train						Train						Train
381	/opt/ImageBase/AWS_sync/cropped/aedes/aegypti/JHU-005818_03m.jpg	Train							U2 test	N	N	U2 test	U2 test	Train						Train						Train
382	/opt/ImageBase/AWS_sync/cropped/aedes/aegypti/JHU-005818_05m.jpg	Train							U2 test	N	N	U2 test	U2 test	Train						Train						Train
383	/opt/ImageBase/AWS_sync/cropped/aedes/aegypti/JHU-005818_01m.jpg	Train							U2 test	N	N	U2 test	U2 test	Train						Train						Train
384	/opt/ImageBase/AWS_sync/cropped/aedes/aegypti/JHU-005818_04m.jpg	Train							U2 test	N	N	U2 test	U2 test	Train						Train						Train
385	/opt/ImageBase/AWS_sync/cropped/aedes/aegypti/JHU-005818_02m.jpg	Train							U2 test	N	N	U2 test	U2 test	Train						Train						Train
386	/opt/ImageBase/AWS_sync/cropped/aedes/aegypti/JHU-005952_01m.jpg	Train							U2 test	N	N	U2 test	U2 test	Train						Train						Train
387	/opt/ImageBase/AWS_sync/cropped/aedes/aegypti/JHU-005952_03m.jpg	Train							U2 test	N	N	U2 test	U2 test	Train						Train						Train
388	/opt/ImageBase/AWS_sync/cropped/aedes/aegypti/JHU-005952_02m.jpg	Train							U2 test	N	N	U2 test	U2 test	Train						Train						Train
389	/opt/ImageBase/AWS_sync/cropped/aedes/aegypti/JHU-005952_04m.jpg	Train							U2 test	N	N	U2 test	U2 test	Train						Train						Train
390	/opt/ImageBase/AWS_sync/cropped/aedes/aegypti/JHU-000659_02m.jpg	Train							U2 test	N	N	U2 test	U2 test	Train						Train						Train
391	/opt/ImageBase/AWS_sync/cropped/aedes/aegypti/JHU-000659_04m.jpg	Train							U2 test	N	N	U2 test	U2 test	Train						Train						Train
392	/opt/ImageBase/AWS_sync/cropped/aedes/aegypti/JHU-000659_03m.jpg	Train							U2 test	N	N	U2 test	U2 test	Train						Train						Train
393	/opt/ImageBase/AWS_sync/cropped/aedes/aegypti/JHU-000659_01m.jpg	Train							U2 test	N	N	U2 test	U2 test	Train						Train						Train
394	/opt/ImageBase/AWS_sync/cropped/aedes/aegypti/JHU-007497_01m.jpg	Train							U2 test	N	N	U2 test	U2 test	Train						Train						Train
395	/opt/ImageBase/AWS_sync/cropped/aedes/aegypti/JHU-007497_02m.jpg	Train							U2 test	N	N	U2 test	U2 test	Train						Train						Train
396	/opt/ImageBase/AWS_sync/cropped/aedes/aegypti/JHU-007514_02m.jpg	Train							U2 test	N	N	U2 test	U2 test	Train						Train						Train
397	/opt/ImageBase/AWS_sync/cropped/aedes/aegypti/JHU-007514_01m.jpg	Train							U2 test	N	N	U2 test	U2 test	Train						Train						Train
398	/opt/ImageBase/AWS_sync/cropped/aedes/aegypti/JHU-000613_06m.jpg	Train							U2 test	N	N	U2 test	U2 test	Train						Train						Train
399	/opt/ImageBase/AWS_sync/cropped/aedes/aegypti/JHU-000613_05m.jpg	Train							U2 test	N	N	U2 test	U2 test	Train						Train						Train
400	/opt/ImageBase/AWS_sync/cropped/aedes/aegypti/JHU-000613_01m.jpg	Train							U2 test	N	N	U2 test	U2 test	Train						Train						Train
401	/opt/ImageBase/AWS_sync/cropped/aedes/aegypti/JHU-000613_02m.jpg	Train							U2 test	N	N	U2 test	U2 test	Train						Train						Train
402	/opt/ImageBase/AWS_sync/cropped/aedes/aegypti/JHU-000613_03m.jpg	Train							U2 test	N	N	U2 test	U2 test	Train						Train						Train
403	/opt/ImageBase/AWS_sync/cropped/aedes/aegypti/JHU-000613_04m.jpg	Train							U2 test	N	N	U2 test	U2 test	Train						Train						Train
404	/opt/ImageBase/AWS_sync/cropped/aedes/aegypti/JHU-005896_03m.jpg	Train							U2 test	N	N	U2 test	U2 test	Train						Train						Train
405	/opt/ImageBase/AWS_sync/cropped/aedes/aegypti/JHU-005896_05m.jpg	Train							U2 test	N	N	U2 test	U2 test	Train						Train						Train
406	/opt/ImageBase/AWS_sync/cropped/aedes/aegypti/JHU-005896_04m.jpg	Train							U2 test	N	N	U2 test	U2 test	Train						Train						Train
407	/opt/ImageBase/AWS_sync/cropped/aedes/aegypti/JHU-005896_01m.jpg	Train							U2 test	N	N	U2 test	U2 test	Train						Train						Train
408	/opt/ImageBase/AWS_sync/cropped/aedes/aegypti/JHU-005896_02m.jpg	Train							U2 test	N	N	U2 test	U2 test	Train						Train						Train
409	/opt/ImageBase/AWS_sync/cropped/aedes/aegypti/JHU-000576_02m.jpg	Train							U2 test	N	N	U2 test	U2 test	Train						Train						Train
410	/opt/ImageBase/AWS_sync/cropped/aedes/aegypti/JHU-000576_03m.jpg	Train							U2 test	N	N	U2 test	U2 test	Train						Train						Train
411	/opt/ImageBase/AWS_sync/cropped/aedes/aegypti/JHU-000576_01m.jpg	Train							U2 test	N	N	U2 test	U2 test	Train						Train						Train
412	/opt/ImageBase/AWS_sync/cropped/aedes/aegypti/JHU-000576_04m.jpg	Train							U2 test	N	N	U2 test	U2 test	Train						Train						Train
413	/opt/ImageBase/AWS_sync/cropped/aedes/aegypti/JHU-000576_05m.jpg	Train							U2 test	N	N	U2 test	U2 test	Train						Train						Train
414	/opt/ImageBase/AWS_sync/cropped/aedes/aegypti/JHU-000605_04m.jpg	Train							U2 test	N	N	U2 test	U2 test	Train						Train						Train
415	/opt/ImageBase/AWS_sync/cropped/aedes/aegypti/JHU-000605_03m.jpg	Train							U2 test	N	N	U2 test	U2 test	Train						Train						Train
416	/opt/ImageBase/AWS_sync/cropped/aedes/aegypti/JHU-000605_05m.jpg	Train							U2 test	N	N	U2 test	U2 test	Train						Train						Train
417	/opt/ImageBase/AWS_sync/cropped/aedes/aegypti/JHU-000605_02m.jpg	Train							U2 test	N	N	U2 test	U2 test	Train						Train						Train
418	/opt/ImageBase/AWS_sync/cropped/aedes/aegypti/JHU-000605_01m.jpg	Train							U2 test	N	N	U2 test	U2 test	Train						Train						Train
419	/opt/ImageBase/AWS_sync/cropped/aedes/aegypti/JHU-001854_02m.jpg	Train							U2 test	N	N	U2 test	U2 test	Train						Train						Train
420	/opt/ImageBase/AWS_sync/cropped/aedes/aegypti/JHU-001854_05m.jpg	Train							U2 test	N	N	U2 test	U2 test	Train						Train						Train
421	/opt/ImageBase/AWS_sync/cropped/aedes/aegypti/JHU-001854_04m.jpg	Train							U2 test	N	N	U2 test	U2 test	Train						Train						Train
422	/opt/ImageBase/AWS_sync/cropped/aedes/aegypti/JHU-001854_03m.jpg	Train							U2 test	N	N	U2 test	U2 test	Train						Train						Train
423	/opt/ImageBase/AWS_sync/cropped/aedes/aegypti/JHU-001854_01m.jpg	Train							U2 test	N	N	U2 test	U2 test	Train						Train						Train
424	/opt/ImageBase/AWS_sync/cropped/aedes/aegypti/JHU-005891_02m.jpg	Train							U2 test	N	N	U2 test	U2 test	Train						Train						Train
425	/opt/ImageBase/AWS_sync/cropped/aedes/aegypti/JHU-005891_05m.jpg	Train							U2 test	N	N	U2 test	U2 test	Train						Train						Train
426	/opt/ImageBase/AWS_sync/cropped/aedes/aegypti/JHU-005891_04m.jpg	Train							U2 test	N	N	U2 test	U2 test	Train						Train						Train
427	/opt/ImageBase/AWS_sync/cropped/aedes/aegypti/JHU-005891_03m.jpg	Train							U2 test	N	N	U2 test	U2 test	Train						Train						Train
428	/opt/ImageBase/AWS_sync/cropped/aedes/aegypti/JHU-005891_01m.jpg	Train							U2 test	N	N	U2 test	U2 test	Train						Train						Train
429	/opt/ImageBase/AWS_sync/cropped/aedes/aegypti/JHU-007512_01m.jpg	Train							U2 test	N	N	U2 test	U2 test	Train						Train	K test	K test	K test	K test	K test	Train
430	/opt/ImageBase/AWS_sync/cropped/aedes/aegypti/JHU-007512_02m.jpg	Train							U2 test	N	N	U2 test	U2 test	Train						Train	K test	K test	K test	K test	K test	Train
431	/opt/ImageBase/AWS_sync/cropped/aedes/aegypti/JHU-005894_01m.jpg	Train							U2 test	N	N	U2 test	U2 test	Train						Train						Train
432	/opt/ImageBase/AWS_sync/cropped/aedes/aegypti/JHU-005894_02m.jpg	Train							U2 test	N	N	U2 test	U2 test	Train						Train						Train
433	/opt/ImageBase/AWS_sync/cropped/aedes/aegypti/JHU-005894_03m.jpg	Train							U2 test	N	N	U2 test	U2 test	Train						Train						Train
434	/opt/ImageBase/AWS_sync/cropped/aedes/aegypti/JHU-005894_04m.jpg	Train							U2 test	N	N	U2 test	U2 test	Train						Train						Train
435	/opt/ImageBase/AWS_sync/cropped/aedes/aegypti/JHU-000533_03m.jpg	Train							U2 test	N	N	U2 test	U2 test	Train						Train						Train
436	/opt/ImageBase/AWS_sync/cropped/aedes/aegypti/JHU-000533_02m.jpg	Train							U2 test	N	N	U2 test	U2 test	Train						Train						Train
437	/opt/ImageBase/AWS_sync/cropped/aedes/aegypti/JHU-000533_01m.jpg	Train							U2 test	N	N	U2 test	U2 test	Train						Train						Train
438	/opt/ImageBase/AWS_sync/cropped/aedes/aegypti/JHU-000533_05m.jpg	Train							U2 test	N	N	U2 test	U2 test	Train						Train						Train
439	/opt/ImageBase/AWS_sync/cropped/aedes/aegypti/JHU-000533_04m.jpg	Train							U2 test	N	N	U2 test	U2 test	Train						Train						Train
440	/opt/ImageBase/AWS_sync/cropped/aedes/aegypti/JHU-005916_04m.jpg	Train							U2 test	N	N	U2 test	U2 test	Train	train	train	train	train	train	Train						Train
441	/opt/ImageBase/AWS_sync/cropped/aedes/aegypti/JHU-005916_01m.jpg	Train							U2 test	N	N	U2 test	U2 test	Train	train	train	train	train	train	Train						Train
442	/opt/ImageBase/AWS_sync/cropped/aedes/aegypti/JHU-005916_02m.jpg	Train							U2 test	N	N	U2 test	U2 test	Train	train	train	train	train	train	Train						Train
443	/opt/ImageBase/AWS_sync/cropped/aedes/aegypti/JHU-005916_03m.jpg	Train							U2 test	N	N	U2 test	U2 test	Train	train	train	train	train	train	Train						Train
444	/opt/ImageBase/AWS_sync/cropped/aedes/aegypti/JHU-000620_03m.jpg	Train							U2 test	N	N	U2 test	U2 test	Train						Train						Train
445	/opt/ImageBase/AWS_sync/cropped/aedes/aegypti/JHU-000620_01m.jpg	Train							U2 test	N	N	U2 test	U2 test	Train						Train						Train
446	/opt/ImageBase/AWS_sync/cropped/aedes/aegypti/JHU-000620_05m.jpg	Train							U2 test	N	N	U2 test	U2 test	Train						Train						Train
447	/opt/ImageBase/AWS_sync/cropped/aedes/aegypti/JHU-000620_02m.jpg	Train							U2 test	N	N	U2 test	U2 test	Train						Train						Train
448	/opt/ImageBase/AWS_sync/cropped/aedes/aegypti/JHU-000620_04m.jpg	Train							U2 test	N	N	U2 test	U2 test	Train						Train						Train
449	/opt/ImageBase/AWS_sync/cropped/aedes/aegypti/JHU-000548_04m.jpg	Train							train	N	N	train	train	Train						Train						Train
450	/opt/ImageBase/AWS_sync/cropped/aedes/aegypti/JHU-000548_01m.jpg	Train							train	N	N	train	train	Train						Train						Train
451	/opt/ImageBase/AWS_sync/cropped/aedes/aegypti/JHU-000548_02m.jpg	Train							train	N	N	train	train	Train						Train						Train
452	/opt/ImageBase/AWS_sync/cropped/aedes/aegypti/JHU-000548_03m.jpg	Train							train	N	N	train	train	Train						Train						Train
453	/opt/ImageBase/AWS_sync/cropped/aedes/aegypti/JHU-000548_05m.jpg	Train							train	N	N	train	train	Train						Train						Train
454	/opt/ImageBase/AWS_sync/cropped/aedes/aegypti/JHU-000570_02m.jpg	Train							U2 test	N	N	U2 test	U2 test	Train						Train						Train
455	/opt/ImageBase/AWS_sync/cropped/aedes/aegypti/JHU-000570_01m.jpg	Train							U2 test	N	N	U2 test	U2 test	Train						Train						Train
456	/opt/ImageBase/AWS_sync/cropped/aedes/aegypti/JHU-000570_03m.jpg	Train							U2 test	N	N	U2 test	U2 test	Train						Train						Train
457	/opt/ImageBase/AWS_sync/cropped/aedes/aegypti/JHU-000570_04m.jpg	Train							U2 test	N	N	U2 test	U2 test	Train						Train						Train
458	/opt/ImageBase/AWS_sync/cropped/aedes/aegypti/JHU-000617_05m.jpg	Train							U2 test	N	N	U2 test	U2 test	Train						Train						Train
459	/opt/ImageBase/AWS_sync/cropped/aedes/aegypti/JHU-000617_01m.jpg	Train							U2 test	N	N	U2 test	U2 test	Train						Train						Train
460	/opt/ImageBase/AWS_sync/cropped/aedes/aegypti/JHU-000617_02m.jpg	Train							U2 test	N	N	U2 test	U2 test	Train						Train						Train
461	/opt/ImageBase/AWS_sync/cropped/aedes/aegypti/JHU-000617_04m.jpg	Train							U2 test	N	N	U2 test	U2 test	Train						Train						Train
462	/opt/ImageBase/AWS_sync/cropped/aedes/aegypti/JHU-000617_03m.jpg	Train							U2 test	N	N	U2 test	U2 test	Train						Train						Train
463	/opt/ImageBase/AWS_sync/cropped/aedes/aegypti/JHU-000560_04m.jpg	Train							U2 test	N	N	U2 test	U2 test	Train						Train						Train	K test	K test	K test	K test	K test
464	/opt/ImageBase/AWS_sync/cropped/aedes/aegypti/JHU-000560_01m.jpg	Train							U2 test	N	N	U2 test	U2 test	Train						Train						Train	K test	K test	K test	K test	K test
465	/opt/ImageBase/AWS_sync/cropped/aedes/aegypti/JHU-000560_02m.jpg	Train							U2 test	N	N	U2 test	U2 test	Train						Train						Train	K test	K test	K test	K test	K test
466	/opt/ImageBase/AWS_sync/cropped/aedes/aegypti/JHU-000560_03m.jpg	Train							U2 test	N	N	U2 test	U2 test	Train						Train						Train	K test	K test	K test	K test	K test
467	/opt/ImageBase/AWS_sync/cropped/aedes/aegypti/JHU-000543_02m.jpg	Train							U2 test	N	N	U2 test	U2 test	Train						Train						Train
468	/opt/ImageBase/AWS_sync/cropped/aedes/aegypti/JHU-000543_01m.jpg	Train							U2 test	N	N	U2 test	U2 test	Train						Train						Train
469	/opt/ImageBase/AWS_sync/cropped/aedes/aegypti/JHU-000543_05m.jpg	Train							U2 test	N	N	U2 test	U2 test	Train						Train						Train
470	/opt/ImageBase/AWS_sync/cropped/aedes/aegypti/JHU-000543_03m.jpg	Train							U2 test	N	N	U2 test	U2 test	Train						Train						Train
471	/opt/ImageBase/AWS_sync/cropped/aedes/aegypti/JHU-000543_04m.jpg	Train							U2 test	N	N	U2 test	U2 test	Train						Train						Train
472	/opt/ImageBase/AWS_sync/cropped/aedes/aegypti/JHU-000606_06m.jpg	Train							train	N	N	train	train	Train						Train	train	train	train	train	train	Train
473	/opt/ImageBase/AWS_sync/cropped/aedes/aegypti/JHU-000606_03m.jpg	Train							train	N	N	train	train	Train						Train	train	train	train	train	train	Train
474	/opt/ImageBase/AWS_sync/cropped/aedes/aegypti/JHU-000606_01m.jpg	Train							train	N	N	train	train	Train						Train	train	train	train	train	train	Train
475	/opt/ImageBase/AWS_sync/cropped/aedes/aegypti/JHU-000606_05m.jpg	Train							train	N	N	train	train	Train						Train	train	train	train	train	train	Train
476	/opt/ImageBase/AWS_sync/cropped/aedes/aegypti/JHU-000606_02m.jpg	Train							train	N	N	train	train	Train						Train	train	train	train	train	train	Train
477	/opt/ImageBase/AWS_sync/cropped/aedes/aegypti/JHU-000606_04m.jpg	Train							train	N	N	train	train	Train						Train	train	train	train	train	train	Train
478	/opt/ImageBase/AWS_sync/cropped/aedes/aegypti/JHU-005978_04m.jpg	Train							U2 test	N	N	U2 test	U2 test	Train						Train						Train
479	/opt/ImageBase/AWS_sync/cropped/aedes/aegypti/JHU-005978_02m.jpg	Train							U2 test	N	N	U2 test	U2 test	Train						Train						Train
480	/opt/ImageBase/AWS_sync/cropped/aedes/aegypti/JHU-005978_03m.jpg	Train							U2 test	N	N	U2 test	U2 test	Train						Train						Train
481	/opt/ImageBase/AWS_sync/cropped/aedes/aegypti/JHU-005978_05m.jpg	Train							U2 test	N	N	U2 test	U2 test	Train						Train						Train
482	/opt/ImageBase/AWS_sync/cropped/aedes/aegypti/JHU-005978_01m.jpg	Train							U2 test	N	N	U2 test	U2 test	Train						Train						Train
483	/opt/ImageBase/AWS_sync/cropped/aedes/aegypti/JHU-005898_01m.jpg	Train							train	N	N	train	train	Train						Train						Train	train	train	train	train	train
484	/opt/ImageBase/AWS_sync/cropped/aedes/aegypti/JHU-005898_03m.jpg	Train							train	N	N	train	train	Train						Train						Train	train	train	train	train	train
485	/opt/ImageBase/AWS_sync/cropped/aedes/aegypti/JHU-005898_05m.jpg	Train							train	N	N	train	train	Train						Train						Train	train	train	train	train	train
486	/opt/ImageBase/AWS_sync/cropped/aedes/aegypti/JHU-005898_02m.jpg	Train							train	N	N	train	train	Train						Train						Train	train	train	train	train	train
487	/opt/ImageBase/AWS_sync/cropped/aedes/aegypti/JHU-005898_04m.jpg	Train							train	N	N	train	train	Train						Train						Train	train	train	train	train	train
488	/opt/ImageBase/AWS_sync/cropped/aedes/aegypti/JHU-005981_03m.jpg	Train							train	N	N	train	train	Train						Train						Train
489	/opt/ImageBase/AWS_sync/cropped/aedes/aegypti/JHU-005981_04m.jpg	Train							train	N	N	train	train	Train						Train						Train
490	/opt/ImageBase/AWS_sync/cropped/aedes/aegypti/JHU-005981_01m.jpg	Train							train	N	N	train	train	Train						Train						Train
491	/opt/ImageBase/AWS_sync/cropped/aedes/aegypti/JHU-005981_02m.jpg	Train							train	N	N	train	train	Train						Train						Train
492	/opt/ImageBase/AWS_sync/cropped/aedes/aegypti/JHU-005987_01m.jpg	Train							U2 test	N	N	U2 test	U2 test	Train						Train	train	K test	train	K test	K test	Train
493	/opt/ImageBase/AWS_sync/cropped/aedes/aegypti/JHU-005987_02m.jpg	Train							U2 test	N	N	U2 test	U2 test	Train						Train	train	K test	train	K test	K test	Train
494	/opt/ImageBase/AWS_sync/cropped/aedes/aegypti/JHU-005987_03m.jpg	Train							U2 test	N	N	U2 test	U2 test	Train						Train	train	K test	train	K test	K test	Train
495	/opt/ImageBase/AWS_sync/cropped/aedes/aegypti/JHU-005987_04m.jpg	Train							U2 test	N	N	U2 test	U2 test	Train						Train	train	K test	train	K test	K test	Train
496	/opt/ImageBase/AWS_sync/cropped/aedes/aegypti/JHU-001860_02m.jpg	Train							U2 test	N	N	U2 test	U2 test	Train						Train						Train
497	/opt/ImageBase/AWS_sync/cropped/aedes/aegypti/JHU-001860_01m.jpg	Train							U2 test	N	N	U2 test	U2 test	Train						Train						Train
498	/opt/ImageBase/AWS_sync/cropped/aedes/aegypti/JHU-001860_04m.jpg	Train							U2 test	N	N	U2 test	U2 test	Train						Train						Train
499	/opt/ImageBase/AWS_sync/cropped/aedes/aegypti/JHU-001860_03m.jpg	Train							U2 test	N	N	U2 test	U2 test	Train						Train						Train
500	/opt/ImageBase/AWS_sync/cropped/aedes/aegypti/JHU-001864_04m.jpg	Train							U2 test	N	N	U2 test	U2 test	Train						Train						Train
501	/opt/ImageBase/AWS_sync/cropped/aedes/aegypti/JHU-001864_01m.jpg	Train							U2 test	N	N	U2 test	U2 test	Train						Train						Train
502	/opt/ImageBase/AWS_sync/cropped/aedes/aegypti/JHU-001864_02m.jpg	Train							U2 test	N	N	U2 test	U2 test	Train						Train						Train
503	/opt/ImageBase/AWS_sync/cropped/aedes/aegypti/JHU-001864_03m.jpg	Train							U2 test	N	N	U2 test	U2 test	Train						Train						Train
504	/opt/ImageBase/AWS_sync/cropped/aedes/aegypti/JHU-000539_03m.jpg	Train							U2 test	N	N	U2 test	U2 test	Train	train	train	train	train	train	Train						Train
505	/opt/ImageBase/AWS_sync/cropped/aedes/aegypti/JHU-000539_04m.jpg	Train							U2 test	N	N	U2 test	U2 test	Train	train	train	train	train	train	Train						Train
506	/opt/ImageBase/AWS_sync/cropped/aedes/aegypti/JHU-000539_01m.jpg	Train							U2 test	N	N	U2 test	U2 test	Train	train	train	train	train	train	Train						Train
507	/opt/ImageBase/AWS_sync/cropped/aedes/aegypti/JHU-000539_02m.jpg	Train							U2 test	N	N	U2 test	U2 test	Train	train	train	train	train	train	Train						Train
508	/opt/ImageBase/AWS_sync/cropped/aedes/aegypti/JHU-001847_02m.jpg	Train							U2 test	N	N	U2 test	U2 test	Train						Train						Train
509	/opt/ImageBase/AWS_sync/cropped/aedes/aegypti/JHU-001847_05m.jpg	Train							U2 test	N	N	U2 test	U2 test	Train						Train						Train
510	/opt/ImageBase/AWS_sync/cropped/aedes/aegypti/JHU-001847_01m.jpg	Train							U2 test	N	N	U2 test	U2 test	Train						Train						Train
511	/opt/ImageBase/AWS_sync/cropped/aedes/aegypti/JHU-001847_03m.jpg	Train							U2 test	N	N	U2 test	U2 test	Train						Train						Train
512	/opt/ImageBase/AWS_sync/cropped/aedes/aegypti/JHU-001847_04m.jpg	Train							U2 test	N	N	U2 test	U2 test	Train						Train						Train
513	/opt/ImageBase/AWS_sync/cropped/aedes/aegypti/JHU-007499_03m.jpg	Train							U2 test	N	N	U2 test	U2 test	Train						Train						Train	train	K test	train	train	train
514	/opt/ImageBase/AWS_sync/cropped/aedes/aegypti/JHU-007499_02m.jpg	Train							U2 test	N	N	U2 test	U2 test	Train						Train						Train	train	K test	train	train	train
515	/opt/ImageBase/AWS_sync/cropped/aedes/aegypti/JHU-007499_01m.jpg	Train							U2 test	N	N	U2 test	U2 test	Train						Train						Train	train	K test	train	train	train
516	/opt/ImageBase/AWS_sync/cropped/aedes/aegypti/JHU-000547_03m.jpg	Train							U2 test	N	N	U2 test	U2 test	Train						Train						Train
517	/opt/ImageBase/AWS_sync/cropped/aedes/aegypti/JHU-000547_04m.jpg	Train							U2 test	N	N	U2 test	U2 test	Train						Train						Train
518	/opt/ImageBase/AWS_sync/cropped/aedes/aegypti/JHU-000547_02m.jpg	Train							U2 test	N	N	U2 test	U2 test	Train						Train						Train
519	/opt/ImageBase/AWS_sync/cropped/aedes/aegypti/JHU-000547_01m.jpg	Train							U2 test	N	N	U2 test	U2 test	Train						Train						Train
520	/opt/ImageBase/AWS_sync/cropped/aedes/aegypti/JHU-005830_03m.jpg	Train							U2 test	N	N	U2 test	U2 test	Train	train	train	train	train	train	Train	K test	K test	K test	K test	K test	Train
521	/opt/ImageBase/AWS_sync/cropped/aedes/aegypti/JHU-005830_05m.jpg	Train							U2 test	N	N	U2 test	U2 test	Train	train	train	train	train	train	Train	K test	K test	K test	K test	K test	Train
522	/opt/ImageBase/AWS_sync/cropped/aedes/aegypti/JHU-005830_01m.jpg	Train							U2 test	N	N	U2 test	U2 test	Train	train	train	train	train	train	Train	K test	K test	K test	K test	K test	Train
523	/opt/ImageBase/AWS_sync/cropped/aedes/aegypti/JHU-005830_02m.jpg	Train							U2 test	N	N	U2 test	U2 test	Train	train	train	train	train	train	Train	K test	K test	K test	K test	K test	Train
524	/opt/ImageBase/AWS_sync/cropped/aedes/aegypti/JHU-005830_04m.jpg	Train							U2 test	N	N	U2 test	U2 test	Train	train	train	train	train	train	Train	K test	K test	K test	K test	K test	Train
525	/opt/ImageBase/AWS_sync/cropped/aedes/aegypti/JHU-000584_01m.jpg	Train							U2 test	N	N	U2 test	U2 test	Train						Train						Train	train	train	train	train	train
526	/opt/ImageBase/AWS_sync/cropped/aedes/aegypti/JHU-000584_05m.jpg	Train							U2 test	N	N	U2 test	U2 test	Train						Train						Train	train	train	train	train	train
527	/opt/ImageBase/AWS_sync/cropped/aedes/aegypti/JHU-000584_04m.jpg	Train							U2 test	N	N	U2 test	U2 test	Train						Train						Train	train	train	train	train	train
528	/opt/ImageBase/AWS_sync/cropped/aedes/aegypti/JHU-000584_03m.jpg	Train							U2 test	N	N	U2 test	U2 test	Train						Train						Train	train	train	train	train	train
529	/opt/ImageBase/AWS_sync/cropped/aedes/aegypti/JHU-000584_02m.jpg	Train							U2 test	N	N	U2 test	U2 test	Train						Train						Train	train	train	train	train	train
530	/opt/ImageBase/AWS_sync/cropped/aedes/aegypti/JHU-005853_01m.jpg	Train							U2 test	N	N	U2 test	U2 test	Train						Train						Train
531	/opt/ImageBase/AWS_sync/cropped/aedes/aegypti/JHU-005853_05m.jpg	Train							U2 test	N	N	U2 test	U2 test	Train						Train						Train
532	/opt/ImageBase/AWS_sync/cropped/aedes/aegypti/JHU-005853_02m.jpg	Train							U2 test	N	N	U2 test	U2 test	Train						Train						Train
533	/opt/ImageBase/AWS_sync/cropped/aedes/aegypti/JHU-005853_04m.jpg	Train							U2 test	N	N	U2 test	U2 test	Train						Train						Train
534	/opt/ImageBase/AWS_sync/cropped/aedes/aegypti/JHU-005853_03m.jpg	Train							U2 test	N	N	U2 test	U2 test	Train						Train						Train
535	/opt/ImageBase/AWS_sync/cropped/aedes/aegypti/JHU-000558_04m.jpg	Train							U2 test	N	N	U2 test	U2 test	Train						Train						Train
536	/opt/ImageBase/AWS_sync/cropped/aedes/aegypti/JHU-000558_03m.jpg	Train							U2 test	N	N	U2 test	U2 test	Train						Train						Train
537	/opt/ImageBase/AWS_sync/cropped/aedes/aegypti/JHU-000558_05m.jpg	Train							U2 test	N	N	U2 test	U2 test	Train						Train						Train
538	/opt/ImageBase/AWS_sync/cropped/aedes/aegypti/JHU-000558_02m.jpg	Train							U2 test	N	N	U2 test	U2 test	Train						Train						Train
539	/opt/ImageBase/AWS_sync/cropped/aedes/aegypti/JHU-000558_01m.jpg	Train							U2 test	N	N	U2 test	U2 test	Train						Train						Train
540	/opt/ImageBase/AWS_sync/cropped/aedes/aegypti/JHU-001862_02m.jpg	Train							U2 test	N	N	U2 test	U2 test	Train						Train						Train
541	/opt/ImageBase/AWS_sync/cropped/aedes/aegypti/JHU-001862_04m.jpg	Train							U2 test	N	N	U2 test	U2 test	Train						Train						Train
542	/opt/ImageBase/AWS_sync/cropped/aedes/aegypti/JHU-001862_03m.jpg	Train							U2 test	N	N	U2 test	U2 test	Train						Train						Train
543	/opt/ImageBase/AWS_sync/cropped/aedes/aegypti/JHU-001862_05m.jpg	Train							U2 test	N	N	U2 test	U2 test	Train						Train						Train
544	/opt/ImageBase/AWS_sync/cropped/aedes/aegypti/JHU-001862_01m.jpg	Train							U2 test	N	N	U2 test	U2 test	Train						Train						Train
545	/opt/ImageBase/AWS_sync/cropped/aedes/aegypti/JHU-000608_03m.jpg	Train							U2 test	N	N	U2 test	U2 test	Train						Train						Train
546	/opt/ImageBase/AWS_sync/cropped/aedes/aegypti/JHU-000608_05m.jpg	Train							U2 test	N	N	U2 test	U2 test	Train						Train						Train
547	/opt/ImageBase/AWS_sync/cropped/aedes/aegypti/JHU-000608_02m.jpg	Train							U2 test	N	N	U2 test	U2 test	Train						Train						Train
548	/opt/ImageBase/AWS_sync/cropped/aedes/aegypti/JHU-000608_04m.jpg	Train							U2 test	N	N	U2 test	U2 test	Train						Train						Train
549	/opt/ImageBase/AWS_sync/cropped/aedes/aegypti/JHU-000608_01m.jpg	Train							U2 test	N	N	U2 test	U2 test	Train						Train						Train
550	/opt/ImageBase/AWS_sync/cropped/aedes/aegypti/JHU-000610_01m.jpg	Train							U2 test	N	N	U2 test	U2 test	Train						Train						Train
551	/opt/ImageBase/AWS_sync/cropped/aedes/aegypti/JHU-000610_02m.jpg	Train							U2 test	N	N	U2 test	U2 test	Train						Train						Train
552	/opt/ImageBase/AWS_sync/cropped/aedes/aegypti/JHU-000610_03m.jpg	Train							U2 test	N	N	U2 test	U2 test	Train						Train						Train
553	/opt/ImageBase/AWS_sync/cropped/aedes/aegypti/JHU-000610_04m.jpg	Train							U2 test	N	N	U2 test	U2 test	Train						Train						Train
554	/opt/ImageBase/AWS_sync/cropped/aedes/aegypti/JHU-000600_03m.jpg	Train							U2 test	N	N	U2 test	U2 test	Train						Train						Train
555	/opt/ImageBase/AWS_sync/cropped/aedes/aegypti/JHU-000600_05m.jpg	Train							U2 test	N	N	U2 test	U2 test	Train						Train						Train
556	/opt/ImageBase/AWS_sync/cropped/aedes/aegypti/JHU-000600_01m.jpg	Train							U2 test	N	N	U2 test	U2 test	Train						Train						Train
557	/opt/ImageBase/AWS_sync/cropped/aedes/aegypti/JHU-000600_04m.jpg	Train							U2 test	N	N	U2 test	U2 test	Train						Train						Train
558	/opt/ImageBase/AWS_sync/cropped/aedes/aegypti/JHU-000600_02m.jpg	Train							U2 test	N	N	U2 test	U2 test	Train						Train						Train
559	/opt/ImageBase/AWS_sync/cropped/aedes/aegypti/JHU-000567_02m.jpg	Train							U2 test	N	N	U2 test	U2 test	Train						Train						Train
560	/opt/ImageBase/AWS_sync/cropped/aedes/aegypti/JHU-000567_05m.jpg	Train							U2 test	N	N	U2 test	U2 test	Train						Train						Train
561	/opt/ImageBase/AWS_sync/cropped/aedes/aegypti/JHU-000567_04m.jpg	Train							U2 test	N	N	U2 test	U2 test	Train						Train						Train
562	/opt/ImageBase/AWS_sync/cropped/aedes/aegypti/JHU-000567_01m.jpg	Train							U2 test	N	N	U2 test	U2 test	Train						Train						Train
563	/opt/ImageBase/AWS_sync/cropped/aedes/aegypti/JHU-000567_03m.jpg	Train							U2 test	N	N	U2 test	U2 test	Train						Train						Train
564	/opt/ImageBase/AWS_sync/cropped/aedes/aegypti/JHU-005991_04m.jpg	Train							U2 test	N	N	U2 test	U2 test	Train						Train						Train
565	/opt/ImageBase/AWS_sync/cropped/aedes/aegypti/JHU-005991_05m.jpg	Train							U2 test	N	N	U2 test	U2 test	Train						Train						Train
566	/opt/ImageBase/AWS_sync/cropped/aedes/aegypti/JHU-005991_01m.jpg	Train							U2 test	N	N	U2 test	U2 test	Train						Train						Train
567	/opt/ImageBase/AWS_sync/cropped/aedes/aegypti/JHU-005991_03m.jpg	Train							U2 test	N	N	U2 test	U2 test	Train						Train						Train
568	/opt/ImageBase/AWS_sync/cropped/aedes/aegypti/JHU-005991_02m.jpg	Train							U2 test	N	N	U2 test	U2 test	Train						Train						Train
569	/opt/ImageBase/AWS_sync/cropped/aedes/aegypti/JHU-000592_03m.jpg	Train							U2 test	N	N	U2 test	U2 test	Train						Train						Train
570	/opt/ImageBase/AWS_sync/cropped/aedes/aegypti/JHU-000592_04m.jpg	Train							U2 test	N	N	U2 test	U2 test	Train						Train						Train
571	/opt/ImageBase/AWS_sync/cropped/aedes/aegypti/JHU-000592_01m.jpg	Train							U2 test	N	N	U2 test	U2 test	Train						Train						Train
572	/opt/ImageBase/AWS_sync/cropped/aedes/aegypti/JHU-000592_02m.jpg	Train							U2 test	N	N	U2 test	U2 test	Train						Train						Train
573	/opt/ImageBase/AWS_sync/cropped/aedes/aegypti/JHU-005977_04m.jpg	Train							U2 test	N	N	U2 test	U2 test	Train						Train						Train
574	/opt/ImageBase/AWS_sync/cropped/aedes/aegypti/JHU-005977_02m.jpg	Train							U2 test	N	N	U2 test	U2 test	Train						Train						Train
575	/opt/ImageBase/AWS_sync/cropped/aedes/aegypti/JHU-005977_03m.jpg	Train							U2 test	N	N	U2 test	U2 test	Train						Train						Train
576	/opt/ImageBase/AWS_sync/cropped/aedes/aegypti/JHU-005977_01m.jpg	Train							U2 test	N	N	U2 test	U2 test	Train						Train						Train
577	/opt/ImageBase/AWS_sync/cropped/aedes/aegypti/JHU-000571_02m.jpg	Train							U2 test	N	N	U2 test	U2 test	Train						Train						Train
578	/opt/ImageBase/AWS_sync/cropped/aedes/aegypti/JHU-000571_01m.jpg	Train							U2 test	N	N	U2 test	U2 test	Train						Train						Train
579	/opt/ImageBase/AWS_sync/cropped/aedes/aegypti/JHU-000571_03m.jpg	Train							U2 test	N	N	U2 test	U2 test	Train						Train						Train
580	/opt/ImageBase/AWS_sync/cropped/aedes/aegypti/JHU-000571_05m.jpg	Train							U2 test	N	N	U2 test	U2 test	Train						Train						Train
581	/opt/ImageBase/AWS_sync/cropped/aedes/aegypti/JHU-000571_04m.jpg	Train							U2 test	N	N	U2 test	U2 test	Train						Train						Train
582	/opt/ImageBase/AWS_sync/cropped/aedes/aegypti/JHU-001845_01m.jpg	Train							U2 test	N	N	U2 test	U2 test	Train	train	train	train	train	train	Train	train	train	train	train	train	Train	K test	K test	K test	K test	K test
583	/opt/ImageBase/AWS_sync/cropped/aedes/aegypti/JHU-001845_02m.jpg	Train							U2 test	N	N	U2 test	U2 test	Train	train	train	train	train	train	Train	train	train	train	train	train	Train	K test	K test	K test	K test	K test
584	/opt/ImageBase/AWS_sync/cropped/aedes/aegypti/JHU-001845_03m.jpg	Train							U2 test	N	N	U2 test	U2 test	Train	train	train	train	train	train	Train	train	train	train	train	train	Train	K test	K test	K test	K test	K test
585	/opt/ImageBase/AWS_sync/cropped/aedes/aegypti/JHU-001845_05m.jpg	Train							U2 test	N	N	U2 test	U2 test	Train	train	train	train	train	train	Train	train	train	train	train	train	Train	K test	K test	K test	K test	K test
586	/opt/ImageBase/AWS_sync/cropped/aedes/aegypti/JHU-001845_04m.jpg	Train							U2 test	N	N	U2 test	U2 test	Train	train	train	train	train	train	Train	train	train	train	train	train	Train	K test	K test	K test	K test	K test
587	/opt/ImageBase/AWS_sync/cropped/aedes/aegypti/JHU-000615_01m.jpg	Train							U2 test	N	N	U2 test	U2 test	Train						Train						Train
588	/opt/ImageBase/AWS_sync/cropped/aedes/aegypti/JHU-000615_04m.jpg	Train							U2 test	N	N	U2 test	U2 test	Train						Train						Train
589	/opt/ImageBase/AWS_sync/cropped/aedes/aegypti/JHU-000615_03m.jpg	Train							U2 test	N	N	U2 test	U2 test	Train						Train						Train
590	/opt/ImageBase/AWS_sync/cropped/aedes/aegypti/JHU-000615_02m.jpg	Train							U2 test	N	N	U2 test	U2 test	Train						Train						Train
591	/opt/ImageBase/AWS_sync/cropped/aedes/aegypti/JHU-005882_02m.jpg	Train							U2 test	N	N	U2 test	U2 test	Train						Train						Train
592	/opt/ImageBase/AWS_sync/cropped/aedes/aegypti/JHU-005882_03m.jpg	Train							U2 test	N	N	U2 test	U2 test	Train						Train						Train
593	/opt/ImageBase/AWS_sync/cropped/aedes/aegypti/JHU-005882_01m.jpg	Train							U2 test	N	N	U2 test	U2 test	Train						Train						Train
594	/opt/ImageBase/AWS_sync/cropped/aedes/aegypti/JHU-005882_05m.jpg	Train							U2 test	N	N	U2 test	U2 test	Train						Train						Train
595	/opt/ImageBase/AWS_sync/cropped/aedes/aegypti/JHU-005882_04m.jpg	Train							U2 test	N	N	U2 test	U2 test	Train						Train						Train
596	/opt/ImageBase/AWS_sync/cropped/aedes/aegypti/JHU-000583_04m.jpg	Train							U2 test	N	N	U2 test	U2 test	Train						Train						Train
597	/opt/ImageBase/AWS_sync/cropped/aedes/aegypti/JHU-000583_01m.jpg	Train							U2 test	N	N	U2 test	U2 test	Train						Train						Train
598	/opt/ImageBase/AWS_sync/cropped/aedes/aegypti/JHU-000583_05m.jpg	Train							U2 test	N	N	U2 test	U2 test	Train						Train						Train
599	/opt/ImageBase/AWS_sync/cropped/aedes/aegypti/JHU-000583_03m.jpg	Train							U2 test	N	N	U2 test	U2 test	Train						Train						Train
600	/opt/ImageBase/AWS_sync/cropped/aedes/aegypti/JHU-000583_02m.jpg	Train							U2 test	N	N	U2 test	U2 test	Train						Train						Train
601	/opt/ImageBase/AWS_sync/cropped/aedes/aegypti/JHU-001848_03m.jpg	Train							U2 test	N	N	U2 test	U2 test	Train						Train	K test	K test	K test	K test	K test	Train
602	/opt/ImageBase/AWS_sync/cropped/aedes/aegypti/JHU-001848_02m.jpg	Train							U2 test	N	N	U2 test	U2 test	Train						Train	K test	K test	K test	K test	K test	Train
603	/opt/ImageBase/AWS_sync/cropped/aedes/aegypti/JHU-001848_01m.jpg	Train							U2 test	N	N	U2 test	U2 test	Train						Train	K test	K test	K test	K test	K test	Train
604	/opt/ImageBase/AWS_sync/cropped/aedes/aegypti/JHU-001848_04m.jpg	Train							U2 test	N	N	U2 test	U2 test	Train						Train	K test	K test	K test	K test	K test	Train
605	/opt/ImageBase/AWS_sync/cropped/aedes/aegypti/JHU-001848_05m.jpg	Train							U2 test	N	N	U2 test	U2 test	Train						Train	K test	K test	K test	K test	K test	Train
606	/opt/ImageBase/AWS_sync/cropped/aedes/aegypti/JHU-005990_04m.jpg	Train							U2 test	N	N	U2 test	U2 test	Train						Train						Train
607	/opt/ImageBase/AWS_sync/cropped/aedes/aegypti/JHU-005990_01m.jpg	Train							U2 test	N	N	U2 test	U2 test	Train						Train						Train
608	/opt/ImageBase/AWS_sync/cropped/aedes/aegypti/JHU-005990_03m.jpg	Train							U2 test	N	N	U2 test	U2 test	Train						Train						Train
609	/opt/ImageBase/AWS_sync/cropped/aedes/aegypti/JHU-005990_02m.jpg	Train							U2 test	N	N	U2 test	U2 test	Train						Train						Train
610	/opt/ImageBase/AWS_sync/cropped/aedes/aegypti/JHU-005832_02m.jpg	Train							U2 test	N	N	U2 test	U2 test	Train						Train	train	train	train	train	train	Train
611	/opt/ImageBase/AWS_sync/cropped/aedes/aegypti/JHU-005832_05m.jpg	Train							U2 test	N	N	U2 test	U2 test	Train						Train	train	train	train	train	train	Train
612	/opt/ImageBase/AWS_sync/cropped/aedes/aegypti/JHU-005832_03m.jpg	Train							U2 test	N	N	U2 test	U2 test	Train						Train	train	train	train	train	train	Train
613	/opt/ImageBase/AWS_sync/cropped/aedes/aegypti/JHU-005832_01m.jpg	Train							U2 test	N	N	U2 test	U2 test	Train						Train	train	train	train	train	train	Train
614	/opt/ImageBase/AWS_sync/cropped/aedes/aegypti/JHU-005832_04m.jpg	Train							U2 test	N	N	U2 test	U2 test	Train						Train	train	train	train	train	train	Train
615	/opt/ImageBase/AWS_sync/cropped/aedes/aegypti/JHU-000603_05m.jpg	Train							U2 test	N	N	U2 test	U2 test	Train						Train						Train
616	/opt/ImageBase/AWS_sync/cropped/aedes/aegypti/JHU-000603_03m.jpg	Train							U2 test	N	N	U2 test	U2 test	Train						Train						Train
617	/opt/ImageBase/AWS_sync/cropped/aedes/aegypti/JHU-000603_01m.jpg	Train							U2 test	N	N	U2 test	U2 test	Train						Train						Train
618	/opt/ImageBase/AWS_sync/cropped/aedes/aegypti/JHU-000603_04m.jpg	Train							U2 test	N	N	U2 test	U2 test	Train						Train						Train
619	/opt/ImageBase/AWS_sync/cropped/aedes/aegypti/JHU-000603_02m.jpg	Train							U2 test	N	N	U2 test	U2 test	Train						Train						Train
620	/opt/ImageBase/AWS_sync/cropped/aedes/aegypti/JHU-005956_03m.jpg	Train							U2 test	N	N	U2 test	U2 test	Train						Train	train	train	train	train	train	Train
621	/opt/ImageBase/AWS_sync/cropped/aedes/aegypti/JHU-005956_02m.jpg	Train							U2 test	N	N	U2 test	U2 test	Train						Train	train	train	train	train	train	Train
622	/opt/ImageBase/AWS_sync/cropped/aedes/aegypti/JHU-005956_01m.jpg	Train							U2 test	N	N	U2 test	U2 test	Train						Train	train	train	train	train	train	Train
623	/opt/ImageBase/AWS_sync/cropped/aedes/aegypti/JHU-005956_04m.jpg	Train							U2 test	N	N	U2 test	U2 test	Train						Train	train	train	train	train	train	Train
624	/opt/ImageBase/AWS_sync/cropped/aedes/aegypti/JHU-000582_03m.jpg	Train							U2 test	N	N	U2 test	U2 test	Train						Train						Train	train	train	train	train	train
625	/opt/ImageBase/AWS_sync/cropped/aedes/aegypti/JHU-000582_04m.jpg	Train							U2 test	N	N	U2 test	U2 test	Train						Train						Train	train	train	train	train	train
626	/opt/ImageBase/AWS_sync/cropped/aedes/aegypti/JHU-000582_02m.jpg	Train							U2 test	N	N	U2 test	U2 test	Train						Train						Train	train	train	train	train	train
627	/opt/ImageBase/AWS_sync/cropped/aedes/aegypti/JHU-000582_01m.jpg	Train							U2 test	N	N	U2 test	U2 test	Train						Train						Train	train	train	train	train	train
628	/opt/ImageBase/AWS_sync/cropped/aedes/aegypti/JHU-000557_01m.jpg	Train							U2 test	N	N	U2 test	U2 test	Train						Train	K test	K test	K test	K test	K test	Train
629	/opt/ImageBase/AWS_sync/cropped/aedes/aegypti/JHU-000557_03m.jpg	Train							U2 test	N	N	U2 test	U2 test	Train						Train	K test	K test	K test	K test	K test	Train
630	/opt/ImageBase/AWS_sync/cropped/aedes/aegypti/JHU-000557_05m.jpg	Train							U2 test	N	N	U2 test	U2 test	Train						Train	K test	K test	K test	K test	K test	Train
631	/opt/ImageBase/AWS_sync/cropped/aedes/aegypti/JHU-000557_02m.jpg	Train							U2 test	N	N	U2 test	U2 test	Train						Train	K test	K test	K test	K test	K test	Train
632	/opt/ImageBase/AWS_sync/cropped/aedes/aegypti/JHU-000557_04m.jpg	Train							U2 test	N	N	U2 test	U2 test	Train						Train	K test	K test	K test	K test	K test	Train
633	/opt/ImageBase/AWS_sync/cropped/aedes/aegypti/JHU-000563_05m.jpg	Train							U2 test	N	N	U2 test	U2 test	Train						Train						Train	K test	K test	K test	K test	K test
634	/opt/ImageBase/AWS_sync/cropped/aedes/aegypti/JHU-000563_01m.jpg	Train							U2 test	N	N	U2 test	U2 test	Train						Train						Train	K test	K test	K test	K test	K test
635	/opt/ImageBase/AWS_sync/cropped/aedes/aegypti/JHU-000563_02m.jpg	Train							U2 test	N	N	U2 test	U2 test	Train						Train						Train	K test	K test	K test	K test	K test
636	/opt/ImageBase/AWS_sync/cropped/aedes/aegypti/JHU-000563_03m.jpg	Train							U2 test	N	N	U2 test	U2 test	Train						Train						Train	K test	K test	K test	K test	K test
637	/opt/ImageBase/AWS_sync/cropped/aedes/aegypti/JHU-000563_04m.jpg	Train							U2 test	N	N	U2 test	U2 test	Train						Train						Train	K test	K test	K test	K test	K test
638	/opt/ImageBase/AWS_sync/cropped/aedes/aegypti/JHU-000562_01m.jpg	Train							U2 test	N	N	U2 test	U2 test	Train						Train						Train
639	/opt/ImageBase/AWS_sync/cropped/aedes/aegypti/JHU-000562_03m.jpg	Train							U2 test	N	N	U2 test	U2 test	Train						Train						Train
640	/opt/ImageBase/AWS_sync/cropped/aedes/aegypti/JHU-000562_04m.jpg	Train							U2 test	N	N	U2 test	U2 test	Train						Train						Train
641	/opt/ImageBase/AWS_sync/cropped/aedes/aegypti/JHU-000562_02m.jpg	Train							U2 test	N	N	U2 test	U2 test	Train						Train						Train
642	/opt/ImageBase/AWS_sync/cropped/aedes/aegypti/JHU-000607_04m.jpg	Valid							U2 test	N	N	U2 test	U2 test	Train						Train						Train	train	K test	train	train	train
643	/opt/ImageBase/AWS_sync/cropped/aedes/aegypti/JHU-000607_05m.jpg	Valid							U2 test	N	N	U2 test	U2 test	Train						Train						Train	train	K test	train	train	train
644	/opt/ImageBase/AWS_sync/cropped/aedes/aegypti/JHU-000607_03m.jpg	Valid							U2 test	N	N	U2 test	U2 test	Train						Train						Train	train	K test	train	train	train
645	/opt/ImageBase/AWS_sync/cropped/aedes/aegypti/JHU-000607_02m.jpg	Valid							U2 test	N	N	U2 test	U2 test	Train						Train						Train	train	K test	train	train	train
646	/opt/ImageBase/AWS_sync/cropped/aedes/aegypti/JHU-000607_01m.jpg	Valid							U2 test	N	N	U2 test	U2 test	Train						Train						Train	train	K test	train	train	train
647	/opt/ImageBase/AWS_sync/cropped/aedes/aegypti/JHU-005895_05m.jpg	Valid							train	N	N	train	train	Train						Train						Train
648	/opt/ImageBase/AWS_sync/cropped/aedes/aegypti/JHU-005895_01m.jpg	Valid							train	N	N	train	train	Train						Train						Train
649	/opt/ImageBase/AWS_sync/cropped/aedes/aegypti/JHU-005895_04m.jpg	Valid							train	N	N	train	train	Train						Train						Train
650	/opt/ImageBase/AWS_sync/cropped/aedes/aegypti/JHU-005895_02m.jpg	Valid							train	N	N	train	train	Train						Train						Train
651	/opt/ImageBase/AWS_sync/cropped/aedes/aegypti/JHU-005895_06m.jpg	Valid							train	N	N	train	train	Train						Train						Train
652	/opt/ImageBase/AWS_sync/cropped/aedes/aegypti/JHU-005895_03m.jpg	Valid							train	N	N	train	train	Train						Train						Train
653	/opt/ImageBase/AWS_sync/cropped/aedes/aegypti/JHU-000621_04m.jpg	Valid							U2 test	N	N	U2 test	U2 test	Train	train	train	train	train	train	Train						Train
654	/opt/ImageBase/AWS_sync/cropped/aedes/aegypti/JHU-000621_01m.jpg	Valid							U2 test	N	N	U2 test	U2 test	Train	train	train	train	train	train	Train						Train
655	/opt/ImageBase/AWS_sync/cropped/aedes/aegypti/JHU-000621_02m.jpg	Valid							U2 test	N	N	U2 test	U2 test	Train	train	train	train	train	train	Valid						Train
656	/opt/ImageBase/AWS_sync/cropped/aedes/aegypti/JHU-000621_03m.jpg	Valid							U2 test	N	N	U2 test	U2 test	Train	train	train	train	train	train	Valid						Train
657	/opt/ImageBase/AWS_sync/cropped/aedes/aegypti/JHU-000621_05m.jpg	Valid							U2 test	N	N	U2 test	U2 test	Train	train	train	train	train	train	Valid						Train
658	/opt/ImageBase/AWS_sync/cropped/aedes/aegypti/JHU-000601_01m.jpg	Valid							train	N	N	train	train	Train						Valid						Train
659	/opt/ImageBase/AWS_sync/cropped/aedes/aegypti/JHU-000601_02m.jpg	Valid							train	N	N	train	train	Train						Valid						Train
660	/opt/ImageBase/AWS_sync/cropped/aedes/aegypti/JHU-000601_04m.jpg	Valid							train	N	N	train	train	Valid						Valid						Valid
661	/opt/ImageBase/AWS_sync/cropped/aedes/aegypti/JHU-000601_03m.jpg	Valid							train	N	N	train	train	Valid						Valid						Valid
662	/opt/ImageBase/AWS_sync/cropped/aedes/aegypti/JHU-000577_02m.jpg	Valid							U2 test	N	N	train	train	Valid						Valid						Valid	train	train	train	train	train
663	/opt/ImageBase/AWS_sync/cropped/aedes/aegypti/JHU-000577_01m.jpg	Valid							U2 test	N	N	train	train	Valid						Valid						Valid	train	train	train	train	train
664	/opt/ImageBase/AWS_sync/cropped/aedes/aegypti/JHU-000577_04m.jpg	Valid							U2 test	N	N	train	train	Valid						Valid						Valid	train	train	train	train	train
665	/opt/ImageBase/AWS_sync/cropped/aedes/aegypti/JHU-000577_03m.jpg	Valid							U2 test	N	N	train	train	Valid						Valid						Valid	train	train	train	train	train
666	/opt/ImageBase/AWS_sync/cropped/aedes/aegypti/JHU-005975_02m.jpg	Valid							U2 test	N	N	U2 test	U2 test	Valid						Valid						Valid
667	/opt/ImageBase/AWS_sync/cropped/aedes/aegypti/JHU-005975_01m.jpg	Valid							U2 test	N	N	U2 test	U2 test	Valid						Valid						Valid
668	/opt/ImageBase/AWS_sync/cropped/aedes/aegypti/JHU-005975_04m.jpg	Valid							U2 test	N	N	U2 test	U2 test	Valid						Valid						Valid
669	/opt/ImageBase/AWS_sync/cropped/aedes/aegypti/JHU-005975_06m.jpg	Valid							U2 test	N	N	U2 test	U2 test	Valid						Valid						Valid
670	/opt/ImageBase/AWS_sync/cropped/aedes/aegypti/JHU-005975_09m.jpg	Valid							U2 test	N	N	U2 test	U2 test	Valid						Valid						Valid
671	/opt/ImageBase/AWS_sync/cropped/aedes/aegypti/JHU-005975_10m.jpg	Valid							U2 test	N	N	U2 test	U2 test	Valid						Valid						Valid
672	/opt/ImageBase/AWS_sync/cropped/aedes/aegypti/JHU-005975_03m.jpg	Valid							U2 test	N	N	U2 test	U2 test	Valid						Valid						Valid
673	/opt/ImageBase/AWS_sync/cropped/aedes/aegypti/JHU-005975_08m.jpg	Valid							U2 test	N	N	U2 test	U2 test	Valid						Valid						Valid
674	/opt/ImageBase/AWS_sync/cropped/aedes/aegypti/JHU-005975_07m.jpg	Valid							U2 test	N	N	U2 test	U2 test	Valid						Valid						Valid
675	/opt/ImageBase/AWS_sync/cropped/aedes/aegypti/JHU-005975_05m.jpg	Valid							U2 test	N	N	U2 test	U2 test	Valid						Valid						Valid
676	/opt/ImageBase/AWS_sync/cropped/aedes/aegypti/JHU-000616_05m.jpg	Valid							U2 test	N	N	U2 test	U2 test	Valid						Valid						Valid
677	/opt/ImageBase/AWS_sync/cropped/aedes/aegypti/JHU-000616_01m.jpg	Valid							U2 test	N	N	U2 test	U2 test	Valid						Valid						Valid
678	/opt/ImageBase/AWS_sync/cropped/aedes/aegypti/JHU-000616_04m.jpg	Valid							U2 test	N	N	U2 test	U2 test	Valid						Valid						Valid
679	/opt/ImageBase/AWS_sync/cropped/aedes/aegypti/JHU-000616_03m.jpg	Valid							U2 test	N	N	U2 test	U2 test	Valid						Valid						Valid
680	/opt/ImageBase/AWS_sync/cropped/aedes/aegypti/JHU-000616_02m.jpg	Valid							U2 test	N	N	U2 test	U2 test	Valid						Valid						Valid
681	/opt/ImageBase/AWS_sync/cropped/aedes/aegypti/JHU-005980_05m.jpg	Valid							U2 test	N	N	U2 test	U2 test	Valid	train	train	train	train	train	Valid						Valid
682	/opt/ImageBase/AWS_sync/cropped/aedes/aegypti/JHU-005980_03m.jpg	Valid							U2 test	N	N	U2 test	U2 test	Valid	train	train	train	train	train	Valid						Valid
683	/opt/ImageBase/AWS_sync/cropped/aedes/aegypti/JHU-005980_02m.jpg	Valid							U2 test	N	N	U2 test	U2 test	Valid	train	train	train	train	train	Valid						Valid
684	/opt/ImageBase/AWS_sync/cropped/aedes/aegypti/JHU-005980_04m.jpg	Valid							U2 test	N	N	U2 test	U2 test	Valid	train	train	train	train	train	Valid						Valid
685	/opt/ImageBase/AWS_sync/cropped/aedes/aegypti/JHU-005980_01m.jpg	Valid							U2 test	N	N	U2 test	U2 test	Valid	train	train	train	train	train	Valid						Valid
686	/opt/ImageBase/AWS_sync/cropped/aedes/aegypti/JHU-007517_01m.jpg	Valid							U2 test	N	N	U2 test	U2 test	Valid						Valid	train	K test	train	K test	K test	Valid
687	/opt/ImageBase/AWS_sync/cropped/aedes/aegypti/JHU-007517_02m.jpg	Valid							U2 test	N	N	U2 test	U2 test	Valid						Valid	train	K test	train	K test	K test	Valid
688	/opt/ImageBase/AWS_sync/cropped/aedes/aegypti/JHU-005985_05m.jpg	Valid							U2 test	N	N	U2 test	U2 test	Valid						Valid						Valid
689	/opt/ImageBase/AWS_sync/cropped/aedes/aegypti/JHU-005985_04m.jpg	Valid							U2 test	N	N	U2 test	U2 test	Valid						Valid						Valid
690	/opt/ImageBase/AWS_sync/cropped/aedes/aegypti/JHU-005985_03m.jpg	Valid							U2 test	N	N	U2 test	U2 test	Valid						Valid						Valid
691	/opt/ImageBase/AWS_sync/cropped/aedes/aegypti/JHU-005985_01m.jpg	Valid							U2 test	N	N	U2 test	U2 test	Valid						Valid						Valid
692	/opt/ImageBase/AWS_sync/cropped/aedes/aegypti/JHU-005985_02m.jpg	Valid							U2 test	N	N	U2 test	U2 test	Valid						Valid						Valid
693	/opt/ImageBase/AWS_sync/cropped/aedes/aegypti/JHU-005817_05m.jpg	Valid							U2 test	N	N	U2 test	U2 test	Valid						Valid						Valid
694	/opt/ImageBase/AWS_sync/cropped/aedes/aegypti/JHU-005817_02m.jpg	Valid							U2 test	N	N	U2 test	U2 test	Valid						Valid						Valid
695	/opt/ImageBase/AWS_sync/cropped/aedes/aegypti/JHU-005817_03m.jpg	Valid							U2 test	N	N	U2 test	U2 test	Valid						Valid						Valid
696	/opt/ImageBase/AWS_sync/cropped/aedes/aegypti/JHU-005817_04m.jpg	Valid							U2 test	N	N	U2 test	U2 test	Valid						Valid						Valid
697	/opt/ImageBase/AWS_sync/cropped/aedes/aegypti/JHU-005817_01m.jpg	Valid							U2 test	N	N	U2 test	U2 test	Valid						Valid						Valid
698	/opt/ImageBase/AWS_sync/cropped/aedes/aegypti/JHU-000537_04m.jpg	Valid							U2 test	N	N	U2 test	U2 test	Valid						Valid	train	train	train	K test	train	Valid
699	/opt/ImageBase/AWS_sync/cropped/aedes/aegypti/JHU-000537_05m.jpg	Valid							U2 test	N	N	U2 test	U2 test	Valid						Valid	train	train	train	K test	train	Valid
700	/opt/ImageBase/AWS_sync/cropped/aedes/aegypti/JHU-000537_01m.jpg	Valid							U2 test	N	N	U2 test	U2 test	Valid						Valid	train	train	train	K test	train	Valid
701	/opt/ImageBase/AWS_sync/cropped/aedes/aegypti/JHU-000537_03m.jpg	Valid							U2 test	N	N	U2 test	U2 test	Valid						Valid	train	train	train	K test	train	Valid
702	/opt/ImageBase/AWS_sync/cropped/aedes/aegypti/JHU-000537_02m.jpg	Valid							U2 test	N	N	U2 test	U2 test	Valid						Valid	train	train	train	K test	train	Valid
703	/opt/ImageBase/AWS_sync/cropped/aedes/aegypti/JHU-000618_05m.jpg	Valid							U2 test	N	N	U2 test	U2 test	Valid						Valid						Valid
704	/opt/ImageBase/AWS_sync/cropped/aedes/aegypti/JHU-000618_03m.jpg	Valid							U2 test	N	N	U2 test	U2 test	Valid						Valid						Valid
705	/opt/ImageBase/AWS_sync/cropped/aedes/aegypti/JHU-000618_04m.jpg	Valid							U2 test	N	N	U2 test	U2 test	Valid						Valid						Valid
706	/opt/ImageBase/AWS_sync/cropped/aedes/aegypti/JHU-000618_02m.jpg	Valid							U2 test	N	N	U2 test	U2 test	Valid						Valid						Valid
707	/opt/ImageBase/AWS_sync/cropped/aedes/aegypti/JHU-000618_01m.jpg	Valid							U2 test	N	N	U2 test	U2 test	Valid						Valid						Valid
708	/opt/ImageBase/AWS_sync/cropped/aedes/aegypti/JHU-000572_03m.jpg	Valid							U2 test	N	N	U2 test	U2 test	Valid	train	train	train	train	train	Valid						Valid
709	/opt/ImageBase/AWS_sync/cropped/aedes/aegypti/JHU-000572_02m.jpg	Valid							U2 test	N	N	U2 test	U2 test	Valid	train	train	train	train	train	Valid						Valid
710	/opt/ImageBase/AWS_sync/cropped/aedes/aegypti/JHU-000572_04m.jpg	Valid							U2 test	N	N	U2 test	U2 test	Valid	train	train	train	train	train	Valid						Valid
711	/opt/ImageBase/AWS_sync/cropped/aedes/aegypti/JHU-000572_05m.jpg	Valid							U2 test	N	N	U2 test	U2 test	Valid	train	train	train	train	train	Valid						Valid
712	/opt/ImageBase/AWS_sync/cropped/aedes/aegypti/JHU-000572_01m.jpg	Valid							U2 test	N	N	U2 test	U2 test	Valid	train	train	train	train	train	Valid						Valid
713	/opt/ImageBase/AWS_sync/cropped/aedes/aegypti/JHU-005986_04m.jpg	Valid							U2 test	N	N	U2 test	U2 test	Valid						Valid	train	train	train	K test	train	Valid
714	/opt/ImageBase/AWS_sync/cropped/aedes/aegypti/JHU-005986_01m.jpg	Valid							U2 test	N	N	U2 test	U2 test	Valid						Valid	train	train	train	K test	train	Valid
715	/opt/ImageBase/AWS_sync/cropped/aedes/aegypti/JHU-005986_03m.jpg	Valid							U2 test	N	N	U2 test	U2 test	Valid						Valid	train	train	train	K test	train	Valid
716	/opt/ImageBase/AWS_sync/cropped/aedes/aegypti/JHU-005986_02m.jpg	Valid							U2 test	N	N	U2 test	U2 test	Valid						Valid	train	train	train	K test	train	Valid
717	/opt/ImageBase/AWS_sync/cropped/aedes/aegypti/JHU-005986_05m.jpg	Valid							U2 test	N	N	U2 test	U2 test	Valid						Valid	train	train	train	K test	train	Valid
718	/opt/ImageBase/AWS_sync/cropped/aedes/aegypti/JHU-000657_01m.jpg	Valid							U2 test	N	N	U2 test	U2 test	Valid						Valid						Valid
719	/opt/ImageBase/AWS_sync/cropped/aedes/aegypti/JHU-000657_05m.jpg	Valid							U2 test	N	N	U2 test	U2 test	Valid						Valid						Valid
720	/opt/ImageBase/AWS_sync/cropped/aedes/aegypti/JHU-000657_04m.jpg	Valid							U2 test	N	N	U2 test	U2 test	Valid						Valid						Valid
721	/opt/ImageBase/AWS_sync/cropped/aedes/aegypti/JHU-000657_03m.jpg	Valid							U2 test	N	N	U2 test	U2 test	Valid						Valid						Valid
722	/opt/ImageBase/AWS_sync/cropped/aedes/aegypti/JHU-000657_09m.jpg	Valid							U2 test	N	N	U2 test	U2 test	Valid						Valid						Valid
723	/opt/ImageBase/AWS_sync/cropped/aedes/aegypti/JHU-000657_02m.jpg	Valid							U2 test	N	N	U2 test	U2 test	Valid						Valid						Valid
724	/opt/ImageBase/AWS_sync/cropped/aedes/aegypti/JHU-000657_06m.jpg	Valid							U2 test	N	N	U2 test	U2 test	Valid						Valid						Valid
725	/opt/ImageBase/AWS_sync/cropped/aedes/aegypti/JHU-000657_08m.jpg	Valid							U2 test	N	N	U2 test	U2 test	Valid						Valid						Valid
726	/opt/ImageBase/AWS_sync/cropped/aedes/aegypti/JHU-000657_07m.jpg	Valid							U2 test	N	N	U2 test	U2 test	Valid						Valid						Valid
727	/opt/ImageBase/AWS_sync/cropped/aedes/aegypti/JHU-001915_03m.jpg	Valid							U2 test	N	N	U2 test	U2 test	Valid	train	train	train	train	train	Valid						Valid
728	/opt/ImageBase/AWS_sync/cropped/aedes/aegypti/JHU-001915_02m.jpg	Valid							U2 test	N	N	U2 test	U2 test	Valid	train	train	train	train	train	Valid						Valid
729	/opt/ImageBase/AWS_sync/cropped/aedes/aegypti/JHU-001915_05m.jpg	Valid							U2 test	N	N	U2 test	U2 test	Valid	train	train	train	train	train	Valid						Valid
730	/opt/ImageBase/AWS_sync/cropped/aedes/aegypti/JHU-001915_01m.jpg	Valid							U2 test	N	N	U2 test	U2 test	Valid	train	train	train	train	train	Valid						Valid
731	/opt/ImageBase/AWS_sync/cropped/aedes/aegypti/JHU-001915_04m.jpg	Valid							U2 test	N	N	U2 test	U2 test	Valid	train	train	train	train	train	Valid						Valid
732	/opt/ImageBase/AWS_sync/cropped/aedes/aegypti/JHU-000551_05m.jpg	Valid							U2 test	N	N	U2 test	U2 test	Valid						Valid						Valid
733	/opt/ImageBase/AWS_sync/cropped/aedes/aegypti/JHU-000551_02m.jpg	Valid							U2 test	N	N	U2 test	U2 test	Valid						Valid						Valid
734	/opt/ImageBase/AWS_sync/cropped/aedes/aegypti/JHU-000551_04m.jpg	Valid							U2 test	N	N	U2 test	U2 test	Valid						Valid						Valid
735	/opt/ImageBase/AWS_sync/cropped/aedes/aegypti/JHU-000551_01m.jpg	Valid							U2 test	N	N	U2 test	U2 test	Valid						Valid						Valid
736	/opt/ImageBase/AWS_sync/cropped/aedes/aegypti/JHU-000551_03m.jpg	Valid							U2 test	N	N	U2 test	U2 test	Valid						Valid						Valid
737	/opt/ImageBase/AWS_sync/cropped/aedes/aegypti/JHU-001857_04m.jpg	Valid							U2 test	N	N	U2 test	U2 test	Valid						Valid						Valid
738	/opt/ImageBase/AWS_sync/cropped/aedes/aegypti/JHU-001857_03m.jpg	Valid							U2 test	N	N	U2 test	U2 test	Valid						Valid						Valid
739	/opt/ImageBase/AWS_sync/cropped/aedes/aegypti/JHU-001857_01m.jpg	Valid							U2 test	N	N	U2 test	U2 test	Valid						Valid						Valid
740	/opt/ImageBase/AWS_sync/cropped/aedes/aegypti/JHU-001857_02m.jpg	Valid							U2 test	N	N	U2 test	U2 test	Valid						Valid						Valid
741	/opt/ImageBase/AWS_sync/cropped/aedes/aegypti/JHU-001857_05m.jpg	Valid							U2 test	N	N	U2 test	U2 test	Valid						Valid						Valid
742	/opt/ImageBase/AWS_sync/cropped/aedes/aegypti/JHU-000626_02m.jpg	Valid							U2 test	N	N	U2 test	U2 test	Valid						Valid						Valid
743	/opt/ImageBase/AWS_sync/cropped/aedes/aegypti/JHU-000626_01m.jpg	Valid							U2 test	N	N	U2 test	U2 test	Valid						Valid						Valid
744	/opt/ImageBase/AWS_sync/cropped/aedes/aegypti/JHU-000626_03m.jpg	Valid							U2 test	N	N	U2 test	U2 test	Valid						Valid						Valid
745	/opt/ImageBase/AWS_sync/cropped/aedes/aegypti/JHU-000626_04m.jpg	Valid							U2 test	N	N	U2 test	U2 test	Valid						Valid						Valid
746	/opt/ImageBase/AWS_sync/cropped/aedes/aegypti/JHU-000619_04m.jpg	Valid							U2 test	N	N	U2 test	U2 test	Valid						Valid	train	train	train	K test	train	Valid
747	/opt/ImageBase/AWS_sync/cropped/aedes/aegypti/JHU-000619_02m.jpg	Valid							U2 test	N	N	U2 test	U2 test	Valid						Valid	train	train	train	K test	train	Valid
748	/opt/ImageBase/AWS_sync/cropped/aedes/aegypti/JHU-000619_05m.jpg	Valid							U2 test	N	N	U2 test	U2 test	Valid						Valid	train	train	train	K test	train	Valid
749	/opt/ImageBase/AWS_sync/cropped/aedes/aegypti/JHU-000619_01m.jpg	Valid							U2 test	N	N	U2 test	U2 test	Valid						Valid	train	train	train	K test	train	Valid
750	/opt/ImageBase/AWS_sync/cropped/aedes/aegypti/JHU-000619_03m.jpg	Valid							U2 test	N	N	U2 test	U2 test	Valid						Valid	train	train	train	K test	train	Valid
751	/opt/ImageBase/AWS_sync/cropped/aedes/aegypti/JHU-000553_01m.jpg	Valid							U2 test	N	N	U2 test	U2 test	Valid	train	train	train	train	train	Valid	K test	K test	K test	K test	K test	Valid
752	/opt/ImageBase/AWS_sync/cropped/aedes/aegypti/JHU-000553_03m.jpg	Valid							U2 test	N	N	U2 test	U2 test	Valid	train	train	train	train	train	Valid	K test	K test	K test	K test	K test	Valid
753	/opt/ImageBase/AWS_sync/cropped/aedes/aegypti/JHU-000553_04m.jpg	Valid							U2 test	N	N	U2 test	U2 test	Valid	train	train	train	train	train	Valid	K test	K test	K test	K test	K test	Valid
754	/opt/ImageBase/AWS_sync/cropped/aedes/aegypti/JHU-000553_05m.jpg	Valid							U2 test	N	N	U2 test	U2 test	Valid	train	train	train	train	train	Valid	K test	K test	K test	K test	K test	Valid
755	/opt/ImageBase/AWS_sync/cropped/aedes/aegypti/JHU-000553_02m.jpg	Valid							U2 test	N	N	U2 test	U2 test	Valid	train	train	train	train	train	Valid	K test	K test	K test	K test	K test	Valid
756	/opt/ImageBase/AWS_sync/cropped/aedes/aegypti/JHU-005773_01m.jpg	Valid							U2 test	N	N	U2 test	U2 test	Valid						Valid						Valid
757	/opt/ImageBase/AWS_sync/cropped/aedes/aegypti/JHU-005773_05m.jpg	Valid							U2 test	N	N	U2 test	U2 test	Valid						Valid						Valid
758	/opt/ImageBase/AWS_sync/cropped/aedes/aegypti/JHU-005773_03m.jpg	Valid							U2 test	N	N	U2 test	U2 test	Valid						Valid						Valid
759	/opt/ImageBase/AWS_sync/cropped/aedes/aegypti/JHU-005773_06m.jpg	Valid							U2 test	N	N	U2 test	U2 test	Valid						Valid						Valid
760	/opt/ImageBase/AWS_sync/cropped/aedes/aegypti/JHU-005773_02m.jpg	Valid							U2 test	N	N	U2 test	U2 test	Valid						Valid						Valid
761	/opt/ImageBase/AWS_sync/cropped/aedes/aegypti/JHU-005773_04m.jpg	Valid							U2 test	N	N	U2 test	U2 test	Valid						Valid						Valid
762	/opt/ImageBase/AWS_sync/cropped/aedes/aegypti/JHU-000549_03m.jpg	Valid							U2 test	N	N	U2 test	U2 test	Valid						Valid						Valid
763	/opt/ImageBase/AWS_sync/cropped/aedes/aegypti/JHU-000549_04m.jpg	Valid							U2 test	N	N	U2 test	U2 test	Valid						Valid						Valid
764	/opt/ImageBase/AWS_sync/cropped/aedes/aegypti/JHU-000549_01m.jpg	Valid							U2 test	N	N	U2 test	U2 test	Valid						Valid						Valid
765	/opt/ImageBase/AWS_sync/cropped/aedes/aegypti/JHU-000549_02m.jpg	Valid							U2 test	N	N	U2 test	U2 test	Valid						Valid						Valid
766	/opt/ImageBase/AWS_sync/cropped/aedes/aegypti/JHU-005983_02m.jpg	Valid							U2 test	N	N	U2 test	U2 test	Valid						Valid						Valid
767	/opt/ImageBase/AWS_sync/cropped/aedes/aegypti/JHU-005983_03m.jpg	Valid							U2 test	N	N	U2 test	U2 test	Valid						Valid						Valid
768	/opt/ImageBase/AWS_sync/cropped/aedes/aegypti/JHU-005983_04m.jpg	Valid							U2 test	N	N	U2 test	U2 test	Valid						Valid						Valid
769	/opt/ImageBase/AWS_sync/cropped/aedes/aegypti/JHU-005983_01m.jpg	Valid							U2 test	N	N	U2 test	U2 test	Valid						Valid						Valid
770	/opt/ImageBase/AWS_sync/cropped/aedes/aegypti/JHU-001852_05m.jpg	Valid							U2 test	N	N	U2 test	U2 test	Valid						Valid						Valid
771	/opt/ImageBase/AWS_sync/cropped/aedes/aegypti/JHU-001852_04m.jpg	Valid							U2 test	N	N	U2 test	U2 test	Valid						Valid						Valid
772	/opt/ImageBase/AWS_sync/cropped/aedes/aegypti/JHU-001852_02m.jpg	Valid							U2 test	N	N	U2 test	U2 test	Valid						Valid						Valid
773	/opt/ImageBase/AWS_sync/cropped/aedes/aegypti/JHU-001852_01m.jpg	Valid							U2 test	N	N	U2 test	U2 test	Valid						Valid						Valid
774	/opt/ImageBase/AWS_sync/cropped/aedes/aegypti/JHU-001852_03m.jpg	Valid							U2 test	N	N	U2 test	U2 test	Valid						Valid						Valid
775	/opt/ImageBase/AWS_sync/cropped/aedes/aegypti/JHU-001858_01m.jpg	Valid							U2 test	N	N	U2 test	U2 test	Valid						Valid						Valid
776	/opt/ImageBase/AWS_sync/cropped/aedes/aegypti/JHU-001858_02m.jpg	Valid							U2 test	N	N	U2 test	U2 test	Valid						Valid						Valid
777	/opt/ImageBase/AWS_sync/cropped/aedes/aegypti/JHU-001858_05m.jpg	Valid							U2 test	N	N	U2 test	U2 test	Valid						Valid						Valid
778	/opt/ImageBase/AWS_sync/cropped/aedes/aegypti/JHU-001858_04m.jpg	Valid							U2 test	N	N	U2 test	U2 test	Valid						Valid						Valid
779	/opt/ImageBase/AWS_sync/cropped/aedes/aegypti/JHU-001858_03m.jpg	Valid							U2 test	N	N	U2 test	U2 test	Valid						Valid						Valid
780	/opt/ImageBase/AWS_sync/cropped/aedes/aegypti/JHU-001846_01m.jpg	Valid							U2 test	N	N	U2 test	U2 test	Valid	train	train	train	train	train	Valid						Valid
781	/opt/ImageBase/AWS_sync/cropped/aedes/aegypti/JHU-001846_04m.jpg	Valid							U2 test	N	N	U2 test	U2 test	Valid	train	train	train	train	train	Valid						Valid
782	/opt/ImageBase/AWS_sync/cropped/aedes/aegypti/JHU-001846_02m.jpg	Valid							U2 test	N	N	U2 test	U2 test	Valid	train	train	train	train	train	Valid						Valid
783	/opt/ImageBase/AWS_sync/cropped/aedes/aegypti/JHU-001846_03m.jpg	Valid							U2 test	N	N	U2 test	U2 test	Valid	train	train	train	train	train	Valid						Valid
784	/opt/ImageBase/AWS_sync/cropped/aedes/aegypti/JHU-001846_05m.jpg	Valid							U2 test	N	N	U2 test	U2 test	Valid	train	train	train	train	train	Valid						Valid
785	/opt/ImageBase/AWS_sync/cropped/aedes/aegypti/JHU-000541_04m.jpg	Valid							U2 test	N	N	U2 test	U2 test	Valid						Valid						Valid
786	/opt/ImageBase/AWS_sync/cropped/aedes/aegypti/JHU-000541_03m.jpg	Valid							U2 test	N	N	U2 test	U2 test	Valid						Valid						Valid
787	/opt/ImageBase/AWS_sync/cropped/aedes/aegypti/JHU-000541_01m.jpg	Valid							U2 test	N	N	U2 test	U2 test	Valid						Valid						Valid
788	/opt/ImageBase/AWS_sync/cropped/aedes/aegypti/JHU-000541_02m.jpg	Valid							U2 test	N	N	U2 test	U2 test	Test						Valid						Valid
789	/opt/ImageBase/AWS_sync/cropped/aedes/aegypti/JHU-000538_02m.jpg	Valid							U2 test	N	N	U2 test	U2 test	Test						Test	train	K test	train	K test	K test	Valid
790	/opt/ImageBase/AWS_sync/cropped/aedes/aegypti/JHU-000538_03m.jpg	Valid							U2 test	N	N	U2 test	U2 test	Test						Test	train	K test	train	K test	K test	Valid
791	/opt/ImageBase/AWS_sync/cropped/aedes/aegypti/JHU-000538_04m.jpg	Valid							U2 test	N	N	U2 test	U2 test	Test						Test	train	K test	train	K test	K test	Valid
792	/opt/ImageBase/AWS_sync/cropped/aedes/aegypti/JHU-000538_05m.jpg	Valid							U2 test	N	N	U2 test	U2 test	Test						Test	train	K test	train	K test	K test	Valid
793	/opt/ImageBase/AWS_sync/cropped/aedes/aegypti/JHU-000538_01m.jpg	Valid							U2 test	N	N	U2 test	U2 test	Test						Test	train	K test	train	K test	K test	Valid
794	/opt/ImageBase/AWS_sync/cropped/aedes/aegypti/JHU-005973_04m.jpg	Test	K test	K test	K test	K test	K test		U2 test	N	N	U2 test	U2 test	Test						Test						Valid	train	train	train	train	train
795	/opt/ImageBase/AWS_sync/cropped/aedes/aegypti/JHU-005973_02m.jpg	Test	K test	K test	K test	K test	K test		U2 test	N	N	U2 test	U2 test	Test						Test						Test	train	train	train	train	train
796	/opt/ImageBase/AWS_sync/cropped/aedes/aegypti/JHU-005973_01m.jpg	Test	K test	K test	K test	K test	K test		U2 test	N	N	U2 test	U2 test	Test						Test						Test	train	train	train	train	train
797	/opt/ImageBase/AWS_sync/cropped/aedes/aegypti/JHU-005973_03m.jpg	Test	K test	K test	K test	K test	K test		U2 test	N	N	U2 test	U2 test	Test						Test						Test	train	train	train	train	train
798	/opt/ImageBase/AWS_sync/cropped/aedes/aegypti/JHU-005973_05m.jpg	Test	K test	K test	K test	K test	K test		U2 test	N	N	U2 test	U2 test	Test						Test						Test	train	train	train	train	train
799	/opt/ImageBase/AWS_sync/cropped/aedes/aegypti/JHU-000595_04m.jpg	Test	train	train	train	train	train		U2 test	N	N	U2 test	U2 test	Test						Test						Test
800	/opt/ImageBase/AWS_sync/cropped/aedes/aegypti/JHU-000595_03m.jpg	Test	train	train	train	train	train		U2 test	N	N	U2 test	U2 test	Test						Test						Test
801	/opt/ImageBase/AWS_sync/cropped/aedes/aegypti/JHU-000595_01m.jpg	Test	train	train	train	train	train		U2 test	N	N	U2 test	U2 test	Test						Test						Test
802	/opt/ImageBase/AWS_sync/cropped/aedes/aegypti/JHU-000595_02m.jpg	Test	train	train	train	train	train		U2 test	N	N	U2 test	U2 test	Test						Test						Test
803	/opt/ImageBase/AWS_sync/cropped/aedes/aegypti/JHU-005982_01m.jpg	Test	train	train	train	train	train		U2 test	N	N	U2 test	U2 test	Test						Test						Test
804	/opt/ImageBase/AWS_sync/cropped/aedes/aegypti/JHU-005982_03m.jpg	Test	train	train	train	train	train		U2 test	N	N	U2 test	U2 test	Test						Test						Test
805	/opt/ImageBase/AWS_sync/cropped/aedes/aegypti/JHU-005982_02m.jpg	Test	train	train	train	train	train		U2 test	N	N	U2 test	U2 test	Test						Test						Test
806	/opt/ImageBase/AWS_sync/cropped/aedes/aegypti/JHU-005982_04m.jpg	Test	train	train	train	train	train		U2 test	N	N	U2 test	U2 test	Test						Test						Test
807	/opt/ImageBase/AWS_sync/cropped/aedes/aegypti/JHU-005834_02m.jpg	Test	train	train	train	train	train		U2 test	N	N	U2 test	U2 test	Test						Test						Test
808	/opt/ImageBase/AWS_sync/cropped/aedes/aegypti/JHU-005834_05m.jpg	Test	train	train	train	train	train		U2 test	N	N	U2 test	U2 test	Test						Test						Test
809	/opt/ImageBase/AWS_sync/cropped/aedes/aegypti/JHU-005834_01m.jpg	Test	train	train	train	train	train		U2 test	N	N	U2 test	U2 test	Test						Test						Test
810	/opt/ImageBase/AWS_sync/cropped/aedes/aegypti/JHU-005834_04m.jpg	Test	train	train	train	train	train		U2 test	N	N	U2 test	U2 test	Test						Test						Test
811	/opt/ImageBase/AWS_sync/cropped/aedes/aegypti/JHU-005834_03m.jpg	Test	train	train	train	train	train		U2 test	N	N	U2 test	U2 test	Test						Test						Test
812	/opt/ImageBase/AWS_sync/cropped/aedes/aegypti/JHU-005844_02m.jpg	Test	K test	K test	K test	K test	K test		train	N	N	train	train	Test	K test	K test	K test	K test	K test	Test	train	train	train	train	train	Test
813	/opt/ImageBase/AWS_sync/cropped/aedes/aegypti/JHU-005844_04m.jpg	Test	K test	K test	K test	K test	K test		train	N	N	train	train	Test	K test	K test	K test	K test	K test	Test	train	train	train	train	train	Test
814	/opt/ImageBase/AWS_sync/cropped/aedes/aegypti/JHU-005844_01m.jpg	Test	K test	K test	K test	K test	K test		train	N	N	train	train	Test	K test	K test	K test	K test	K test	Test	train	train	train	train	train	Test
815	/opt/ImageBase/AWS_sync/cropped/aedes/aegypti/JHU-005844_05m.jpg	Test	K test	K test	K test	K test	K test		train	N	N	train	train	Test	K test	K test	K test	K test	K test	Test	train	train	train	train	train	Test
816	/opt/ImageBase/AWS_sync/cropped/aedes/aegypti/JHU-005844_06m.jpg	Test	K test	K test	K test	K test	K test		train	N	N	train	train	Test	K test	K test	K test	K test	K test	Test	train	train	train	train	train	Test
817	/opt/ImageBase/AWS_sync/cropped/aedes/aegypti/JHU-005844_03m.jpg	Test	K test	K test	K test	K test	K test		train	N	N	train	train	Test	K test	K test	K test	K test	K test	Test	train	train	train	train	train	Test
818	/opt/ImageBase/AWS_sync/cropped/aedes/aegypti/JHU-000569_02m.jpg	Test	train	train	train	train	train		U2 test	N	N	U2 test	U2 test	Test						Test						Test
819	/opt/ImageBase/AWS_sync/cropped/aedes/aegypti/JHU-000569_04m.jpg	Test	train	train	train	train	train		U2 test	N	N	U2 test	U2 test	Test						Test						Test
820	/opt/ImageBase/AWS_sync/cropped/aedes/aegypti/JHU-000569_05m.jpg	Test	train	train	train	train	train		U2 test	N	N	U2 test	U2 test	Test						Test						Test
821	/opt/ImageBase/AWS_sync/cropped/aedes/aegypti/JHU-000569_01m.jpg	Test	train	train	train	train	train		U2 test	N	N	U2 test	U2 test	Test						Test						Test
822	/opt/ImageBase/AWS_sync/cropped/aedes/aegypti/JHU-000569_03m.jpg	Test	train	train	train	train	train		U2 test	N	N	U2 test	U2 test	Test						Test						Test
823	/opt/ImageBase/AWS_sync/cropped/aedes/aegypti/JHU-005847_03m.jpg	Test	train	train	train	train	train		U2 test	N	N	U2 test	U2 test	Test						Test						Test
824	/opt/ImageBase/AWS_sync/cropped/aedes/aegypti/JHU-005847_01m.jpg	Test	train	train	train	train	train		U2 test	N	N	U2 test	U2 test	Test						Test						Test
825	/opt/ImageBase/AWS_sync/cropped/aedes/aegypti/JHU-005847_05m.jpg	Test	train	train	train	train	train		U2 test	N	N	U2 test	U2 test	Test						Test						Test
826	/opt/ImageBase/AWS_sync/cropped/aedes/aegypti/JHU-005847_04m.jpg	Test	train	train	train	train	train		U2 test	N	N	U2 test	U2 test	Test						Test						Test
827	/opt/ImageBase/AWS_sync/cropped/aedes/aegypti/JHU-005847_02m.jpg	Test	train	train	train	train	train		U2 test	N	N	U2 test	U2 test	Test						Test						Test
828	/opt/ImageBase/AWS_sync/cropped/aedes/aegypti/JHU-000546_03m.jpg	Test	train	train	train	train	train		U2 test	N	N	U2 test	U2 test	Test						Test						Test	train	train	train	train	train
829	/opt/ImageBase/AWS_sync/cropped/aedes/aegypti/JHU-000546_04m.jpg	Test	train	train	train	train	train		U2 test	N	N	U2 test	U2 test	Test						Test						Test	train	train	train	train	train
830	/opt/ImageBase/AWS_sync/cropped/aedes/aegypti/JHU-000546_02m.jpg	Test	train	train	train	train	train		U2 test	N	N	U2 test	U2 test	Test						Test						Test	train	train	train	train	train
831	/opt/ImageBase/AWS_sync/cropped/aedes/aegypti/JHU-000546_01m.jpg	Test	train	train	train	train	train		U2 test	N	N	U2 test	U2 test	Test						Test						Test	train	train	train	train	train
832	/opt/ImageBase/AWS_sync/cropped/aedes/aegypti/JHU-000579_02m.jpg	Test	train	train	train	train	train		U2 test	N	N	U2 test	U2 test	Test	train	train	train	train	train	Test						Test
833	/opt/ImageBase/AWS_sync/cropped/aedes/aegypti/JHU-000579_01m.jpg	Test	train	train	train	train	train		U2 test	N	N	U2 test	U2 test	Test	train	train	train	train	train	Test						Test
834	/opt/ImageBase/AWS_sync/cropped/aedes/aegypti/JHU-000579_04m.jpg	Test	train	train	train	train	train		U2 test	N	N	U2 test	U2 test	Test	train	train	train	train	train	Test						Test
835	/opt/ImageBase/AWS_sync/cropped/aedes/aegypti/JHU-000579_05m.jpg	Test	train	train	train	train	train		U2 test	N	N	U2 test	U2 test	Test	train	train	train	train	train	Test						Test
836	/opt/ImageBase/AWS_sync/cropped/aedes/aegypti/JHU-000579_03m.jpg	Test	train	train	train	train	train		U2 test	N	N	U2 test	U2 test	Test	train	train	train	train	train	Test						Test
837	/opt/ImageBase/AWS_sync/cropped/aedes/aegypti/JHU-000594_04m.jpg	Test	train	train	train	train	train		U2 test	N	N	U2 test	U2 test	Test						Test						Test
838	/opt/ImageBase/AWS_sync/cropped/aedes/aegypti/JHU-000594_03m.jpg	Test	train	train	train	train	train		U2 test	N	N	U2 test	U2 test	Test						Test						Test
839	/opt/ImageBase/AWS_sync/cropped/aedes/aegypti/JHU-000594_02m.jpg	Test	train	train	train	train	train		U2 test	N	N	U2 test	U2 test	Test						Test						Test
840	/opt/ImageBase/AWS_sync/cropped/aedes/aegypti/JHU-000594_01m.jpg	Test	train	train	train	train	train		U2 test	N	N	U2 test	U2 test	Test						Test						Test
841	/opt/ImageBase/AWS_sync/cropped/aedes/aegypti/JHU-000666_01m.jpg	Test	K test	K test	K test	K test	K test		U2 test	N	N	U2 test	U2 test	Test						Test						Test
842	/opt/ImageBase/AWS_sync/cropped/aedes/aegypti/JHU-000666_06m.jpg	Test	K test	K test	K test	K test	K test		U2 test	N	N	U2 test	U2 test	Test						Test						Test
843	/opt/ImageBase/AWS_sync/cropped/aedes/aegypti/JHU-000666_05m.jpg	Test	K test	K test	K test	K test	K test		U2 test	N	N	U2 test	U2 test	Test						Test						Test
844	/opt/ImageBase/AWS_sync/cropped/aedes/aegypti/JHU-000666_04m.jpg	Test	K test	K test	K test	K test	K test		U2 test	N	N	U2 test	U2 test	Test						Test						Test
845	/opt/ImageBase/AWS_sync/cropped/aedes/aegypti/JHU-000666_03m.jpg	Test	K test	K test	K test	K test	K test		U2 test	N	N	U2 test	U2 test	Test						Test						Test
846	/opt/ImageBase/AWS_sync/cropped/aedes/aegypti/JHU-000666_02m.jpg	Test	K test	K test	K test	K test	K test		U2 test	N	N	U2 test	U2 test	Test						Test						Test
847	/opt/ImageBase/AWS_sync/cropped/aedes/aegypti/JHU-000666_07m.jpg	Test	K test	K test	K test	K test	K test		U2 test	N	N	U2 test	U2 test	Test						Test						Test
848	/opt/ImageBase/AWS_sync/cropped/aedes/aegypti/JHU-000573_05m.jpg	Test	K test	train	train	train	train		U2 test	N	N	U2 test	U2 test	Test						Test						Test
849	/opt/ImageBase/AWS_sync/cropped/aedes/aegypti/JHU-000573_04m.jpg	Test	K test	train	train	train	train		U2 test	N	N	U2 test	U2 test	Test						Test						Test
850	/opt/ImageBase/AWS_sync/cropped/aedes/aegypti/JHU-000573_03m.jpg	Test	K test	train	train	train	train		U2 test	N	N	U2 test	U2 test	Test						Test						Test
851	/opt/ImageBase/AWS_sync/cropped/aedes/aegypti/JHU-000573_01m.jpg	Test	K test	train	train	train	train		U2 test	N	N	U2 test	U2 test	Test						Test						Test
852	/opt/ImageBase/AWS_sync/cropped/aedes/aegypti/JHU-000573_02m.jpg	Test	K test	train	train	train	train		U2 test	N	N	U2 test	U2 test	Test						Test						Test
853	/opt/ImageBase/AWS_sync/cropped/aedes/aegypti/JHU-000580_05m.jpg	Test	train	train	train	train	train		U2 test	N	N	U2 test	U2 test	Test	train	train	train	train	train	Test						Test
854	/opt/ImageBase/AWS_sync/cropped/aedes/aegypti/JHU-000580_04m.jpg	Test	train	train	train	train	train		U2 test	N	N	U2 test	U2 test	Test	train	train	train	train	train	Test						Test
855	/opt/ImageBase/AWS_sync/cropped/aedes/aegypti/JHU-000580_03m.jpg	Test	train	train	train	train	train		U2 test	N	N	U2 test	U2 test	Test	train	train	train	train	train	Test						Test
856	/opt/ImageBase/AWS_sync/cropped/aedes/aegypti/JHU-000580_02m.jpg	Test	train	train	train	train	train		U2 test	N	N	U2 test	U2 test	Test	train	train	train	train	train	Test						Test
857	/opt/ImageBase/AWS_sync/cropped/aedes/aegypti/JHU-000580_01m.jpg	Test	train	train	train	train	train		U2 test	N	N	U2 test	U2 test	Test	train	train	train	train	train	Test						Test
858	/opt/ImageBase/AWS_sync/cropped/aedes/aegypti/JHU-001851_05m.jpg	Test	train	train	train	train	train		U2 test	N	N	U2 test	U2 test	Test	K test	K test	K test	K test	K test	Test						Test
859	/opt/ImageBase/AWS_sync/cropped/aedes/aegypti/JHU-001851_02m.jpg	Test	train	train	train	train	train		U2 test	N	N	U2 test	U2 test	Test	K test	K test	K test	K test	K test	Test						Test
860	/opt/ImageBase/AWS_sync/cropped/aedes/aegypti/JHU-001851_04m.jpg	Test	train	train	train	train	train		U2 test	N	N	U2 test	U2 test	Test	K test	K test	K test	K test	K test	Test						Test
861	/opt/ImageBase/AWS_sync/cropped/aedes/aegypti/JHU-001851_01m.jpg	Test	train	train	train	train	train		U2 test	N	N	U2 test	U2 test	Test	K test	K test	K test	K test	K test	Test						Test
862	/opt/ImageBase/AWS_sync/cropped/aedes/aegypti/JHU-001851_03m.jpg	Test	train	train	train	train	train		U2 test	N	N	U2 test	U2 test	Test	K test	K test	K test	K test	K test	Test						Test
863	/opt/ImageBase/AWS_sync/cropped/aedes/aegypti/JHU-005850_05m.jpg	Test	K test	K test	K test	K test	K test		U2 test	N	N	U2 test	U2 test	Test						Test						Test
864	/opt/ImageBase/AWS_sync/cropped/aedes/aegypti/JHU-005850_03m.jpg	Test	K test	K test	K test	K test	K test		U2 test	N	N	U2 test	U2 test	Test						Test						Test
865	/opt/ImageBase/AWS_sync/cropped/aedes/aegypti/JHU-005850_04m.jpg	Test	K test	K test	K test	K test	K test		U2 test	N	N	U2 test	U2 test	Test						Test						Test
866	/opt/ImageBase/AWS_sync/cropped/aedes/aegypti/JHU-005850_01m.jpg	Test	K test	K test	K test	K test	K test		U2 test	N	N	U2 test	U2 test	Test						Test						Test
867	/opt/ImageBase/AWS_sync/cropped/aedes/aegypti/JHU-005850_02m.jpg	Test	K test	K test	K test	K test	K test		U2 test	N	N	U2 test	U2 test	Test						Test						Test
868	/opt/ImageBase/AWS_sync/cropped/aedes/aegypti/JHU-005974_03m.jpg	Test	K test	K test	K test	K test	K test		U2 test	N	N	U2 test	U2 test	Test						Test						Test
869	/opt/ImageBase/AWS_sync/cropped/aedes/aegypti/JHU-005974_01m.jpg	Test	K test	K test	K test	K test	K test		U2 test	N	N	U2 test	U2 test	Test						Test						Test
870	/opt/ImageBase/AWS_sync/cropped/aedes/aegypti/JHU-005974_02m.jpg	Test	K test	K test	K test	K test	K test		U2 test	N	N	U2 test	U2 test	Test						Test						Test
871	/opt/ImageBase/AWS_sync/cropped/aedes/aegypti/JHU-005974_04m.jpg	Test	K test	K test	K test	K test	K test		U2 test	N	N	U2 test	U2 test	Test						Test						Test
872	/opt/ImageBase/AWS_sync/cropped/aedes/aegypti/JHU-001867_03m.jpg	Test	train	train	train	train	train		U2 test	N	N	U2 test	U2 test	Test						Test						Test
873	/opt/ImageBase/AWS_sync/cropped/aedes/aegypti/JHU-001867_02m.jpg	Test	train	train	train	train	train		U2 test	N	N	U2 test	U2 test	Test						Test						Test
874	/opt/ImageBase/AWS_sync/cropped/aedes/aegypti/JHU-001867_01m.jpg	Test	train	train	train	train	train		U2 test	N	N	U2 test	U2 test	Test						Test						Test
875	/opt/ImageBase/AWS_sync/cropped/aedes/aegypti/JHU-001867_04m.jpg	Test	train	train	train	train	train		U2 test	N	N	U2 test	U2 test	Test						Test						Test
876	/opt/ImageBase/AWS_sync/cropped/aedes/aegypti/JHU-005848_03m.jpg	Test	train	train	train	train	train		U2 test	N	N	U2 test	U2 test	Test						Test						Test
877	/opt/ImageBase/AWS_sync/cropped/aedes/aegypti/JHU-005848_02m.jpg	Test	train	train	train	train	train		U2 test	N	N	U2 test	U2 test	Test						Test						Test
878	/opt/ImageBase/AWS_sync/cropped/aedes/aegypti/JHU-005848_01m.jpg	Test	train	train	train	train	train		U2 test	N	N	U2 test	U2 test	Test						Test						Test
879	/opt/ImageBase/AWS_sync/cropped/aedes/aegypti/JHU-005848_05m.jpg	Test	train	train	train	train	train		U2 test	N	N	U2 test	U2 test	Test						Test						Test
880	/opt/ImageBase/AWS_sync/cropped/aedes/aegypti/JHU-005848_04m.jpg	Test	train	train	train	train	train		U2 test	N	N	U2 test	U2 test	Test						Test						Test
881	/opt/ImageBase/AWS_sync/cropped/aedes/aegypti/JHU-007513_01m.jpg	Test	K test	K test	K test	K test	K test		U2 test	N	N	U2 test	U2 test	Test						Test						Test
882	/opt/ImageBase/AWS_sync/cropped/aedes/aegypti/JHU-007513_02m.jpg	Test	K test	K test	K test	K test	K test		U2 test	N	N	U2 test	U2 test	Test						Test						Test
883	/opt/ImageBase/AWS_sync/cropped/aedes/aegypti/JHU-007516_01m.jpg	Test	train	train	train	train	train		U2 test	N	N	U2 test	U2 test	Test						Test						Test
884	/opt/ImageBase/AWS_sync/cropped/aedes/aegypti/JHU-007516_02m.jpg	Test	train	train	train	train	train		U2 test	N	N	U2 test	U2 test	Test						Test						Test
885	/opt/ImageBase/AWS_sync/cropped/aedes/aegypti/JHU-007516_03m.jpg	Test	train	train	train	train	train		U2 test	N	N	U2 test	U2 test	Test						Test						Test
886	/opt/ImageBase/AWS_sync/cropped/aedes/aegypti/JHU-000591_02m.jpg	Test	K test	K test	K test	K test	K test		U2 test	N	N	U2 test	U2 test	Test	train	train	train	train	train	Test						Test	train	train	train	train	train
887	/opt/ImageBase/AWS_sync/cropped/aedes/aegypti/JHU-000591_04m.jpg	Test	K test	K test	K test	K test	K test		U2 test	N	N	U2 test	U2 test	Test	train	train	train	train	train	Test						Test	train	train	train	train	train
888	/opt/ImageBase/AWS_sync/cropped/aedes/aegypti/JHU-000591_03m.jpg	Test	K test	K test	K test	K test	K test		U2 test	N	N	U2 test	U2 test	Test	train	train	train	train	train	Test						Test	train	train	train	train	train
889	/opt/ImageBase/AWS_sync/cropped/aedes/aegypti/JHU-000591_01m.jpg	Test	K test	K test	K test	K test	K test		U2 test	N	N	U2 test	U2 test	Test	train	train	train	train	train	Test						Test	train	train	train	train	train
890	/opt/ImageBase/AWS_sync/cropped/aedes/aegypti/JHU-000591_05m.jpg	Test	K test	K test	K test	K test	K test		U2 test	N	N	U2 test	U2 test	Test	train	train	train	train	train	Test						Test	train	train	train	train	train
891	/opt/ImageBase/AWS_sync/cropped/aedes/aegypti/JHU-007515_03m.jpg	Test	K test	K test	K test	K test	K test		U2 test	N	N	U2 test	U2 test	Test						Test						Test
892	/opt/ImageBase/AWS_sync/cropped/aedes/aegypti/JHU-007515_01m.jpg	Test	K test	K test	K test	K test	K test		U2 test	N	N	U2 test	U2 test	Test						Test						Test
893	/opt/ImageBase/AWS_sync/cropped/aedes/aegypti/JHU-007515_02m.jpg	Test	K test	K test	K test	K test	K test		U2 test	N	N	U2 test	U2 test	Test						Test						Test
894	/opt/ImageBase/AWS_sync/cropped/aedes/aegypti/JHU-000609_01m.jpg	Test	train	train	train	train	train		U2 test	N	N	U2 test	U2 test	Test						Test						Test
895	/opt/ImageBase/AWS_sync/cropped/aedes/aegypti/JHU-000609_03m.jpg	Test	train	train	train	train	train		U2 test	N	N	U2 test	U2 test	Test						Test						Test
896	/opt/ImageBase/AWS_sync/cropped/aedes/aegypti/JHU-000609_02m.jpg	Test	train	train	train	train	train		U2 test	N	N	U2 test	U2 test	Test						Test						Test
897	/opt/ImageBase/AWS_sync/cropped/aedes/aegypti/JHU-000609_04m.jpg	Test	train	train	train	train	train		U2 test	N	N	U2 test	U2 test	Test						Test						Test
898	/opt/ImageBase/AWS_sync/cropped/aedes/aegypti/JHU-000588_02m.jpg	Test	K test	K test	K test	K test	K test		U2 test	N	N	U2 test	U2 test	Test						Test						Test
899	/opt/ImageBase/AWS_sync/cropped/aedes/aegypti/JHU-000588_03m.jpg	Test	K test	K test	K test	K test	K test		U2 test	N	N	U2 test	U2 test	Test						Test						Test
900	/opt/ImageBase/AWS_sync/cropped/aedes/aegypti/JHU-000588_04m.jpg	Test	K test	K test	K test	K test	K test		U2 test	N	N	U2 test	U2 test	Test						Test						Test
901	/opt/ImageBase/AWS_sync/cropped/aedes/aegypti/JHU-000588_01m.jpg	Test	K test	K test	K test	K test	K test		U2 test	N	N	U2 test	U2 test	Test						Test						Test
902	/opt/ImageBase/AWS_sync/cropped/aedes/aegypti/JHU-000588_05m.jpg	Test	K test	K test	K test	K test	K test		U2 test	N	N	U2 test	U2 test	Test						Test						Test
903	/opt/ImageBase/AWS_sync/cropped/aedes/aegypti/JHU-000624_03m.jpg	Test	train	train	train	train	train		U2 test	N	N	U2 test	U2 test	Test						Test						Test	train	K test	train	train	train
904	/opt/ImageBase/AWS_sync/cropped/aedes/aegypti/JHU-000624_02m.jpg	Test	train	train	train	train	train		U2 test	N	N	U2 test	U2 test	Test						Test						Test	train	K test	train	train	train
905	/opt/ImageBase/AWS_sync/cropped/aedes/aegypti/JHU-000624_04m.jpg	Test	train	train	train	train	train		U2 test	N	N	U2 test	U2 test	Test						Test						Test	train	K test	train	train	train
906	/opt/ImageBase/AWS_sync/cropped/aedes/aegypti/JHU-000624_05m.jpg	Test	train	train	train	train	train		U2 test	N	N	U2 test	U2 test	Test						Test						Test	train	K test	train	train	train
907	/opt/ImageBase/AWS_sync/cropped/aedes/aegypti/JHU-000624_01m.jpg	Test	train	train	train	train	train		U2 test	N	N	U2 test	U2 test	Test						Test						Test	train	K test	train	train	train
908	/opt/ImageBase/AWS_sync/cropped/aedes/aegypti/JHU-001865_01m.jpg	Test	K test	K test	K test	K test	K test		U2 test	N	N	U2 test	U2 test	Test						Test						Test
909	/opt/ImageBase/AWS_sync/cropped/aedes/aegypti/JHU-001865_02m.jpg	Test	K test	K test	K test	K test	K test		U2 test	N	N	U2 test	U2 test	Test						Test						Test
910	/opt/ImageBase/AWS_sync/cropped/aedes/aegypti/JHU-001865_03m.jpg	Test	K test	K test	K test	K test	K test		U2 test	N	N	U2 test	U2 test	Test						Test						Test
911	/opt/ImageBase/AWS_sync/cropped/aedes/aegypti/JHU-001865_04m.jpg	Test	K test	K test	K test	K test	K test		U2 test	N	N	U2 test	U2 test	Test						Test						Test
912	/opt/ImageBase/AWS_sync/cropped/aedes/aegypti/JHU-000596_02m.jpg	Test	K test	K test	K test	K test	K test		U2 test	N	N	U2 test	U2 test	Test						Test						Test
913	/opt/ImageBase/AWS_sync/cropped/aedes/aegypti/JHU-000596_04m.jpg	Test	K test	K test	K test	K test	K test		U2 test	N	N	U2 test	U2 test	Test						Test						Test
914	/opt/ImageBase/AWS_sync/cropped/aedes/aegypti/JHU-000596_01m.jpg	Test	K test	K test	K test	K test	K test		U2 test	N	N	U2 test	U2 test	Test						Test						Test
915	/opt/ImageBase/AWS_sync/cropped/aedes/aegypti/JHU-000596_05m.jpg	Test	K test	K test	K test	K test	K test		U2 test	N	N	U2 test	U2 test	Test						Test						Test
916	/opt/ImageBase/AWS_sync/cropped/aedes/aegypti/JHU-000596_03m.jpg	Test	K test	K test	K test	K test	K test		U2 test	N	N	U2 test	U2 test	Test						Test						Test
917	/opt/ImageBase/AWS_sync/cropped/aedes/aegypti/JHU-000564_02m.jpg	Test	train	train	train	train	train		U2 test	N	N	U2 test	U2 test	Test						Test						Test
918	/opt/ImageBase/AWS_sync/cropped/aedes/aegypti/JHU-000564_01m.jpg	Test	train	train	train	train	train		U2 test	N	N	U2 test	U2 test	Test						Test						Test
919	/opt/ImageBase/AWS_sync/cropped/aedes/aegypti/JHU-000564_04m.jpg	Test	train	train	train	train	train		U2 test	N	N	U2 test	U2 test	Test						Test						Test
920	/opt/ImageBase/AWS_sync/cropped/aedes/aegypti/JHU-000564_03m.jpg	Test	train	train	train	train	train		U2 test	N	N	U2 test	U2 test	Test						Test						Test
921	/opt/ImageBase/AWS_sync/cropped/aedes/albopictus/JHU-000174_02m.jpg	Train						Train							N	U2 test	U2 test	U2 test	N	Train	train	train	train	train	train	Train
922	/opt/ImageBase/AWS_sync/cropped/aedes/albopictus/JHU-000174_01m.jpg	Train						Train							N	U2 test	U2 test	U2 test	N	Train	train	train	train	train	train	Train
923	/opt/ImageBase/AWS_sync/cropped/aedes/albopictus/JHU-000174_05m.jpg	Train						Train							N	U2 test	U2 test	U2 test	N	Train	train	train	train	train	train	Train
924	/opt/ImageBase/AWS_sync/cropped/aedes/albopictus/JHU-000174_04m.jpg	Train						Train							N	U2 test	U2 test	U2 test	N	Train	train	train	train	train	train	Train
925	/opt/ImageBase/AWS_sync/cropped/aedes/albopictus/JHU-000174_03m.jpg	Train						Train							N	U2 test	U2 test	U2 test	N	Train	train	train	train	train	train	Train
926	/opt/ImageBase/AWS_sync/cropped/aedes/albopictus/JHU-001392_03m.jpg	Train						Train							N	U2 test	U2 test	U2 test	N	Train						Train
927	/opt/ImageBase/AWS_sync/cropped/aedes/albopictus/JHU-001392_05m.jpg	Train						Train							N	U2 test	U2 test	U2 test	N	Train						Train
928	/opt/ImageBase/AWS_sync/cropped/aedes/albopictus/JHU-001392_02m.jpg	Train						Train							N	U2 test	U2 test	U2 test	N	Train						Train
929	/opt/ImageBase/AWS_sync/cropped/aedes/albopictus/JHU-001392_01m.jpg	Train						Train							N	U2 test	U2 test	U2 test	N	Train						Train
930	/opt/ImageBase/AWS_sync/cropped/aedes/albopictus/JHU-001392_06m.jpg	Train						Train							N	U2 test	U2 test	U2 test	N	Train						Train
931	/opt/ImageBase/AWS_sync/cropped/aedes/albopictus/JHU-001392_04m.jpg	Train						Train							N	U2 test	U2 test	U2 test	N	Train						Train
932	/opt/ImageBase/AWS_sync/cropped/aedes/albopictus/JHU-001483_04m.jpg	Train						Train							N	train	train	train	N	Train						Train
933	/opt/ImageBase/AWS_sync/cropped/aedes/albopictus/JHU-001483_05m.jpg	Train						Train							N	train	train	train	N	Train						Train
934	/opt/ImageBase/AWS_sync/cropped/aedes/albopictus/JHU-001483_03m.jpg	Train						Train							N	train	train	train	N	Train						Train
935	/opt/ImageBase/AWS_sync/cropped/aedes/albopictus/JHU-001483_01m.jpg	Train						Train							N	train	train	train	N	Train						Train
936	/opt/ImageBase/AWS_sync/cropped/aedes/albopictus/JHU-001483_02m.jpg	Train						Train							N	train	train	train	N	Train						Train
937	/opt/ImageBase/AWS_sync/cropped/aedes/albopictus/JHU-001406_03m.jpg	Train						Train							N	U2 test	U2 test	U2 test	N	Train						Train
938	/opt/ImageBase/AWS_sync/cropped/aedes/albopictus/JHU-001406_05m.jpg	Train						Train							N	U2 test	U2 test	U2 test	N	Train						Train
939	/opt/ImageBase/AWS_sync/cropped/aedes/albopictus/JHU-001406_01m.jpg	Train						Train							N	U2 test	U2 test	U2 test	N	Train						Train
940	/opt/ImageBase/AWS_sync/cropped/aedes/albopictus/JHU-001406_07m.jpg	Train						Train							N	U2 test	U2 test	U2 test	N	Train						Train
941	/opt/ImageBase/AWS_sync/cropped/aedes/albopictus/JHU-001406_06m.jpg	Train						Train							N	U2 test	U2 test	U2 test	N	Train						Train
942	/opt/ImageBase/AWS_sync/cropped/aedes/albopictus/JHU-001406_04m.jpg	Train						Train							N	U2 test	U2 test	U2 test	N	Train						Train
943	/opt/ImageBase/AWS_sync/cropped/aedes/albopictus/JHU-001406_02m.jpg	Train						Train							N	U2 test	U2 test	U2 test	N	Train						Train
944	/opt/ImageBase/AWS_sync/cropped/aedes/albopictus/JHU-001160_02m.jpg	Train						Train							N	U2 test	U2 test	U2 test	N	Train						Train	K test	K test	K test	K test	K test
945	/opt/ImageBase/AWS_sync/cropped/aedes/albopictus/JHU-001160_04m.jpg	Train						Train							N	U2 test	U2 test	U2 test	N	Train						Train	K test	K test	K test	K test	K test
946	/opt/ImageBase/AWS_sync/cropped/aedes/albopictus/JHU-001160_01m.jpg	Train						Train							N	U2 test	U2 test	U2 test	N	Train						Train	K test	K test	K test	K test	K test
947	/opt/ImageBase/AWS_sync/cropped/aedes/albopictus/JHU-001160_05m.jpg	Train						Train							N	U2 test	U2 test	U2 test	N	Train						Train	K test	K test	K test	K test	K test
948	/opt/ImageBase/AWS_sync/cropped/aedes/albopictus/JHU-001160_03m.jpg	Train						Train							N	U2 test	U2 test	U2 test	N	Train						Train	K test	K test	K test	K test	K test
949	/opt/ImageBase/AWS_sync/cropped/aedes/albopictus/JHU-000382_05m.jpg	Train						Train							N	U2 test	U2 test	U2 test	N	Train						Train
950	/opt/ImageBase/AWS_sync/cropped/aedes/albopictus/JHU-000382_02m.jpg	Train						Train							N	U2 test	U2 test	U2 test	N	Train						Train
951	/opt/ImageBase/AWS_sync/cropped/aedes/albopictus/JHU-000382_01m.jpg	Train						Train							N	U2 test	U2 test	U2 test	N	Train						Train
952	/opt/ImageBase/AWS_sync/cropped/aedes/albopictus/JHU-000382_04m.jpg	Train						Train							N	U2 test	U2 test	U2 test	N	Train						Train
953	/opt/ImageBase/AWS_sync/cropped/aedes/albopictus/JHU-000382_03m.jpg	Train						Train							N	U2 test	U2 test	U2 test	N	Train						Train
954	/opt/ImageBase/AWS_sync/cropped/aedes/albopictus/JHU-000311_03m.jpg	Train						Train							N	U2 test	U2 test	U2 test	N	Train						Train
955	/opt/ImageBase/AWS_sync/cropped/aedes/albopictus/JHU-000311_04m.jpg	Train						Train							N	U2 test	U2 test	U2 test	N	Train						Train
956	/opt/ImageBase/AWS_sync/cropped/aedes/albopictus/JHU-000311_02m.jpg	Train						Train							N	U2 test	U2 test	U2 test	N	Train						Train
957	/opt/ImageBase/AWS_sync/cropped/aedes/albopictus/JHU-000311_01m.jpg	Train						Train							N	U2 test	U2 test	U2 test	N	Train						Train
958	/opt/ImageBase/AWS_sync/cropped/aedes/albopictus/JHU-001060_01m.jpg	Train						Train	K test	K test	K test	K test	K test		N	U2 test	U2 test	U2 test	N	Train						Train
959	/opt/ImageBase/AWS_sync/cropped/aedes/albopictus/JHU-001060_02m.jpg	Train						Train	K test	K test	K test	K test	K test		N	U2 test	U2 test	U2 test	N	Train						Train
960	/opt/ImageBase/AWS_sync/cropped/aedes/albopictus/JHU-001060_03m.jpg	Train						Train	K test	K test	K test	K test	K test		N	U2 test	U2 test	U2 test	N	Train						Train
961	/opt/ImageBase/AWS_sync/cropped/aedes/albopictus/JHU-000369_01m.jpg	Train						Train							N	train	train	train	N	Train	K test	K test	K test	K test	K test	Train
962	/opt/ImageBase/AWS_sync/cropped/aedes/albopictus/JHU-000369_02m.jpg	Train						Train							N	train	train	train	N	Train	K test	K test	K test	K test	K test	Train
963	/opt/ImageBase/AWS_sync/cropped/aedes/albopictus/JHU-000369_03m.jpg	Train						Train							N	train	train	train	N	Train	K test	K test	K test	K test	K test	Train
964	/opt/ImageBase/AWS_sync/cropped/aedes/albopictus/JHU-000369_04m.jpg	Train						Train							N	train	train	train	N	Train	K test	K test	K test	K test	K test	Train
965	/opt/ImageBase/AWS_sync/cropped/aedes/albopictus/JHU-000306_04m.jpg	Train						Train							N	U2 test	U2 test	U2 test	N	Train						Train
966	/opt/ImageBase/AWS_sync/cropped/aedes/albopictus/JHU-000306_03m.jpg	Train						Train							N	U2 test	U2 test	U2 test	N	Train						Train
967	/opt/ImageBase/AWS_sync/cropped/aedes/albopictus/JHU-000306_02m.jpg	Train						Train							N	U2 test	U2 test	U2 test	N	Train						Train
968	/opt/ImageBase/AWS_sync/cropped/aedes/albopictus/JHU-000306_01m.jpg	Train						Train							N	U2 test	U2 test	U2 test	N	Train						Train
969	/opt/ImageBase/AWS_sync/cropped/aedes/albopictus/JHU-000245_02m.jpg	Train						Train							N	U2 test	U2 test	U2 test	N	Train						Train
970	/opt/ImageBase/AWS_sync/cropped/aedes/albopictus/JHU-000245_03m.jpg	Train						Train							N	U2 test	U2 test	U2 test	N	Train						Train
971	/opt/ImageBase/AWS_sync/cropped/aedes/albopictus/JHU-000245_04m.jpg	Train						Train							N	U2 test	U2 test	U2 test	N	Train						Train
972	/opt/ImageBase/AWS_sync/cropped/aedes/albopictus/JHU-000245_01m.jpg	Train						Train							N	U2 test	U2 test	U2 test	N	Train						Train
973	/opt/ImageBase/AWS_sync/cropped/aedes/albopictus/JHU-001411_03m.jpg	Train						Train							N	U2 test	U2 test	U2 test	N	Train	train	train	train	train	train	Train	train	train	train	train	train
974	/opt/ImageBase/AWS_sync/cropped/aedes/albopictus/JHU-001411_05m.jpg	Train						Train							N	U2 test	U2 test	U2 test	N	Train	train	train	train	train	train	Train	train	train	train	train	train
975	/opt/ImageBase/AWS_sync/cropped/aedes/albopictus/JHU-001411_01m.jpg	Train						Train							N	U2 test	U2 test	U2 test	N	Train	train	train	train	train	train	Train	train	train	train	train	train
976	/opt/ImageBase/AWS_sync/cropped/aedes/albopictus/JHU-001411_07m.jpg	Train						Train							N	U2 test	U2 test	U2 test	N	Train	train	train	train	train	train	Train	train	train	train	train	train
977	/opt/ImageBase/AWS_sync/cropped/aedes/albopictus/JHU-001411_06m.jpg	Train						Train							N	U2 test	U2 test	U2 test	N	Train	train	train	train	train	train	Train	train	train	train	train	train
978	/opt/ImageBase/AWS_sync/cropped/aedes/albopictus/JHU-001411_02m.jpg	Train						Train							N	U2 test	U2 test	U2 test	N	Train	train	train	train	train	train	Train	train	train	train	train	train
979	/opt/ImageBase/AWS_sync/cropped/aedes/albopictus/JHU-001411_04m.jpg	Train						Train							N	U2 test	U2 test	U2 test	N	Train	train	train	train	train	train	Train	train	train	train	train	train
980	/opt/ImageBase/AWS_sync/cropped/aedes/albopictus/JHU-000244_02m.jpg	Train						Train							N	U2 test	U2 test	U2 test	N	Train						Train
981	/opt/ImageBase/AWS_sync/cropped/aedes/albopictus/JHU-000244_05m.jpg	Train						Train							N	U2 test	U2 test	U2 test	N	Train						Train
982	/opt/ImageBase/AWS_sync/cropped/aedes/albopictus/JHU-000244_04m.jpg	Train						Train							N	U2 test	U2 test	U2 test	N	Train						Train
983	/opt/ImageBase/AWS_sync/cropped/aedes/albopictus/JHU-000244_03m.jpg	Train						Train							N	U2 test	U2 test	U2 test	N	Train						Train
984	/opt/ImageBase/AWS_sync/cropped/aedes/albopictus/JHU-000244_01m.jpg	Train						Train							N	U2 test	U2 test	U2 test	N	Train						Train
985	/opt/ImageBase/AWS_sync/cropped/aedes/albopictus/JHU-000257_04m.jpg	Train						Train	train	train	train	train	train		N	train	train	train	N	Train						Train
986	/opt/ImageBase/AWS_sync/cropped/aedes/albopictus/JHU-000257_01m.jpg	Train						Train	train	train	train	train	train		N	train	train	train	N	Train						Train
987	/opt/ImageBase/AWS_sync/cropped/aedes/albopictus/JHU-000257_03m.jpg	Train						Train	train	train	train	train	train		N	train	train	train	N	Train						Train
988	/opt/ImageBase/AWS_sync/cropped/aedes/albopictus/JHU-000257_02m.jpg	Train						Train	train	train	train	train	train		N	train	train	train	N	Train						Train
989	/opt/ImageBase/AWS_sync/cropped/aedes/albopictus/JHU-000292_01m.jpg	Train						Train							N	U2 test	U2 test	U2 test	N	Train						Train
990	/opt/ImageBase/AWS_sync/cropped/aedes/albopictus/JHU-000292_04m.jpg	Train						Train							N	U2 test	U2 test	U2 test	N	Train						Train
991	/opt/ImageBase/AWS_sync/cropped/aedes/albopictus/JHU-000292_05m.jpg	Train						Train							N	U2 test	U2 test	U2 test	N	Train						Train
992	/opt/ImageBase/AWS_sync/cropped/aedes/albopictus/JHU-000292_02m.jpg	Train						Train							N	U2 test	U2 test	U2 test	N	Train						Train
993	/opt/ImageBase/AWS_sync/cropped/aedes/albopictus/JHU-000292_03m.jpg	Train						Train							N	U2 test	U2 test	U2 test	N	Train						Train
994	/opt/ImageBase/AWS_sync/cropped/aedes/albopictus/JHU-001050_02m.jpg	Train						Train	K test	K test	K test	K test	K test		N	U2 test	U2 test	U2 test	N	Train						Train
995	/opt/ImageBase/AWS_sync/cropped/aedes/albopictus/JHU-001050_01m.jpg	Train						Train	K test	K test	K test	K test	K test		N	U2 test	U2 test	U2 test	N	Train						Train
996	/opt/ImageBase/AWS_sync/cropped/aedes/albopictus/JHU-000243_02m.jpg	Train						Train							N	U2 test	U2 test	U2 test	N	Train						Train
997	/opt/ImageBase/AWS_sync/cropped/aedes/albopictus/JHU-000243_03m.jpg	Train						Train							N	U2 test	U2 test	U2 test	N	Train						Train
998	/opt/ImageBase/AWS_sync/cropped/aedes/albopictus/JHU-000243_01m.jpg	Train						Train							N	U2 test	U2 test	U2 test	N	Train						Train
999	/opt/ImageBase/AWS_sync/cropped/aedes/albopictus/JHU-000243_04m.jpg	Train						Train							N	U2 test	U2 test	U2 test	N	Train						Train
1000	/opt/ImageBase/AWS_sync/cropped/aedes/albopictus/JHU-000393_04m.jpg	Train						Train							N	U2 test	U2 test	U2 test	N	Train						Train
1001	/opt/ImageBase/AWS_sync/cropped/aedes/albopictus/JHU-000393_02m.jpg	Train						Train							N	U2 test	U2 test	U2 test	N	Train						Train
1002	/opt/ImageBase/AWS_sync/cropped/aedes/albopictus/JHU-000393_01m.jpg	Train						Train							N	U2 test	U2 test	U2 test	N	Train						Train
1003	/opt/ImageBase/AWS_sync/cropped/aedes/albopictus/JHU-000393_03m.jpg	Train						Train							N	U2 test	U2 test	U2 test	N	Train						Train
1004	/opt/ImageBase/AWS_sync/cropped/aedes/albopictus/JHU-001398_01m.jpg	Train						Train							N	U2 test	U2 test	U2 test	N	Train	train	train	train	train	train	Train
1005	/opt/ImageBase/AWS_sync/cropped/aedes/albopictus/JHU-001398_04m.jpg	Train						Train							N	U2 test	U2 test	U2 test	N	Train	train	train	train	train	train	Train
1006	/opt/ImageBase/AWS_sync/cropped/aedes/albopictus/JHU-001398_05m.jpg	Train						Train							N	U2 test	U2 test	U2 test	N	Train	train	train	train	train	train	Train
1007	/opt/ImageBase/AWS_sync/cropped/aedes/albopictus/JHU-001398_03m.jpg	Train						Train							N	U2 test	U2 test	U2 test	N	Train	train	train	train	train	train	Train
1008	/opt/ImageBase/AWS_sync/cropped/aedes/albopictus/JHU-001398_02m.jpg	Train						Train							N	U2 test	U2 test	U2 test	N	Train	train	train	train	train	train	Train
1009	/opt/ImageBase/AWS_sync/cropped/aedes/albopictus/JHU-001398_06m.jpg	Train						Train							N	U2 test	U2 test	U2 test	N	Train	train	train	train	train	train	Train
1010	/opt/ImageBase/AWS_sync/cropped/aedes/albopictus/JHU-001526_01m.jpg	Train						Train							N	U2 test	U2 test	U2 test	N	Train						Train
1011	/opt/ImageBase/AWS_sync/cropped/aedes/albopictus/JHU-001526_03m.jpg	Train						Train							N	U2 test	U2 test	U2 test	N	Train						Train
1012	/opt/ImageBase/AWS_sync/cropped/aedes/albopictus/JHU-001526_02m.jpg	Train						Train							N	U2 test	U2 test	U2 test	N	Train						Train
1013	/opt/ImageBase/AWS_sync/cropped/aedes/albopictus/JHU-001526_04m.jpg	Train						Train							N	U2 test	U2 test	U2 test	N	Train						Train
1014	/opt/ImageBase/AWS_sync/cropped/aedes/albopictus/JHU-001526_05m.jpg	Train						Train							N	U2 test	U2 test	U2 test	N	Train						Train
1015	/opt/ImageBase/AWS_sync/cropped/aedes/albopictus/JHU-000368_04m.jpg	Train						Train							N	U2 test	U2 test	U2 test	N	Train						Train
1016	/opt/ImageBase/AWS_sync/cropped/aedes/albopictus/JHU-000368_01m.jpg	Train						Train							N	U2 test	U2 test	U2 test	N	Train						Train
1017	/opt/ImageBase/AWS_sync/cropped/aedes/albopictus/JHU-000368_02m.jpg	Train						Train							N	U2 test	U2 test	U2 test	N	Train						Train
1018	/opt/ImageBase/AWS_sync/cropped/aedes/albopictus/JHU-000368_03m.jpg	Train						Train							N	U2 test	U2 test	U2 test	N	Train						Train
1019	/opt/ImageBase/AWS_sync/cropped/aedes/albopictus/JHU-000253_01m.jpg	Train						Train							N	U2 test	U2 test	U2 test	N	Train						Train
1020	/opt/ImageBase/AWS_sync/cropped/aedes/albopictus/JHU-000253_02m.jpg	Train						Train							N	U2 test	U2 test	U2 test	N	Train						Train
1021	/opt/ImageBase/AWS_sync/cropped/aedes/albopictus/JHU-000253_04m.jpg	Train						Train							N	U2 test	U2 test	U2 test	N	Train						Train
1022	/opt/ImageBase/AWS_sync/cropped/aedes/albopictus/JHU-000253_03m.jpg	Train						Train							N	U2 test	U2 test	U2 test	N	Train						Train
1023	/opt/ImageBase/AWS_sync/cropped/aedes/albopictus/JHU-001091_02m.jpg	Train						Train							N	U2 test	U2 test	U2 test	N	Train						Train
1024	/opt/ImageBase/AWS_sync/cropped/aedes/albopictus/JHU-001091_04m.jpg	Train						Train							N	U2 test	U2 test	U2 test	N	Train						Train
1025	/opt/ImageBase/AWS_sync/cropped/aedes/albopictus/JHU-001091_03m.jpg	Train						Train							N	U2 test	U2 test	U2 test	N	Train						Train
1026	/opt/ImageBase/AWS_sync/cropped/aedes/albopictus/JHU-001091_01m.jpg	Train						Train							N	U2 test	U2 test	U2 test	N	Train						Train
1027	/opt/ImageBase/AWS_sync/cropped/aedes/albopictus/JHU-001059_01m.jpg	Train						Train	K test	K test	K test	K test	K test		N	U2 test	U2 test	U2 test	N	Train						Train
1028	/opt/ImageBase/AWS_sync/cropped/aedes/albopictus/JHU-001059_02m.jpg	Train						Train	K test	K test	K test	K test	K test		N	U2 test	U2 test	U2 test	N	Train						Train
1029	/opt/ImageBase/AWS_sync/cropped/aedes/albopictus/JHU-000505_02m.jpg	Train						Train							N	U2 test	U2 test	U2 test	N	Train						Train
1030	/opt/ImageBase/AWS_sync/cropped/aedes/albopictus/JHU-000505_03m.jpg	Train						Train							N	U2 test	U2 test	U2 test	N	Train						Train
1031	/opt/ImageBase/AWS_sync/cropped/aedes/albopictus/JHU-000505_05m.jpg	Train						Train							N	U2 test	U2 test	U2 test	N	Train						Train
1032	/opt/ImageBase/AWS_sync/cropped/aedes/albopictus/JHU-000505_01m.jpg	Train						Train							N	U2 test	U2 test	U2 test	N	Train						Train
1033	/opt/ImageBase/AWS_sync/cropped/aedes/albopictus/JHU-000505_04m.jpg	Train						Train							N	U2 test	U2 test	U2 test	N	Train						Train
1034	/opt/ImageBase/AWS_sync/cropped/aedes/albopictus/JHU-001413_06m.jpg	Train						Train							N	U2 test	U2 test	U2 test	N	Train						Train
1035	/opt/ImageBase/AWS_sync/cropped/aedes/albopictus/JHU-001413_04m.jpg	Train						Train							N	U2 test	U2 test	U2 test	N	Train						Train
1036	/opt/ImageBase/AWS_sync/cropped/aedes/albopictus/JHU-001413_05m.jpg	Train						Train							N	U2 test	U2 test	U2 test	N	Train						Train
1037	/opt/ImageBase/AWS_sync/cropped/aedes/albopictus/JHU-001413_03m.jpg	Train						Train							N	U2 test	U2 test	U2 test	N	Train						Train
1038	/opt/ImageBase/AWS_sync/cropped/aedes/albopictus/JHU-001413_01m.jpg	Train						Train							N	U2 test	U2 test	U2 test	N	Train						Train
1039	/opt/ImageBase/AWS_sync/cropped/aedes/albopictus/JHU-001413_02m.jpg	Train						Train							N	U2 test	U2 test	U2 test	N	Train						Train
1040	/opt/ImageBase/AWS_sync/cropped/aedes/albopictus/JHU-001249_02m.jpg	Train						Train							N	U2 test	U2 test	U2 test	N	Train						Train
1041	/opt/ImageBase/AWS_sync/cropped/aedes/albopictus/JHU-001249_01m.jpg	Train						Train							N	U2 test	U2 test	U2 test	N	Train						Train
1042	/opt/ImageBase/AWS_sync/cropped/aedes/albopictus/JHU-001249_04m.jpg	Train						Train							N	U2 test	U2 test	U2 test	N	Train						Train
1043	/opt/ImageBase/AWS_sync/cropped/aedes/albopictus/JHU-001249_05m.jpg	Train						Train							N	U2 test	U2 test	U2 test	N	Train						Train
1044	/opt/ImageBase/AWS_sync/cropped/aedes/albopictus/JHU-001249_03m.jpg	Train						Train							N	U2 test	U2 test	U2 test	N	Train						Train
1045	/opt/ImageBase/AWS_sync/cropped/aedes/albopictus/JHU-000291_02m.jpg	Train						Train							N	U2 test	U2 test	U2 test	N	Train						Train
1046	/opt/ImageBase/AWS_sync/cropped/aedes/albopictus/JHU-000291_03m.jpg	Train						Train							N	U2 test	U2 test	U2 test	N	Train						Train
1047	/opt/ImageBase/AWS_sync/cropped/aedes/albopictus/JHU-000291_04m.jpg	Train						Train							N	U2 test	U2 test	U2 test	N	Train						Train
1048	/opt/ImageBase/AWS_sync/cropped/aedes/albopictus/JHU-000291_01m.jpg	Train						Train							N	U2 test	U2 test	U2 test	N	Train						Train
1049	/opt/ImageBase/AWS_sync/cropped/aedes/albopictus/JHU-000392_02m.jpg	Train						Train							N	U2 test	U2 test	U2 test	N	Train						Train
1050	/opt/ImageBase/AWS_sync/cropped/aedes/albopictus/JHU-000392_03m.jpg	Train						Train							N	U2 test	U2 test	U2 test	N	Train						Train
1051	/opt/ImageBase/AWS_sync/cropped/aedes/albopictus/JHU-000392_01m.jpg	Train						Train							N	U2 test	U2 test	U2 test	N	Train						Train
1052	/opt/ImageBase/AWS_sync/cropped/aedes/albopictus/JHU-000392_04m.jpg	Train						Train							N	U2 test	U2 test	U2 test	N	Train						Train
1053	/opt/ImageBase/AWS_sync/cropped/aedes/albopictus/JHU-000247_01m.jpg	Train						Train							N	U2 test	U2 test	U2 test	N	Train	K test	K test	K test	K test	K test	Train
1054	/opt/ImageBase/AWS_sync/cropped/aedes/albopictus/JHU-000247_02m.jpg	Train						Train							N	U2 test	U2 test	U2 test	N	Train	K test	K test	K test	K test	K test	Train
1055	/opt/ImageBase/AWS_sync/cropped/aedes/albopictus/JHU-000247_03m.jpg	Train						Train							N	U2 test	U2 test	U2 test	N	Train	K test	K test	K test	K test	K test	Train
1056	/opt/ImageBase/AWS_sync/cropped/aedes/albopictus/JHU-000247_04m.jpg	Train						Train							N	U2 test	U2 test	U2 test	N	Train	K test	K test	K test	K test	K test	Train
1057	/opt/ImageBase/AWS_sync/cropped/aedes/albopictus/JHU-000246_02m.jpg	Train						Train							N	train	train	train	N	Train	K test	K test	K test	K test	K test	Train	train	train	train	train	train
1058	/opt/ImageBase/AWS_sync/cropped/aedes/albopictus/JHU-000246_04m.jpg	Train						Train							N	train	train	train	N	Train	K test	K test	K test	K test	K test	Train	train	train	train	train	train
1059	/opt/ImageBase/AWS_sync/cropped/aedes/albopictus/JHU-000246_05m.jpg	Train						Train							N	train	train	train	N	Train	K test	K test	K test	K test	K test	Train	train	train	train	train	train
1060	/opt/ImageBase/AWS_sync/cropped/aedes/albopictus/JHU-000246_01m.jpg	Train						Train							N	train	train	train	N	Train	K test	K test	K test	K test	K test	Train	train	train	train	train	train
1061	/opt/ImageBase/AWS_sync/cropped/aedes/albopictus/JHU-000246_03m.jpg	Train						Train							N	train	train	train	N	Train	K test	K test	K test	K test	K test	Train	train	train	train	train	train
1062	/opt/ImageBase/AWS_sync/cropped/aedes/albopictus/JHU-000409_03m.jpg	Train						Train							N	U2 test	U2 test	U2 test	N	Train						Train
1063	/opt/ImageBase/AWS_sync/cropped/aedes/albopictus/JHU-000409_01m.jpg	Train						Train							N	U2 test	U2 test	U2 test	N	Train						Train
1064	/opt/ImageBase/AWS_sync/cropped/aedes/albopictus/JHU-000409_04m.jpg	Train						Train							N	U2 test	U2 test	U2 test	N	Train						Train
1065	/opt/ImageBase/AWS_sync/cropped/aedes/albopictus/JHU-000409_02m.jpg	Train						Train							N	U2 test	U2 test	U2 test	N	Train						Train
1066	/opt/ImageBase/AWS_sync/cropped/aedes/albopictus/JHU-001386_04m.jpg	Train						Train							N	U2 test	U2 test	U2 test	N	Train						Train
1067	/opt/ImageBase/AWS_sync/cropped/aedes/albopictus/JHU-001386_01m.jpg	Train						Train							N	U2 test	U2 test	U2 test	N	Train						Train
1068	/opt/ImageBase/AWS_sync/cropped/aedes/albopictus/JHU-001386_02m.jpg	Train						Train							N	U2 test	U2 test	U2 test	N	Train						Train
1069	/opt/ImageBase/AWS_sync/cropped/aedes/albopictus/JHU-001386_05m.jpg	Train						Train							N	U2 test	U2 test	U2 test	N	Train						Train
1070	/opt/ImageBase/AWS_sync/cropped/aedes/albopictus/JHU-001386_03m.jpg	Train						Train							N	U2 test	U2 test	U2 test	N	Train						Train
1071	/opt/ImageBase/AWS_sync/cropped/aedes/albopictus/JHU-001512_05m.jpg	Train						Train							N	U2 test	U2 test	U2 test	N	Train						Train
1072	/opt/ImageBase/AWS_sync/cropped/aedes/albopictus/JHU-001512_01m.jpg	Train						Train							N	U2 test	U2 test	U2 test	N	Train						Train
1073	/opt/ImageBase/AWS_sync/cropped/aedes/albopictus/JHU-001512_02m.jpg	Train						Train							N	U2 test	U2 test	U2 test	N	Train						Train
1074	/opt/ImageBase/AWS_sync/cropped/aedes/albopictus/JHU-001512_04m.jpg	Train						Train							N	U2 test	U2 test	U2 test	N	Train						Train
1075	/opt/ImageBase/AWS_sync/cropped/aedes/albopictus/JHU-001512_03m.jpg	Train						Train							N	U2 test	U2 test	U2 test	N	Train						Train
1076	/opt/ImageBase/AWS_sync/cropped/aedes/albopictus/JHU-000320_05m.jpg	Train						Train							N	U2 test	U2 test	U2 test	N	Train	train	train	train	train	train	Train	K test	K test	K test	K test	K test
1077	/opt/ImageBase/AWS_sync/cropped/aedes/albopictus/JHU-000320_02m.jpg	Train						Train							N	U2 test	U2 test	U2 test	N	Train	train	train	train	train	train	Train	K test	K test	K test	K test	K test
1078	/opt/ImageBase/AWS_sync/cropped/aedes/albopictus/JHU-000320_03m.jpg	Train						Train							N	U2 test	U2 test	U2 test	N	Train	train	train	train	train	train	Train	K test	K test	K test	K test	K test
1079	/opt/ImageBase/AWS_sync/cropped/aedes/albopictus/JHU-000320_04m.jpg	Train						Train							N	U2 test	U2 test	U2 test	N	Train	train	train	train	train	train	Train	K test	K test	K test	K test	K test
1080	/opt/ImageBase/AWS_sync/cropped/aedes/albopictus/JHU-000320_01m.jpg	Train						Train							N	U2 test	U2 test	U2 test	N	Train	train	train	train	train	train	Train	K test	K test	K test	K test	K test
1081	/opt/ImageBase/AWS_sync/cropped/aedes/albopictus/JHU-001433_06m.jpg	Train						Train							N	U2 test	U2 test	U2 test	N	Train						Train
1082	/opt/ImageBase/AWS_sync/cropped/aedes/albopictus/JHU-001433_03m.jpg	Train						Train							N	U2 test	U2 test	U2 test	N	Train						Train
1083	/opt/ImageBase/AWS_sync/cropped/aedes/albopictus/JHU-001433_01m.jpg	Train						Train							N	U2 test	U2 test	U2 test	N	Train						Train
1084	/opt/ImageBase/AWS_sync/cropped/aedes/albopictus/JHU-001433_04m.jpg	Train						Train							N	U2 test	U2 test	U2 test	N	Train						Train
1085	/opt/ImageBase/AWS_sync/cropped/aedes/albopictus/JHU-001433_02m.jpg	Train						Train							N	U2 test	U2 test	U2 test	N	Train						Train
1086	/opt/ImageBase/AWS_sync/cropped/aedes/albopictus/JHU-001433_05m.jpg	Train						Train							N	U2 test	U2 test	U2 test	N	Train						Train
1087	/opt/ImageBase/AWS_sync/cropped/aedes/albopictus/JHU-000402_02m.jpg	Train						Train							N	train	train	train	N	Train						Train
1088	/opt/ImageBase/AWS_sync/cropped/aedes/albopictus/JHU-000402_04m.jpg	Train						Train							N	train	train	train	N	Train						Train
1089	/opt/ImageBase/AWS_sync/cropped/aedes/albopictus/JHU-000402_01m.jpg	Train						Train							N	train	train	train	N	Train						Train
1090	/opt/ImageBase/AWS_sync/cropped/aedes/albopictus/JHU-000402_03m.jpg	Train						Train							N	train	train	train	N	Train						Train
1091	/opt/ImageBase/AWS_sync/cropped/aedes/albopictus/JHU-000323_01m.jpg	Train						Train							N	U2 test	U2 test	U2 test	N	Train						Train
1092	/opt/ImageBase/AWS_sync/cropped/aedes/albopictus/JHU-000323_04m.jpg	Train						Train							N	U2 test	U2 test	U2 test	N	Train						Train
1093	/opt/ImageBase/AWS_sync/cropped/aedes/albopictus/JHU-000323_03m.jpg	Train						Train							N	U2 test	U2 test	U2 test	N	Train						Train
1094	/opt/ImageBase/AWS_sync/cropped/aedes/albopictus/JHU-000323_02m.jpg	Train						Train							N	U2 test	U2 test	U2 test	N	Train						Train
1095	/opt/ImageBase/AWS_sync/cropped/aedes/albopictus/JHU-001487_04m.jpg	Train						Train							N	U2 test	U2 test	U2 test	N	Train						Train
1096	/opt/ImageBase/AWS_sync/cropped/aedes/albopictus/JHU-001487_01m.jpg	Train						Train							N	U2 test	U2 test	U2 test	N	Train						Train
1097	/opt/ImageBase/AWS_sync/cropped/aedes/albopictus/JHU-001487_03m.jpg	Train						Train							N	U2 test	U2 test	U2 test	N	Train						Train
1098	/opt/ImageBase/AWS_sync/cropped/aedes/albopictus/JHU-001487_02m.jpg	Train						Train							N	U2 test	U2 test	U2 test	N	Train						Train
1099	/opt/ImageBase/AWS_sync/cropped/aedes/albopictus/JHU-000408_01m.jpg	Train						Train							N	U2 test	U2 test	U2 test	N	Train						Train
1100	/opt/ImageBase/AWS_sync/cropped/aedes/albopictus/JHU-000408_02m.jpg	Train						Train							N	U2 test	U2 test	U2 test	N	Train						Train
1101	/opt/ImageBase/AWS_sync/cropped/aedes/albopictus/JHU-000408_03m.jpg	Train						Train							N	U2 test	U2 test	U2 test	N	Train						Train
1102	/opt/ImageBase/AWS_sync/cropped/aedes/albopictus/JHU-000408_04m.jpg	Train						Train							N	U2 test	U2 test	U2 test	N	Train						Train
1103	/opt/ImageBase/AWS_sync/cropped/aedes/albopictus/JHU-000321_04m.jpg	Train						Train							N	U2 test	U2 test	U2 test	N	Train						Train
1104	/opt/ImageBase/AWS_sync/cropped/aedes/albopictus/JHU-000321_02m.jpg	Train						Train							N	U2 test	U2 test	U2 test	N	Train						Train
1105	/opt/ImageBase/AWS_sync/cropped/aedes/albopictus/JHU-000321_05m.jpg	Train						Train							N	U2 test	U2 test	U2 test	N	Train						Train
1106	/opt/ImageBase/AWS_sync/cropped/aedes/albopictus/JHU-000321_01m.jpg	Train						Train							N	U2 test	U2 test	U2 test	N	Train						Train
1107	/opt/ImageBase/AWS_sync/cropped/aedes/albopictus/JHU-000321_03m.jpg	Train						Train							N	U2 test	U2 test	U2 test	N	Train						Train
1108	/opt/ImageBase/AWS_sync/cropped/aedes/albopictus/JHU-001407_05m.jpg	Train						Train							N	train	train	train	N	Train						Train	train	train	train	train	train
1109	/opt/ImageBase/AWS_sync/cropped/aedes/albopictus/JHU-001407_01m.jpg	Train						Train							N	train	train	train	N	Train						Train	train	train	train	train	train
1110	/opt/ImageBase/AWS_sync/cropped/aedes/albopictus/JHU-001407_06m.jpg	Train						Train							N	train	train	train	N	Train						Train	train	train	train	train	train
1111	/opt/ImageBase/AWS_sync/cropped/aedes/albopictus/JHU-001407_04m.jpg	Train						Train							N	train	train	train	N	Train						Train	train	train	train	train	train
1112	/opt/ImageBase/AWS_sync/cropped/aedes/albopictus/JHU-001407_02m.jpg	Train						Train							N	train	train	train	N	Train						Train	train	train	train	train	train
1113	/opt/ImageBase/AWS_sync/cropped/aedes/albopictus/JHU-001407_03m.jpg	Train						Train							N	train	train	train	N	Train						Train	train	train	train	train	train
1114	/opt/ImageBase/AWS_sync/cropped/aedes/albopictus/JHU-001395_02m.jpg	Train						Train							N	U2 test	U2 test	U2 test	N	Train						Train	train	train	train	train	train
1115	/opt/ImageBase/AWS_sync/cropped/aedes/albopictus/JHU-001395_01m.jpg	Train						Train							N	U2 test	U2 test	U2 test	N	Train						Train	train	train	train	train	train
1116	/opt/ImageBase/AWS_sync/cropped/aedes/albopictus/JHU-001395_04m.jpg	Train						Train							N	U2 test	U2 test	U2 test	N	Train						Train	train	train	train	train	train
1117	/opt/ImageBase/AWS_sync/cropped/aedes/albopictus/JHU-001395_05m.jpg	Train						Train							N	U2 test	U2 test	U2 test	N	Train						Train	train	train	train	train	train
1118	/opt/ImageBase/AWS_sync/cropped/aedes/albopictus/JHU-001395_03m.jpg	Train						Train							N	U2 test	U2 test	U2 test	N	Train						Train	train	train	train	train	train
1119	/opt/ImageBase/AWS_sync/cropped/aedes/albopictus/JHU-001395_06m.jpg	Train						Train							N	U2 test	U2 test	U2 test	N	Train						Train	train	train	train	train	train
1120	/opt/ImageBase/AWS_sync/cropped/aedes/albopictus/JHU-001061_02m.jpg	Train						Train							N	U2 test	U2 test	U2 test	N	Train						Train
1121	/opt/ImageBase/AWS_sync/cropped/aedes/albopictus/JHU-001061_01m.jpg	Train						Train							N	U2 test	U2 test	U2 test	N	Train						Train
1122	/opt/ImageBase/AWS_sync/cropped/aedes/albopictus/JHU-001061_03m.jpg	Train						Train							N	U2 test	U2 test	U2 test	N	Train						Train
1123	/opt/ImageBase/AWS_sync/cropped/aedes/albopictus/JHU-000370_05m.jpg	Train						Train							N	U2 test	U2 test	U2 test	N	Train						Train	train	train	train	train	train
1124	/opt/ImageBase/AWS_sync/cropped/aedes/albopictus/JHU-000370_04m.jpg	Train						Train							N	U2 test	U2 test	U2 test	N	Train						Train	train	train	train	train	train
1125	/opt/ImageBase/AWS_sync/cropped/aedes/albopictus/JHU-000370_01m.jpg	Train						Train							N	U2 test	U2 test	U2 test	N	Train						Train	train	train	train	train	train
1126	/opt/ImageBase/AWS_sync/cropped/aedes/albopictus/JHU-000370_02m.jpg	Train						Train							N	U2 test	U2 test	U2 test	N	Train						Train	train	train	train	train	train
1127	/opt/ImageBase/AWS_sync/cropped/aedes/albopictus/JHU-000370_03m.jpg	Train						Train							N	U2 test	U2 test	U2 test	N	Train						Train	train	train	train	train	train
1128	/opt/ImageBase/AWS_sync/cropped/aedes/albopictus/JHU-001231_03m.jpg	Train						Train							N	U2 test	U2 test	U2 test	N	Train						Train
1129	/opt/ImageBase/AWS_sync/cropped/aedes/albopictus/JHU-001231_04m.jpg	Train						Train							N	U2 test	U2 test	U2 test	N	Train						Train
1130	/opt/ImageBase/AWS_sync/cropped/aedes/albopictus/JHU-001231_05m.jpg	Train						Train							N	U2 test	U2 test	U2 test	N	Train						Train
1131	/opt/ImageBase/AWS_sync/cropped/aedes/albopictus/JHU-001231_02m.jpg	Train						Train							N	U2 test	U2 test	U2 test	N	Train						Train
1132	/opt/ImageBase/AWS_sync/cropped/aedes/albopictus/JHU-001231_01m.jpg	Train						Train							N	U2 test	U2 test	U2 test	N	Train						Train
1133	/opt/ImageBase/AWS_sync/cropped/aedes/albopictus/JHU-001399_02m.jpg	Train						Train							N	U2 test	U2 test	U2 test	N	Train						Train
1134	/opt/ImageBase/AWS_sync/cropped/aedes/albopictus/JHU-001399_03m.jpg	Train						Train							N	U2 test	U2 test	U2 test	N	Train						Train
1135	/opt/ImageBase/AWS_sync/cropped/aedes/albopictus/JHU-001399_05m.jpg	Train						Train							N	U2 test	U2 test	U2 test	N	Train						Train
1136	/opt/ImageBase/AWS_sync/cropped/aedes/albopictus/JHU-001399_01m.jpg	Train						Train							N	U2 test	U2 test	U2 test	N	Train						Train
1137	/opt/ImageBase/AWS_sync/cropped/aedes/albopictus/JHU-001399_04m.jpg	Train						Train							N	U2 test	U2 test	U2 test	N	Train						Train
1138	/opt/ImageBase/AWS_sync/cropped/aedes/albopictus/JHU-001399_06m.jpg	Train						Train							N	U2 test	U2 test	U2 test	N	Train						Train
1139	/opt/ImageBase/AWS_sync/cropped/aedes/albopictus/JHU-001431_03m.jpg	Train						Train							N	U2 test	U2 test	U2 test	N	Train						Train
1140	/opt/ImageBase/AWS_sync/cropped/aedes/albopictus/JHU-001431_01m.jpg	Train						Train							N	U2 test	U2 test	U2 test	N	Train						Train
1141	/opt/ImageBase/AWS_sync/cropped/aedes/albopictus/JHU-001431_04m.jpg	Train						Train							N	U2 test	U2 test	U2 test	N	Train						Train
1142	/opt/ImageBase/AWS_sync/cropped/aedes/albopictus/JHU-001431_05m.jpg	Train						Train							N	U2 test	U2 test	U2 test	N	Train						Train
1143	/opt/ImageBase/AWS_sync/cropped/aedes/albopictus/JHU-001431_02m.jpg	Train						Train							N	U2 test	U2 test	U2 test	N	Train						Train
1144	/opt/ImageBase/AWS_sync/cropped/aedes/albopictus/JHU-000399_03m.jpg	Train						Train	train	train	train	train	train		N	U2 test	U2 test	U2 test	N	Train	train	train	train	train	train	Train
1145	/opt/ImageBase/AWS_sync/cropped/aedes/albopictus/JHU-000399_01m.jpg	Train						Train	train	train	train	train	train		N	U2 test	U2 test	U2 test	N	Train	train	train	train	train	train	Train
1146	/opt/ImageBase/AWS_sync/cropped/aedes/albopictus/JHU-000399_02m.jpg	Train						Train	train	train	train	train	train		N	U2 test	U2 test	U2 test	N	Train	train	train	train	train	train	Train
1147	/opt/ImageBase/AWS_sync/cropped/aedes/albopictus/JHU-000399_04m.jpg	Train						Train	train	train	train	train	train		N	U2 test	U2 test	U2 test	N	Train	train	train	train	train	train	Train
1148	/opt/ImageBase/AWS_sync/cropped/aedes/albopictus/JHU-000380_01m.jpg	Train						Train							N	U2 test	U2 test	U2 test	N	Train						Train
1149	/opt/ImageBase/AWS_sync/cropped/aedes/albopictus/JHU-000380_02m.jpg	Train						Train							N	U2 test	U2 test	U2 test	N	Train						Train
1150	/opt/ImageBase/AWS_sync/cropped/aedes/albopictus/JHU-000380_04m.jpg	Train						Train							N	U2 test	U2 test	U2 test	N	Train						Train
1151	/opt/ImageBase/AWS_sync/cropped/aedes/albopictus/JHU-000380_03m.jpg	Train						Train							N	U2 test	U2 test	U2 test	N	Train						Train
1152	/opt/ImageBase/AWS_sync/cropped/aedes/albopictus/JHU-000403_01m.jpg	Train						Train							N	U2 test	U2 test	U2 test	N	Train						Train
1153	/opt/ImageBase/AWS_sync/cropped/aedes/albopictus/JHU-000403_02m.jpg	Train						Train							N	U2 test	U2 test	U2 test	N	Train						Train
1154	/opt/ImageBase/AWS_sync/cropped/aedes/albopictus/JHU-000403_04m.jpg	Train						Train							N	U2 test	U2 test	U2 test	N	Train						Train
1155	/opt/ImageBase/AWS_sync/cropped/aedes/albopictus/JHU-000403_03m.jpg	Train						Train							N	U2 test	U2 test	U2 test	N	Train						Train
1156	/opt/ImageBase/AWS_sync/cropped/aedes/albopictus/JHU-000312_04m.jpg	Train						Train							N	U2 test	U2 test	U2 test	N	Train						Train
1157	/opt/ImageBase/AWS_sync/cropped/aedes/albopictus/JHU-000312_01m.jpg	Train						Train							N	U2 test	U2 test	U2 test	N	Train						Train
1158	/opt/ImageBase/AWS_sync/cropped/aedes/albopictus/JHU-000312_03m.jpg	Train						Train							N	U2 test	U2 test	U2 test	N	Train						Train
1159	/opt/ImageBase/AWS_sync/cropped/aedes/albopictus/JHU-000312_02m.jpg	Train						Train							N	U2 test	U2 test	U2 test	N	Train						Train
1160	/opt/ImageBase/AWS_sync/cropped/aedes/albopictus/JHU-001293_02m.jpg	Train						Train							N	U2 test	U2 test	U2 test	N	Train	train	train	train	K test	train	Train
1161	/opt/ImageBase/AWS_sync/cropped/aedes/albopictus/JHU-001293_01m.jpg	Train						Train							N	U2 test	U2 test	U2 test	N	Train	train	train	train	K test	train	Train
1162	/opt/ImageBase/AWS_sync/cropped/aedes/albopictus/JHU-001293_06m.jpg	Train						Train							N	U2 test	U2 test	U2 test	N	Train	train	train	train	K test	train	Train
1163	/opt/ImageBase/AWS_sync/cropped/aedes/albopictus/JHU-001293_04m.jpg	Train						Train							N	U2 test	U2 test	U2 test	N	Train	train	train	train	K test	train	Train
1164	/opt/ImageBase/AWS_sync/cropped/aedes/albopictus/JHU-001293_05m.jpg	Train						Train							N	U2 test	U2 test	U2 test	N	Train	train	train	train	K test	train	Train
1165	/opt/ImageBase/AWS_sync/cropped/aedes/albopictus/JHU-001293_03m.jpg	Train						Train							N	U2 test	U2 test	U2 test	N	Train	train	train	train	K test	train	Train
1166	/opt/ImageBase/AWS_sync/cropped/aedes/albopictus/JHU-001036_02m.jpg	Train						Train							N	U2 test	U2 test	U2 test	N	Train						Train
1167	/opt/ImageBase/AWS_sync/cropped/aedes/albopictus/JHU-001036_01m.jpg	Train						Train							N	U2 test	U2 test	U2 test	N	Train						Train
1168	/opt/ImageBase/AWS_sync/cropped/aedes/albopictus/JHU-001036_03m.jpg	Train						Train							N	U2 test	U2 test	U2 test	N	Train						Train
1169	/opt/ImageBase/AWS_sync/cropped/aedes/albopictus/JHU-001194_02m.jpg	Train						Train	train	train	train	train	train		N	train	train	train	N	Train						Train
1170	/opt/ImageBase/AWS_sync/cropped/aedes/albopictus/JHU-001194_05m.jpg	Train						Train	train	train	train	train	train		N	train	train	train	N	Train						Train
1171	/opt/ImageBase/AWS_sync/cropped/aedes/albopictus/JHU-001194_03m.jpg	Train						Train	train	train	train	train	train		N	train	train	train	N	Train						Train
1172	/opt/ImageBase/AWS_sync/cropped/aedes/albopictus/JHU-001194_01m.jpg	Train						Train	train	train	train	train	train		N	train	train	train	N	Train						Train
1173	/opt/ImageBase/AWS_sync/cropped/aedes/albopictus/JHU-001194_04m.jpg	Train						Train	train	train	train	train	train		N	train	train	train	N	Train						Train
1174	/opt/ImageBase/AWS_sync/cropped/aedes/albopictus/JHU-000410_01m.jpg	Train						Train	K test	K test	K test	K test	K test		N	U2 test	U2 test	U2 test	N	Train	K test	K test	K test	K test	K test	Train
1175	/opt/ImageBase/AWS_sync/cropped/aedes/albopictus/JHU-000410_04m.jpg	Train						Train	K test	K test	K test	K test	K test		N	U2 test	U2 test	U2 test	N	Train	K test	K test	K test	K test	K test	Train
1176	/opt/ImageBase/AWS_sync/cropped/aedes/albopictus/JHU-000410_02m.jpg	Train						Train	K test	K test	K test	K test	K test		N	U2 test	U2 test	U2 test	N	Train	K test	K test	K test	K test	K test	Train
1177	/opt/ImageBase/AWS_sync/cropped/aedes/albopictus/JHU-000410_03m.jpg	Train						Train	K test	K test	K test	K test	K test		N	U2 test	U2 test	U2 test	N	Train	K test	K test	K test	K test	K test	Train
1178	/opt/ImageBase/AWS_sync/cropped/aedes/albopictus/JHU-001233_01m.jpg	Train						Train							N	U2 test	U2 test	U2 test	N	Train						Train	train	train	train	train	train
1179	/opt/ImageBase/AWS_sync/cropped/aedes/albopictus/JHU-001233_02m.jpg	Train						Train							N	U2 test	U2 test	U2 test	N	Train						Train	train	train	train	train	train
1180	/opt/ImageBase/AWS_sync/cropped/aedes/albopictus/JHU-001233_03m.jpg	Train						Train							N	U2 test	U2 test	U2 test	N	Train						Train	train	train	train	train	train
1181	/opt/ImageBase/AWS_sync/cropped/aedes/albopictus/JHU-001089_02m.jpg	Train						Train							N	U2 test	U2 test	U2 test	N	Train	K test	K test	K test	K test	K test	Train
1182	/opt/ImageBase/AWS_sync/cropped/aedes/albopictus/JHU-001089_01m.jpg	Train						Train							N	U2 test	U2 test	U2 test	N	Train	K test	K test	K test	K test	K test	Train
1183	/opt/ImageBase/AWS_sync/cropped/aedes/albopictus/JHU-001089_03m.jpg	Train						Train							N	U2 test	U2 test	U2 test	N	Train	K test	K test	K test	K test	K test	Train
1184	/opt/ImageBase/AWS_sync/cropped/aedes/albopictus/JHU-000331_01m.jpg	Train						Train							N	U2 test	U2 test	U2 test	N	Train						Train
1185	/opt/ImageBase/AWS_sync/cropped/aedes/albopictus/JHU-000331_05m.jpg	Train						Train							N	U2 test	U2 test	U2 test	N	Train						Train
1186	/opt/ImageBase/AWS_sync/cropped/aedes/albopictus/JHU-000331_03m.jpg	Train						Train							N	U2 test	U2 test	U2 test	N	Train						Train
1187	/opt/ImageBase/AWS_sync/cropped/aedes/albopictus/JHU-000331_04m.jpg	Train						Train							N	U2 test	U2 test	U2 test	N	Train						Train
1188	/opt/ImageBase/AWS_sync/cropped/aedes/albopictus/JHU-000331_02m.jpg	Train						Train							N	U2 test	U2 test	U2 test	N	Train						Train
1189	/opt/ImageBase/AWS_sync/cropped/aedes/albopictus/JHU-000266_05m.jpg	Train						Train	train	train	train	train	train		N	U2 test	U2 test	U2 test	N	Train						Train
1190	/opt/ImageBase/AWS_sync/cropped/aedes/albopictus/JHU-000266_01m.jpg	Train						Train	train	train	train	train	train		N	U2 test	U2 test	U2 test	N	Train						Train
1191	/opt/ImageBase/AWS_sync/cropped/aedes/albopictus/JHU-000266_02m.jpg	Train						Train	train	train	train	train	train		N	U2 test	U2 test	U2 test	N	Train						Train
1192	/opt/ImageBase/AWS_sync/cropped/aedes/albopictus/JHU-000266_04m.jpg	Train						Train	train	train	train	train	train		N	U2 test	U2 test	U2 test	N	Train						Train
1193	/opt/ImageBase/AWS_sync/cropped/aedes/albopictus/JHU-000266_03m.jpg	Train						Train	train	train	train	train	train		N	U2 test	U2 test	U2 test	N	Train						Train
1194	/opt/ImageBase/AWS_sync/cropped/aedes/albopictus/JHU-000270_06m.jpg	Train						Train							N	train	train	train	N	Train						Train
1195	/opt/ImageBase/AWS_sync/cropped/aedes/albopictus/JHU-000270_04m.jpg	Train						Train							N	train	train	train	N	Train						Train
1196	/opt/ImageBase/AWS_sync/cropped/aedes/albopictus/JHU-000270_05m.jpg	Train						Train							N	train	train	train	N	Train						Train
1197	/opt/ImageBase/AWS_sync/cropped/aedes/albopictus/JHU-000270_01m.jpg	Train						Train							N	train	train	train	N	Train						Train
1198	/opt/ImageBase/AWS_sync/cropped/aedes/albopictus/JHU-000270_02m.jpg	Train						Train							N	train	train	train	N	Train						Train
1199	/opt/ImageBase/AWS_sync/cropped/aedes/albopictus/JHU-000270_03m.jpg	Train						Train							N	train	train	train	N	Train						Train
1200	/opt/ImageBase/AWS_sync/cropped/aedes/albopictus/JHU-001427_03m.jpg	Train						Train							N	U2 test	U2 test	U2 test	N	Train						Train
1201	/opt/ImageBase/AWS_sync/cropped/aedes/albopictus/JHU-001427_01m.jpg	Train						Train							N	U2 test	U2 test	U2 test	N	Train						Train
1202	/opt/ImageBase/AWS_sync/cropped/aedes/albopictus/JHU-001427_04m.jpg	Train						Train							N	U2 test	U2 test	U2 test	N	Train						Train
1203	/opt/ImageBase/AWS_sync/cropped/aedes/albopictus/JHU-001427_05m.jpg	Train						Train							N	U2 test	U2 test	U2 test	N	Train						Train
1204	/opt/ImageBase/AWS_sync/cropped/aedes/albopictus/JHU-001427_02m.jpg	Train						Train							N	U2 test	U2 test	U2 test	N	Train						Train
1205	/opt/ImageBase/AWS_sync/cropped/aedes/albopictus/JHU-001108_05m.jpg	Train						Train							N	train	train	train	N	Train						Train	train	train	train	train	train
1206	/opt/ImageBase/AWS_sync/cropped/aedes/albopictus/JHU-001108_04m.jpg	Train						Train							N	train	train	train	N	Train						Train	train	train	train	train	train
1207	/opt/ImageBase/AWS_sync/cropped/aedes/albopictus/JHU-001108_03m.jpg	Train						Train							N	train	train	train	N	Train						Train	train	train	train	train	train
1208	/opt/ImageBase/AWS_sync/cropped/aedes/albopictus/JHU-001108_01m.jpg	Train						Train							N	train	train	train	N	Train						Train	train	train	train	train	train
1209	/opt/ImageBase/AWS_sync/cropped/aedes/albopictus/JHU-001108_02m.jpg	Train						Train							N	train	train	train	N	Train						Train	train	train	train	train	train
1210	/opt/ImageBase/AWS_sync/cropped/aedes/albopictus/JHU-001535_02m.jpg	Train						Train							N	train	train	train	N	Train						Train
1211	/opt/ImageBase/AWS_sync/cropped/aedes/albopictus/JHU-001535_03m.jpg	Train						Train							N	train	train	train	N	Train						Train
1212	/opt/ImageBase/AWS_sync/cropped/aedes/albopictus/JHU-001535_01m.jpg	Train						Train							N	train	train	train	N	Train						Train
1213	/opt/ImageBase/AWS_sync/cropped/aedes/albopictus/JHU-001187_05m.jpg	Train						Train							N	U2 test	U2 test	U2 test	N	Train						Train
1214	/opt/ImageBase/AWS_sync/cropped/aedes/albopictus/JHU-001187_03m.jpg	Train						Train							N	U2 test	U2 test	U2 test	N	Train						Train
1215	/opt/ImageBase/AWS_sync/cropped/aedes/albopictus/JHU-001187_01m.jpg	Train						Train							N	U2 test	U2 test	U2 test	N	Train						Train
1216	/opt/ImageBase/AWS_sync/cropped/aedes/albopictus/JHU-001187_04m.jpg	Train						Train							N	U2 test	U2 test	U2 test	N	Train						Train
1217	/opt/ImageBase/AWS_sync/cropped/aedes/albopictus/JHU-001187_02m.jpg	Train						Train							N	U2 test	U2 test	U2 test	N	Train						Train
1218	/opt/ImageBase/AWS_sync/cropped/aedes/albopictus/JHU-000391_02m.jpg	Train						Train							N	U2 test	U2 test	U2 test	N	Train						Train
1219	/opt/ImageBase/AWS_sync/cropped/aedes/albopictus/JHU-000391_05m.jpg	Train						Train							N	U2 test	U2 test	U2 test	N	Train						Train
1220	/opt/ImageBase/AWS_sync/cropped/aedes/albopictus/JHU-000391_03m.jpg	Train						Train							N	U2 test	U2 test	U2 test	N	Train						Train
1221	/opt/ImageBase/AWS_sync/cropped/aedes/albopictus/JHU-000391_01m.jpg	Train						Train							N	U2 test	U2 test	U2 test	N	Train						Train
1222	/opt/ImageBase/AWS_sync/cropped/aedes/albopictus/JHU-000391_04m.jpg	Train						Train							N	U2 test	U2 test	U2 test	N	Train						Train
1223	/opt/ImageBase/AWS_sync/cropped/aedes/albopictus/JHU-001015_01m.jpg	Train						Train							N	U2 test	U2 test	U2 test	N	Train						Train
1224	/opt/ImageBase/AWS_sync/cropped/aedes/albopictus/JHU-001015_04m.jpg	Train						Train							N	U2 test	U2 test	U2 test	N	Train						Train
1225	/opt/ImageBase/AWS_sync/cropped/aedes/albopictus/JHU-001015_03m.jpg	Train						Train							N	U2 test	U2 test	U2 test	N	Train						Train
1226	/opt/ImageBase/AWS_sync/cropped/aedes/albopictus/JHU-001015_02m.jpg	Train						Train							N	U2 test	U2 test	U2 test	N	Train						Train
1227	/opt/ImageBase/AWS_sync/cropped/aedes/albopictus/JHU-000249_03m.jpg	Train						Train	train	train	train	train	train		N	U2 test	U2 test	U2 test	N	Train						Train
1228	/opt/ImageBase/AWS_sync/cropped/aedes/albopictus/JHU-000249_02m.jpg	Train						Train	train	train	train	train	train		N	U2 test	U2 test	U2 test	N	Train						Train
1229	/opt/ImageBase/AWS_sync/cropped/aedes/albopictus/JHU-000249_04m.jpg	Train						Train	train	train	train	train	train		N	U2 test	U2 test	U2 test	N	Train						Train
1230	/opt/ImageBase/AWS_sync/cropped/aedes/albopictus/JHU-000249_01m.jpg	Train						Train	train	train	train	train	train		N	U2 test	U2 test	U2 test	N	Train						Train
1231	/opt/ImageBase/AWS_sync/cropped/aedes/albopictus/JHU-000252_05m.jpg	Train						Train	K test	K test	K test	K test	K test		N	U2 test	U2 test	U2 test	N	Train						Train
1232	/opt/ImageBase/AWS_sync/cropped/aedes/albopictus/JHU-000252_01m.jpg	Train						Train	K test	K test	K test	K test	K test		N	U2 test	U2 test	U2 test	N	Train						Train
1233	/opt/ImageBase/AWS_sync/cropped/aedes/albopictus/JHU-000252_03m.jpg	Train						Train	K test	K test	K test	K test	K test		N	U2 test	U2 test	U2 test	N	Train						Train
1234	/opt/ImageBase/AWS_sync/cropped/aedes/albopictus/JHU-000252_04m.jpg	Train						Train	K test	K test	K test	K test	K test		N	U2 test	U2 test	U2 test	N	Train						Train
1235	/opt/ImageBase/AWS_sync/cropped/aedes/albopictus/JHU-000252_02m.jpg	Train						Train	K test	K test	K test	K test	K test		N	U2 test	U2 test	U2 test	N	Train						Train
1236	/opt/ImageBase/AWS_sync/cropped/aedes/albopictus/JHU-000231_04m.jpg	Train						Train							N	U2 test	U2 test	U2 test	N	Train						Train
1237	/opt/ImageBase/AWS_sync/cropped/aedes/albopictus/JHU-000231_03m.jpg	Train						Train							N	U2 test	U2 test	U2 test	N	Train						Train
1238	/opt/ImageBase/AWS_sync/cropped/aedes/albopictus/JHU-000231_02m.jpg	Train						Train							N	U2 test	U2 test	U2 test	N	Train						Train
1239	/opt/ImageBase/AWS_sync/cropped/aedes/albopictus/JHU-000231_01m.jpg	Train						Train							N	U2 test	U2 test	U2 test	N	Train						Train
1240	/opt/ImageBase/AWS_sync/cropped/aedes/albopictus/JHU-000231_05m.jpg	Train						Train							N	U2 test	U2 test	U2 test	N	Train						Train
1241	/opt/ImageBase/AWS_sync/cropped/aedes/albopictus/JHU-001420_03m.jpg	Train						Train							N	U2 test	U2 test	U2 test	N	Train						Train
1242	/opt/ImageBase/AWS_sync/cropped/aedes/albopictus/JHU-001420_04m.jpg	Train						Train							N	U2 test	U2 test	U2 test	N	Train						Train
1243	/opt/ImageBase/AWS_sync/cropped/aedes/albopictus/JHU-001420_01m.jpg	Train						Train							N	U2 test	U2 test	U2 test	N	Train						Train
1244	/opt/ImageBase/AWS_sync/cropped/aedes/albopictus/JHU-001420_02m.jpg	Train						Train							N	U2 test	U2 test	U2 test	N	Train						Train
1245	/opt/ImageBase/AWS_sync/cropped/aedes/albopictus/JHU-001420_05m.jpg	Train						Train							N	U2 test	U2 test	U2 test	N	Train						Train
1246	/opt/ImageBase/AWS_sync/cropped/aedes/albopictus/JHU-001263_05m.jpg	Train						Train							N	U2 test	U2 test	U2 test	N	Train						Train
1247	/opt/ImageBase/AWS_sync/cropped/aedes/albopictus/JHU-001263_04m.jpg	Train						Train							N	U2 test	U2 test	U2 test	N	Train						Train
1248	/opt/ImageBase/AWS_sync/cropped/aedes/albopictus/JHU-001263_02m.jpg	Train						Train							N	U2 test	U2 test	U2 test	N	Train						Train
1249	/opt/ImageBase/AWS_sync/cropped/aedes/albopictus/JHU-001263_01m.jpg	Train						Train							N	U2 test	U2 test	U2 test	N	Train						Train
1250	/opt/ImageBase/AWS_sync/cropped/aedes/albopictus/JHU-001263_03m.jpg	Train						Train							N	U2 test	U2 test	U2 test	N	Train						Train
1251	/opt/ImageBase/AWS_sync/cropped/aedes/albopictus/JHU-000347_01m.jpg	Train						Train							N	U2 test	U2 test	U2 test	N	Train						Train
1252	/opt/ImageBase/AWS_sync/cropped/aedes/albopictus/JHU-000347_03m.jpg	Train						Train							N	U2 test	U2 test	U2 test	N	Train						Train
1253	/opt/ImageBase/AWS_sync/cropped/aedes/albopictus/JHU-000347_02m.jpg	Train						Train							N	U2 test	U2 test	U2 test	N	Train						Train
1254	/opt/ImageBase/AWS_sync/cropped/aedes/albopictus/JHU-000347_04m.jpg	Train						Train							N	U2 test	U2 test	U2 test	N	Train						Train
1255	/opt/ImageBase/AWS_sync/cropped/aedes/albopictus/JHU-001510_01m.jpg	Train						Train	train	train	train	train	train		N	U2 test	U2 test	U2 test	N	Train						Train
1256	/opt/ImageBase/AWS_sync/cropped/aedes/albopictus/JHU-001510_02m.jpg	Train						Train	train	train	train	train	train		N	U2 test	U2 test	U2 test	N	Train						Train
1257	/opt/ImageBase/AWS_sync/cropped/aedes/albopictus/JHU-001510_03m.jpg	Train						Train	train	train	train	train	train		N	U2 test	U2 test	U2 test	N	Train						Train
1258	/opt/ImageBase/AWS_sync/cropped/aedes/albopictus/JHU-001485_04m.jpg	Train						Train							N	U2 test	U2 test	U2 test	N	Train						Train
1259	/opt/ImageBase/AWS_sync/cropped/aedes/albopictus/JHU-001485_05m.jpg	Train						Train							N	U2 test	U2 test	U2 test	N	Train						Train
1260	/opt/ImageBase/AWS_sync/cropped/aedes/albopictus/JHU-001485_02m.jpg	Train						Train							N	U2 test	U2 test	U2 test	N	Train						Train
1261	/opt/ImageBase/AWS_sync/cropped/aedes/albopictus/JHU-001485_01m.jpg	Train						Train							N	U2 test	U2 test	U2 test	N	Train						Train
1262	/opt/ImageBase/AWS_sync/cropped/aedes/albopictus/JHU-001485_03m.jpg	Train						Train							N	U2 test	U2 test	U2 test	N	Train						Train
1263	/opt/ImageBase/AWS_sync/cropped/aedes/albopictus/JHU-000322_02m.jpg	Train						Train							N	U2 test	U2 test	U2 test	N	Train						Train
1264	/opt/ImageBase/AWS_sync/cropped/aedes/albopictus/JHU-000322_01m.jpg	Train						Train							N	U2 test	U2 test	U2 test	N	Train						Train
1265	/opt/ImageBase/AWS_sync/cropped/aedes/albopictus/JHU-000322_03m.jpg	Train						Train							N	U2 test	U2 test	U2 test	N	Train						Train
1266	/opt/ImageBase/AWS_sync/cropped/aedes/albopictus/JHU-000322_04m.jpg	Train						Train							N	U2 test	U2 test	U2 test	N	Train						Train
1267	/opt/ImageBase/AWS_sync/cropped/aedes/albopictus/JHU-001516_01m.jpg	Train						Train							N	train	train	train	N	Train						Train
1268	/opt/ImageBase/AWS_sync/cropped/aedes/albopictus/JHU-001516_02m.jpg	Train						Train							N	train	train	train	N	Train						Train
1269	/opt/ImageBase/AWS_sync/cropped/aedes/albopictus/JHU-001516_05m.jpg	Train						Train							N	train	train	train	N	Train						Train
1270	/opt/ImageBase/AWS_sync/cropped/aedes/albopictus/JHU-001516_04m.jpg	Train						Train							N	train	train	train	N	Train						Train
1271	/opt/ImageBase/AWS_sync/cropped/aedes/albopictus/JHU-001516_03m.jpg	Train						Train							N	train	train	train	N	Train						Train
1272	/opt/ImageBase/AWS_sync/cropped/aedes/albopictus/JHU-001516_06m.jpg	Train						Train							N	train	train	train	N	Train						Train
1273	/opt/ImageBase/AWS_sync/cropped/aedes/albopictus/JHU-000307_02m.jpg	Train						Train	K test	K test	K test	K test	K test		N	U2 test	U2 test	U2 test	N	Train						Train
1274	/opt/ImageBase/AWS_sync/cropped/aedes/albopictus/JHU-000307_01m.jpg	Train						Train	K test	K test	K test	K test	K test		N	U2 test	U2 test	U2 test	N	Train						Train
1275	/opt/ImageBase/AWS_sync/cropped/aedes/albopictus/JHU-000307_04m.jpg	Train						Train	K test	K test	K test	K test	K test		N	U2 test	U2 test	U2 test	N	Train						Train
1276	/opt/ImageBase/AWS_sync/cropped/aedes/albopictus/JHU-000307_03m.jpg	Train						Train	K test	K test	K test	K test	K test		N	U2 test	U2 test	U2 test	N	Train						Train
1277	/opt/ImageBase/AWS_sync/cropped/aedes/albopictus/JHU-000401_01m.jpg	Train						Train	train	train	train	train	train		N	U2 test	U2 test	U2 test	N	Train						Train
1278	/opt/ImageBase/AWS_sync/cropped/aedes/albopictus/JHU-000401_04m.jpg	Train						Train	train	train	train	train	train		N	U2 test	U2 test	U2 test	N	Train						Train
1279	/opt/ImageBase/AWS_sync/cropped/aedes/albopictus/JHU-000401_03m.jpg	Train						Train	train	train	train	train	train		N	U2 test	U2 test	U2 test	N	Train						Train
1280	/opt/ImageBase/AWS_sync/cropped/aedes/albopictus/JHU-000401_05m.jpg	Train						Train	train	train	train	train	train		N	U2 test	U2 test	U2 test	N	Train						Train
1281	/opt/ImageBase/AWS_sync/cropped/aedes/albopictus/JHU-000401_02m.jpg	Train						Train	train	train	train	train	train		N	U2 test	U2 test	U2 test	N	Train						Train
1282	/opt/ImageBase/AWS_sync/cropped/aedes/albopictus/JHU-000175_01m.jpg	Train						Train	train	train	train	train	train		N	U2 test	U2 test	U2 test	N	Train						Train
1283	/opt/ImageBase/AWS_sync/cropped/aedes/albopictus/JHU-000175_04m.jpg	Train						Train	train	train	train	train	train		N	U2 test	U2 test	U2 test	N	Train						Train
1284	/opt/ImageBase/AWS_sync/cropped/aedes/albopictus/JHU-000175_02m.jpg	Train						Train	train	train	train	train	train		N	U2 test	U2 test	U2 test	N	Train						Train
1285	/opt/ImageBase/AWS_sync/cropped/aedes/albopictus/JHU-000175_03m.jpg	Train						Train	train	train	train	train	train		N	U2 test	U2 test	U2 test	N	Train						Train
1286	/opt/ImageBase/AWS_sync/cropped/aedes/albopictus/JHU-000389_05m.jpg	Train						Train							N	U2 test	U2 test	U2 test	N	Train						Train
1287	/opt/ImageBase/AWS_sync/cropped/aedes/albopictus/JHU-000389_03m.jpg	Train						Train							N	U2 test	U2 test	U2 test	N	Train						Train
1288	/opt/ImageBase/AWS_sync/cropped/aedes/albopictus/JHU-000389_02m.jpg	Train						Train							N	U2 test	U2 test	U2 test	N	Train						Train
1289	/opt/ImageBase/AWS_sync/cropped/aedes/albopictus/JHU-000389_04m.jpg	Train						Train							N	U2 test	U2 test	U2 test	N	Train						Train
1290	/opt/ImageBase/AWS_sync/cropped/aedes/albopictus/JHU-000389_01m.jpg	Train						Train							N	U2 test	U2 test	U2 test	N	Train						Train
1291	/opt/ImageBase/AWS_sync/cropped/aedes/albopictus/JHU-001119_02m.jpg	Train						Train							N	U2 test	U2 test	U2 test	N	Train						Train
1292	/opt/ImageBase/AWS_sync/cropped/aedes/albopictus/JHU-001119_03m.jpg	Train						Train							N	U2 test	U2 test	U2 test	N	Train						Train
1293	/opt/ImageBase/AWS_sync/cropped/aedes/albopictus/JHU-001119_01m.jpg	Train						Train							N	U2 test	U2 test	U2 test	N	Train						Train
1294	/opt/ImageBase/AWS_sync/cropped/aedes/albopictus/JHU-001119_04m.jpg	Train						Train							N	U2 test	U2 test	U2 test	N	Train						Train
1295	/opt/ImageBase/AWS_sync/cropped/aedes/albopictus/JHU-000269_01m.jpg	Train						Train							N	U2 test	U2 test	U2 test	N	Train						Train	train	train	train	train	train
1296	/opt/ImageBase/AWS_sync/cropped/aedes/albopictus/JHU-000269_02m.jpg	Train						Train							N	U2 test	U2 test	U2 test	N	Train						Train	train	train	train	train	train
1297	/opt/ImageBase/AWS_sync/cropped/aedes/albopictus/JHU-000269_05m.jpg	Train						Train							N	U2 test	U2 test	U2 test	N	Train						Train	train	train	train	train	train
1298	/opt/ImageBase/AWS_sync/cropped/aedes/albopictus/JHU-000269_04m.jpg	Train						Train							N	U2 test	U2 test	U2 test	N	Train						Train	train	train	train	train	train
1299	/opt/ImageBase/AWS_sync/cropped/aedes/albopictus/JHU-000269_06m.jpg	Train						Train							N	U2 test	U2 test	U2 test	N	Train						Train	train	train	train	train	train
1300	/opt/ImageBase/AWS_sync/cropped/aedes/albopictus/JHU-000269_03m.jpg	Train						Train							N	U2 test	U2 test	U2 test	N	Train						Train	train	train	train	train	train
1301	/opt/ImageBase/AWS_sync/cropped/aedes/albopictus/JHU-000407_01m.jpg	Train						Train							N	U2 test	U2 test	U2 test	N	Train						Train
1302	/opt/ImageBase/AWS_sync/cropped/aedes/albopictus/JHU-000407_05m.jpg	Train						Train							N	U2 test	U2 test	U2 test	N	Train						Train
1303	/opt/ImageBase/AWS_sync/cropped/aedes/albopictus/JHU-000407_03m.jpg	Train						Train							N	U2 test	U2 test	U2 test	N	Train						Train
1304	/opt/ImageBase/AWS_sync/cropped/aedes/albopictus/JHU-000407_04m.jpg	Train						Train							N	U2 test	U2 test	U2 test	N	Train						Train
1305	/opt/ImageBase/AWS_sync/cropped/aedes/albopictus/JHU-000407_02m.jpg	Train						Train							N	U2 test	U2 test	U2 test	N	Train						Train
1306	/opt/ImageBase/AWS_sync/cropped/aedes/albopictus/JHU-000262_01m.jpg	Train						Train							N	U2 test	U2 test	U2 test	N	Train	train	train	train	train	train	Train
1307	/opt/ImageBase/AWS_sync/cropped/aedes/albopictus/JHU-000262_05m.jpg	Train						Train							N	U2 test	U2 test	U2 test	N	Train	train	train	train	train	train	Train
1308	/opt/ImageBase/AWS_sync/cropped/aedes/albopictus/JHU-000262_04m.jpg	Train						Train							N	U2 test	U2 test	U2 test	N	Train	train	train	train	train	train	Train
1309	/opt/ImageBase/AWS_sync/cropped/aedes/albopictus/JHU-000262_03m.jpg	Train						Train							N	U2 test	U2 test	U2 test	N	Train	train	train	train	train	train	Train
1310	/opt/ImageBase/AWS_sync/cropped/aedes/albopictus/JHU-000262_02m.jpg	Train						Train							N	U2 test	U2 test	U2 test	N	Train	train	train	train	train	train	Train
1311	/opt/ImageBase/AWS_sync/cropped/aedes/albopictus/JHU-000397_03m.jpg	Train						Train							N	train	train	train	N	Train						Train
1312	/opt/ImageBase/AWS_sync/cropped/aedes/albopictus/JHU-000397_01m.jpg	Train						Train							N	train	train	train	N	Train						Train
1313	/opt/ImageBase/AWS_sync/cropped/aedes/albopictus/JHU-000397_02m.jpg	Train						Train							N	train	train	train	N	Train						Train
1314	/opt/ImageBase/AWS_sync/cropped/aedes/albopictus/JHU-000397_04m.jpg	Train						Train							N	train	train	train	N	Train						Train
1315	/opt/ImageBase/AWS_sync/cropped/aedes/albopictus/JHU-001230_01m.jpg	Train						Train	train	train	train	train	train		N	U2 test	U2 test	U2 test	N	Train						Train
1316	/opt/ImageBase/AWS_sync/cropped/aedes/albopictus/JHU-001230_02m.jpg	Train						Train	train	train	train	train	train		N	U2 test	U2 test	U2 test	N	Train						Train
1317	/opt/ImageBase/AWS_sync/cropped/aedes/albopictus/JHU-001230_06m.jpg	Train						Train	train	train	train	train	train		N	U2 test	U2 test	U2 test	N	Train						Train
1318	/opt/ImageBase/AWS_sync/cropped/aedes/albopictus/JHU-001230_03m.jpg	Train						Train	train	train	train	train	train		N	U2 test	U2 test	U2 test	N	Train						Train
1319	/opt/ImageBase/AWS_sync/cropped/aedes/albopictus/JHU-001230_04m.jpg	Train						Train	train	train	train	train	train		N	U2 test	U2 test	U2 test	N	Train						Train
1320	/opt/ImageBase/AWS_sync/cropped/aedes/albopictus/JHU-001230_05m.jpg	Train						Train	train	train	train	train	train		N	U2 test	U2 test	U2 test	N	Train						Train
1321	/opt/ImageBase/AWS_sync/cropped/aedes/albopictus/JHU-000261_02m.jpg	Train						Train							N	U2 test	U2 test	U2 test	N	Train						Train
1322	/opt/ImageBase/AWS_sync/cropped/aedes/albopictus/JHU-000261_01m.jpg	Train						Train							N	U2 test	U2 test	U2 test	N	Train						Train
1323	/opt/ImageBase/AWS_sync/cropped/aedes/albopictus/JHU-000261_03m.jpg	Train						Train							N	U2 test	U2 test	U2 test	N	Train						Train
1324	/opt/ImageBase/AWS_sync/cropped/aedes/albopictus/JHU-000261_04m.jpg	Train						Train							N	U2 test	U2 test	U2 test	N	Train						Train
1325	/opt/ImageBase/AWS_sync/cropped/aedes/albopictus/JHU-000261_05m.jpg	Train						Train							N	U2 test	U2 test	U2 test	N	Train						Train
1326	/opt/ImageBase/AWS_sync/cropped/aedes/albopictus/JHU-000216_04m.jpg	Train						Train							N	U2 test	U2 test	U2 test	N	Train	train	train	train	train	train	Train
1327	/opt/ImageBase/AWS_sync/cropped/aedes/albopictus/JHU-000216_01m.jpg	Train						Train							N	U2 test	U2 test	U2 test	N	Train	train	train	train	train	train	Train
1328	/opt/ImageBase/AWS_sync/cropped/aedes/albopictus/JHU-000216_02m.jpg	Train						Train							N	U2 test	U2 test	U2 test	N	Train	train	train	train	train	train	Train
1329	/opt/ImageBase/AWS_sync/cropped/aedes/albopictus/JHU-000216_03m.jpg	Train						Train							N	U2 test	U2 test	U2 test	N	Train	train	train	train	train	train	Train
1330	/opt/ImageBase/AWS_sync/cropped/aedes/albopictus/JHU-001533_04m.jpg	Train						Train							N	train	train	train	N	Train						Train
1331	/opt/ImageBase/AWS_sync/cropped/aedes/albopictus/JHU-001533_06m.jpg	Train						Train							N	train	train	train	N	Train						Train
1332	/opt/ImageBase/AWS_sync/cropped/aedes/albopictus/JHU-001533_01m.jpg	Train						Train							N	train	train	train	N	Train						Train
1333	/opt/ImageBase/AWS_sync/cropped/aedes/albopictus/JHU-001533_03m.jpg	Train						Train							N	train	train	train	N	Train						Train
1334	/opt/ImageBase/AWS_sync/cropped/aedes/albopictus/JHU-001533_02m.jpg	Train						Train							N	train	train	train	N	Train						Train
1335	/opt/ImageBase/AWS_sync/cropped/aedes/albopictus/JHU-001533_05m.jpg	Train						Train							N	train	train	train	N	Train						Train
1336	/opt/ImageBase/AWS_sync/cropped/aedes/albopictus/JHU-000504_03m.jpg	Train						Train							N	U2 test	U2 test	U2 test	N	Train						Train
1337	/opt/ImageBase/AWS_sync/cropped/aedes/albopictus/JHU-000504_04m.jpg	Train						Train							N	U2 test	U2 test	U2 test	N	Train						Train
1338	/opt/ImageBase/AWS_sync/cropped/aedes/albopictus/JHU-000504_05m.jpg	Train						Train							N	U2 test	U2 test	U2 test	N	Train						Train
1339	/opt/ImageBase/AWS_sync/cropped/aedes/albopictus/JHU-000504_02m.jpg	Train						Train							N	U2 test	U2 test	U2 test	N	Train						Train
1340	/opt/ImageBase/AWS_sync/cropped/aedes/albopictus/JHU-000504_01m.jpg	Train						Train							N	U2 test	U2 test	U2 test	N	Train						Train
1341	/opt/ImageBase/AWS_sync/cropped/aedes/albopictus/JHU-001546_07m.jpg	Train						Train	train	train	train	train	train		N	train	train	train	N	Train						Train
1342	/opt/ImageBase/AWS_sync/cropped/aedes/albopictus/JHU-001546_01m.jpg	Train						Train	train	train	train	train	train		N	train	train	train	N	Train						Train
1343	/opt/ImageBase/AWS_sync/cropped/aedes/albopictus/JHU-001546_02m.jpg	Train						Train	train	train	train	train	train		N	train	train	train	N	Train						Train
1344	/opt/ImageBase/AWS_sync/cropped/aedes/albopictus/JHU-001546_08m.jpg	Train						Train	train	train	train	train	train		N	train	train	train	N	Train						Train
1345	/opt/ImageBase/AWS_sync/cropped/aedes/albopictus/JHU-001546_04m.jpg	Train						Train	train	train	train	train	train		N	train	train	train	N	Train						Train
1346	/opt/ImageBase/AWS_sync/cropped/aedes/albopictus/JHU-001546_05m.jpg	Train						Train	train	train	train	train	train		N	train	train	train	N	Train						Train
1347	/opt/ImageBase/AWS_sync/cropped/aedes/albopictus/JHU-001546_03m.jpg	Train						Train	train	train	train	train	train		N	train	train	train	N	Train						Train
1348	/opt/ImageBase/AWS_sync/cropped/aedes/albopictus/JHU-001546_06m.jpg	Train						Train	train	train	train	train	train		N	train	train	train	N	Train						Train
1349	/opt/ImageBase/AWS_sync/cropped/aedes/albopictus/JHU-001188_03m.jpg	Train						Train							N	U2 test	U2 test	U2 test	N	Train						Train
1350	/opt/ImageBase/AWS_sync/cropped/aedes/albopictus/JHU-001188_05m.jpg	Train						Train							N	U2 test	U2 test	U2 test	N	Train						Train
1351	/opt/ImageBase/AWS_sync/cropped/aedes/albopictus/JHU-001188_02m.jpg	Train						Train							N	U2 test	U2 test	U2 test	N	Train						Train
1352	/opt/ImageBase/AWS_sync/cropped/aedes/albopictus/JHU-001188_04m.jpg	Train						Train							N	U2 test	U2 test	U2 test	N	Train						Train
1353	/opt/ImageBase/AWS_sync/cropped/aedes/albopictus/JHU-001188_01m.jpg	Train						Train							N	U2 test	U2 test	U2 test	N	Train						Train
1354	/opt/ImageBase/AWS_sync/cropped/aedes/albopictus/JHU-000373_02m.jpg	Train						Train							N	U2 test	U2 test	U2 test	N	Train						Train
1355	/opt/ImageBase/AWS_sync/cropped/aedes/albopictus/JHU-000373_03m.jpg	Train						Train							N	U2 test	U2 test	U2 test	N	Train						Train
1356	/opt/ImageBase/AWS_sync/cropped/aedes/albopictus/JHU-000373_01m.jpg	Train						Train							N	U2 test	U2 test	U2 test	N	Train						Train
1357	/opt/ImageBase/AWS_sync/cropped/aedes/albopictus/JHU-000373_04m.jpg	Train						Train							N	U2 test	U2 test	U2 test	N	Train						Train
1358	/opt/ImageBase/AWS_sync/cropped/aedes/albopictus/JHU-000213_02m.jpg	Train						Train							N	U2 test	U2 test	U2 test	N	Train						Train
1359	/opt/ImageBase/AWS_sync/cropped/aedes/albopictus/JHU-000213_04m.jpg	Train						Train							N	U2 test	U2 test	U2 test	N	Train						Train
1360	/opt/ImageBase/AWS_sync/cropped/aedes/albopictus/JHU-000213_01m.jpg	Train						Train							N	U2 test	U2 test	U2 test	N	Train						Train
1361	/opt/ImageBase/AWS_sync/cropped/aedes/albopictus/JHU-000213_03m.jpg	Train						Train							N	U2 test	U2 test	U2 test	N	Train						Train
1362	/opt/ImageBase/AWS_sync/cropped/aedes/albopictus/JHU-000265_02m.jpg	Train						Train							N	U2 test	U2 test	U2 test	N	Train						Train
1363	/opt/ImageBase/AWS_sync/cropped/aedes/albopictus/JHU-000265_04m.jpg	Train						Train							N	U2 test	U2 test	U2 test	N	Train						Train
1364	/opt/ImageBase/AWS_sync/cropped/aedes/albopictus/JHU-000265_01m.jpg	Train						Train							N	U2 test	U2 test	U2 test	N	Train						Train
1365	/opt/ImageBase/AWS_sync/cropped/aedes/albopictus/JHU-000265_03m.jpg	Train						Train							N	U2 test	U2 test	U2 test	N	Train						Train
1366	/opt/ImageBase/AWS_sync/cropped/aedes/albopictus/JHU-000265_05m.jpg	Train						Train							N	U2 test	U2 test	U2 test	N	Train						Train
1367	/opt/ImageBase/AWS_sync/cropped/aedes/albopictus/JHU-000265_06m.jpg	Train						Train							N	U2 test	U2 test	U2 test	N	Train						Train
1368	/opt/ImageBase/AWS_sync/cropped/aedes/albopictus/JHU-000520_03m.jpg	Train						Train							N	U2 test	U2 test	U2 test	N	Train	train	train	train	K test	train	Train
1369	/opt/ImageBase/AWS_sync/cropped/aedes/albopictus/JHU-000520_05m.jpg	Train						Train							N	U2 test	U2 test	U2 test	N	Train	train	train	train	K test	train	Train
1370	/opt/ImageBase/AWS_sync/cropped/aedes/albopictus/JHU-000520_04m.jpg	Train						Train							N	U2 test	U2 test	U2 test	N	Train	train	train	train	K test	train	Train
1371	/opt/ImageBase/AWS_sync/cropped/aedes/albopictus/JHU-000520_01m.jpg	Train						Train							N	U2 test	U2 test	U2 test	N	Train	train	train	train	K test	train	Train
1372	/opt/ImageBase/AWS_sync/cropped/aedes/albopictus/JHU-000520_02m.jpg	Train						Train							N	U2 test	U2 test	U2 test	N	Train	train	train	train	K test	train	Train
1373	/opt/ImageBase/AWS_sync/cropped/aedes/albopictus/JHU-001441_03m.jpg	Train						Train							N	U2 test	U2 test	U2 test	N	Train						Train	train	train	train	train	train
1374	/opt/ImageBase/AWS_sync/cropped/aedes/albopictus/JHU-001441_05m.jpg	Train						Train							N	U2 test	U2 test	U2 test	N	Train						Train	train	train	train	train	train
1375	/opt/ImageBase/AWS_sync/cropped/aedes/albopictus/JHU-001441_02m.jpg	Train						Train							N	U2 test	U2 test	U2 test	N	Train						Train	train	train	train	train	train
1376	/opt/ImageBase/AWS_sync/cropped/aedes/albopictus/JHU-001441_01m.jpg	Train						Train							N	U2 test	U2 test	U2 test	N	Train						Train	train	train	train	train	train
1377	/opt/ImageBase/AWS_sync/cropped/aedes/albopictus/JHU-001441_04m.jpg	Train						Train							N	U2 test	U2 test	U2 test	N	Train						Train	train	train	train	train	train
1378	/opt/ImageBase/AWS_sync/cropped/aedes/albopictus/JHU-000406_02m.jpg	Train						Train							N	train	train	train	N	Train	train	train	train	train	train	Train
1379	/opt/ImageBase/AWS_sync/cropped/aedes/albopictus/JHU-000406_01m.jpg	Train						Train							N	train	train	train	N	Train	train	train	train	train	train	Train
1380	/opt/ImageBase/AWS_sync/cropped/aedes/albopictus/JHU-000406_04m.jpg	Train						Train							N	train	train	train	N	Train	train	train	train	train	train	Train
1381	/opt/ImageBase/AWS_sync/cropped/aedes/albopictus/JHU-000406_03m.jpg	Train						Train							N	train	train	train	N	Train	train	train	train	train	train	Train
1382	/opt/ImageBase/AWS_sync/cropped/aedes/albopictus/JHU-001412_06m.jpg	Train						Train							N	U2 test	U2 test	U2 test	N	Train						Train
1383	/opt/ImageBase/AWS_sync/cropped/aedes/albopictus/JHU-001412_01m.jpg	Train						Train							N	U2 test	U2 test	U2 test	N	Train						Train
1384	/opt/ImageBase/AWS_sync/cropped/aedes/albopictus/JHU-001412_04m.jpg	Train						Train							N	U2 test	U2 test	U2 test	N	Train						Train
1385	/opt/ImageBase/AWS_sync/cropped/aedes/albopictus/JHU-001412_05m.jpg	Train						Train							N	U2 test	U2 test	U2 test	N	Train						Train
1386	/opt/ImageBase/AWS_sync/cropped/aedes/albopictus/JHU-001412_03m.jpg	Train						Train							N	U2 test	U2 test	U2 test	N	Train						Train
1387	/opt/ImageBase/AWS_sync/cropped/aedes/albopictus/JHU-001412_02m.jpg	Train						Train							N	U2 test	U2 test	U2 test	N	Train						Train
1388	/opt/ImageBase/AWS_sync/cropped/aedes/albopictus/JHU-001310_03m.jpg	Train						Train							N	U2 test	U2 test	U2 test	N	Train						Train
1389	/opt/ImageBase/AWS_sync/cropped/aedes/albopictus/JHU-001310_02m.jpg	Train						Train							N	U2 test	U2 test	U2 test	N	Train						Train
1390	/opt/ImageBase/AWS_sync/cropped/aedes/albopictus/JHU-001310_04m.jpg	Train						Train							N	U2 test	U2 test	U2 test	N	Train						Train
1391	/opt/ImageBase/AWS_sync/cropped/aedes/albopictus/JHU-001310_01m.jpg	Train						Train							N	U2 test	U2 test	U2 test	N	Train						Train
1392	/opt/ImageBase/AWS_sync/cropped/aedes/albopictus/JHU-001553_06m.jpg	Train						Train							N	train	train	train	N	Train						Train
1393	/opt/ImageBase/AWS_sync/cropped/aedes/albopictus/JHU-001553_04m.jpg	Train						Train							N	train	train	train	N	Train						Train
1394	/opt/ImageBase/AWS_sync/cropped/aedes/albopictus/JHU-001553_03m.jpg	Train						Train							N	train	train	train	N	Train						Train
1395	/opt/ImageBase/AWS_sync/cropped/aedes/albopictus/JHU-001553_01m.jpg	Train						Train							N	train	train	train	N	Train						Train
1396	/opt/ImageBase/AWS_sync/cropped/aedes/albopictus/JHU-001553_05m.jpg	Train						Train							N	train	train	train	N	Train						Train
1397	/opt/ImageBase/AWS_sync/cropped/aedes/albopictus/JHU-001553_02m.jpg	Train						Train							N	train	train	train	N	Train						Train
1398	/opt/ImageBase/AWS_sync/cropped/aedes/albopictus/JHU-000251_01m.jpg	Train						Train							N	U2 test	U2 test	U2 test	N	Train						Train	train	train	train	train	train
1399	/opt/ImageBase/AWS_sync/cropped/aedes/albopictus/JHU-000251_02m.jpg	Train						Train							N	U2 test	U2 test	U2 test	N	Train						Train	train	train	train	train	train
1400	/opt/ImageBase/AWS_sync/cropped/aedes/albopictus/JHU-000251_04m.jpg	Train						Train							N	U2 test	U2 test	U2 test	N	Train						Train	train	train	train	train	train
1401	/opt/ImageBase/AWS_sync/cropped/aedes/albopictus/JHU-000251_03m.jpg	Train						Train							N	U2 test	U2 test	U2 test	N	Train						Train	train	train	train	train	train
1402	/opt/ImageBase/AWS_sync/cropped/aedes/albopictus/JHU-000390_03m.jpg	Train						Train							N	U2 test	U2 test	U2 test	N	Train						Train
1403	/opt/ImageBase/AWS_sync/cropped/aedes/albopictus/JHU-000390_02m.jpg	Train						Train							N	U2 test	U2 test	U2 test	N	Train						Train
1404	/opt/ImageBase/AWS_sync/cropped/aedes/albopictus/JHU-000390_04m.jpg	Train						Train							N	U2 test	U2 test	U2 test	N	Train						Train
1405	/opt/ImageBase/AWS_sync/cropped/aedes/albopictus/JHU-000390_01m.jpg	Train						Train							N	U2 test	U2 test	U2 test	N	Train						Train
1406	/opt/ImageBase/AWS_sync/cropped/aedes/albopictus/JHU-000390_05m.jpg	Train						Train							N	U2 test	U2 test	U2 test	N	Train						Train
1407	/opt/ImageBase/AWS_sync/cropped/aedes/albopictus/JHU-000250_01m.jpg	Train						Train							N	U2 test	U2 test	U2 test	N	Train						Train
1408	/opt/ImageBase/AWS_sync/cropped/aedes/albopictus/JHU-000250_03m.jpg	Train						Train							N	U2 test	U2 test	U2 test	N	Train						Train
1409	/opt/ImageBase/AWS_sync/cropped/aedes/albopictus/JHU-000250_02m.jpg	Train						Train							N	U2 test	U2 test	U2 test	N	Train						Train
1410	/opt/ImageBase/AWS_sync/cropped/aedes/albopictus/JHU-000250_04m.jpg	Train						Train							N	U2 test	U2 test	U2 test	N	Valid						Train
1411	/opt/ImageBase/AWS_sync/cropped/aedes/albopictus/JHU-001183_05m.jpg	Valid						Train							N	U2 test	U2 test	U2 test	N	Valid						Train
1412	/opt/ImageBase/AWS_sync/cropped/aedes/albopictus/JHU-001183_01m.jpg	Valid						Train							N	U2 test	U2 test	U2 test	N	Valid						Train
1413	/opt/ImageBase/AWS_sync/cropped/aedes/albopictus/JHU-001183_03m.jpg	Valid						Train							N	U2 test	U2 test	U2 test	N	Valid						Train
1414	/opt/ImageBase/AWS_sync/cropped/aedes/albopictus/JHU-001183_04m.jpg	Valid						Train							N	U2 test	U2 test	U2 test	N	Valid						Train
1415	/opt/ImageBase/AWS_sync/cropped/aedes/albopictus/JHU-001183_02m.jpg	Valid						Train							N	U2 test	U2 test	U2 test	N	Valid						Valid
1416	/opt/ImageBase/AWS_sync/cropped/aedes/albopictus/JHU-001320_02m.jpg	Valid						Train							N	U2 test	U2 test	U2 test	N	Valid						Valid
1417	/opt/ImageBase/AWS_sync/cropped/aedes/albopictus/JHU-001320_05m.jpg	Valid						Train							N	U2 test	U2 test	U2 test	N	Valid						Valid
1418	/opt/ImageBase/AWS_sync/cropped/aedes/albopictus/JHU-001320_04m.jpg	Valid						Train							N	U2 test	U2 test	U2 test	N	Valid						Valid
1419	/opt/ImageBase/AWS_sync/cropped/aedes/albopictus/JHU-001320_01m.jpg	Valid						Valid							N	U2 test	U2 test	U2 test	N	Valid						Valid
1420	/opt/ImageBase/AWS_sync/cropped/aedes/albopictus/JHU-001320_03m.jpg	Valid						Valid							N	U2 test	U2 test	U2 test	N	Valid						Valid
1421	/opt/ImageBase/AWS_sync/cropped/aedes/albopictus/JHU-000248_01m.jpg	Valid						Valid							N	U2 test	U2 test	U2 test	N	Valid						Valid
1422	/opt/ImageBase/AWS_sync/cropped/aedes/albopictus/JHU-000248_03m.jpg	Valid						Valid							N	U2 test	U2 test	U2 test	N	Valid						Valid
1423	/opt/ImageBase/AWS_sync/cropped/aedes/albopictus/JHU-000248_02m.jpg	Valid						Valid							N	U2 test	U2 test	U2 test	N	Valid						Valid
1424	/opt/ImageBase/AWS_sync/cropped/aedes/albopictus/JHU-000248_04m.jpg	Valid						Valid							N	U2 test	U2 test	U2 test	N	Valid						Valid
1425	/opt/ImageBase/AWS_sync/cropped/aedes/albopictus/JHU-000215_04m.jpg	Valid						Valid	train	train	train	train	train		N	U2 test	U2 test	U2 test	N	Valid						Valid
1426	/opt/ImageBase/AWS_sync/cropped/aedes/albopictus/JHU-000215_03m.jpg	Valid						Valid	train	train	train	train	train		N	U2 test	U2 test	U2 test	N	Valid						Valid
1427	/opt/ImageBase/AWS_sync/cropped/aedes/albopictus/JHU-000215_02m.jpg	Valid						Valid	train	train	train	train	train		N	U2 test	U2 test	U2 test	N	Valid						Valid
1428	/opt/ImageBase/AWS_sync/cropped/aedes/albopictus/JHU-000215_01m.jpg	Valid						Valid	train	train	train	train	train		N	U2 test	U2 test	U2 test	N	Valid						Valid
1429	/opt/ImageBase/AWS_sync/cropped/aedes/albopictus/JHU-001491_03m.jpg	Valid						Valid							N	U2 test	U2 test	U2 test	N	Valid						Valid
1430	/opt/ImageBase/AWS_sync/cropped/aedes/albopictus/JHU-001491_02m.jpg	Valid						Valid							N	U2 test	U2 test	U2 test	N	Valid						Valid
1431	/opt/ImageBase/AWS_sync/cropped/aedes/albopictus/JHU-001491_01m.jpg	Valid						Valid							N	U2 test	U2 test	U2 test	N	Valid						Valid
1432	/opt/ImageBase/AWS_sync/cropped/aedes/albopictus/JHU-001491_04m.jpg	Valid						Valid							N	U2 test	U2 test	U2 test	N	Valid						Valid
1433	/opt/ImageBase/AWS_sync/cropped/aedes/albopictus/JHU-001491_05m.jpg	Valid						Valid							N	U2 test	U2 test	U2 test	N	Valid						Valid
1434	/opt/ImageBase/AWS_sync/cropped/aedes/albopictus/JHU-000404_04m.jpg	Valid						Valid							N	U2 test	U2 test	U2 test	N	Valid						Valid
1435	/opt/ImageBase/AWS_sync/cropped/aedes/albopictus/JHU-000404_03m.jpg	Valid						Valid							N	U2 test	U2 test	U2 test	N	Valid						Valid
1436	/opt/ImageBase/AWS_sync/cropped/aedes/albopictus/JHU-000404_02m.jpg	Valid						Valid							N	U2 test	U2 test	U2 test	N	Valid						Valid
1437	/opt/ImageBase/AWS_sync/cropped/aedes/albopictus/JHU-000404_01m.jpg	Valid						Valid							N	U2 test	U2 test	U2 test	N	Valid						Valid
1438	/opt/ImageBase/AWS_sync/cropped/aedes/albopictus/JHU-001077_02m.jpg	Valid						Valid							N	train	train	train	N	Valid						Valid
1439	/opt/ImageBase/AWS_sync/cropped/aedes/albopictus/JHU-001077_01m.jpg	Valid						Valid							N	train	train	train	N	Valid						Valid
1440	/opt/ImageBase/AWS_sync/cropped/aedes/albopictus/JHU-001077_03m.jpg	Valid						Valid							N	train	train	train	N	Valid						Valid
1441	/opt/ImageBase/AWS_sync/cropped/aedes/albopictus/JHU-000381_04m.jpg	Valid						Valid							N	U2 test	U2 test	U2 test	N	Valid						Valid
1442	/opt/ImageBase/AWS_sync/cropped/aedes/albopictus/JHU-000381_02m.jpg	Valid						Valid							N	U2 test	U2 test	U2 test	N	Valid						Valid
1443	/opt/ImageBase/AWS_sync/cropped/aedes/albopictus/JHU-000381_03m.jpg	Valid						Valid							N	U2 test	U2 test	U2 test	N	Valid						Valid
1444	/opt/ImageBase/AWS_sync/cropped/aedes/albopictus/JHU-000381_01m.jpg	Valid						Valid							N	U2 test	U2 test	U2 test	N	Valid						Valid
1445	/opt/ImageBase/AWS_sync/cropped/aedes/albopictus/JHU-001260_04m.jpg	Valid						Valid							N	U2 test	U2 test	U2 test	N	Valid						Valid
1446	/opt/ImageBase/AWS_sync/cropped/aedes/albopictus/JHU-001260_01m.jpg	Valid						Valid							N	U2 test	U2 test	U2 test	N	Valid						Valid
1447	/opt/ImageBase/AWS_sync/cropped/aedes/albopictus/JHU-001260_05m.jpg	Valid						Valid							N	U2 test	U2 test	U2 test	N	Valid						Valid
1448	/opt/ImageBase/AWS_sync/cropped/aedes/albopictus/JHU-001260_03m.jpg	Valid						Valid							N	U2 test	U2 test	U2 test	N	Valid						Valid
1449	/opt/ImageBase/AWS_sync/cropped/aedes/albopictus/JHU-001260_02m.jpg	Valid						Valid							N	U2 test	U2 test	U2 test	N	Valid						Valid
1450	/opt/ImageBase/AWS_sync/cropped/aedes/albopictus/JHU-001260_06m.jpg	Valid						Valid							N	U2 test	U2 test	U2 test	N	Valid						Valid
1451	/opt/ImageBase/AWS_sync/cropped/aedes/albopictus/JHU-000254_03m.jpg	Valid						Valid							N	U2 test	U2 test	U2 test	N	Valid	train	train	train	train	train	Valid	K test	K test	K test	K test	K test
1452	/opt/ImageBase/AWS_sync/cropped/aedes/albopictus/JHU-000254_04m.jpg	Valid						Valid							N	U2 test	U2 test	U2 test	N	Valid	train	train	train	train	train	Valid	K test	K test	K test	K test	K test
1453	/opt/ImageBase/AWS_sync/cropped/aedes/albopictus/JHU-000254_05m.jpg	Valid						Valid							N	U2 test	U2 test	U2 test	N	Valid	train	train	train	train	train	Valid	K test	K test	K test	K test	K test
1454	/opt/ImageBase/AWS_sync/cropped/aedes/albopictus/JHU-000254_01m.jpg	Valid						Valid							N	U2 test	U2 test	U2 test	N	Valid	train	train	train	train	train	Valid	K test	K test	K test	K test	K test
1455	/opt/ImageBase/AWS_sync/cropped/aedes/albopictus/JHU-000254_02m.jpg	Valid						Valid							N	U2 test	U2 test	U2 test	N	Valid	train	train	train	train	train	Valid	K test	K test	K test	K test	K test
1456	/opt/ImageBase/AWS_sync/cropped/aedes/albopictus/JHU-000214_02m.jpg	Valid						Valid							N	U2 test	U2 test	U2 test	N	Valid						Valid
1457	/opt/ImageBase/AWS_sync/cropped/aedes/albopictus/JHU-000214_03m.jpg	Valid						Valid							N	U2 test	U2 test	U2 test	N	Valid						Valid
1458	/opt/ImageBase/AWS_sync/cropped/aedes/albopictus/JHU-000214_01m.jpg	Valid						Valid							N	U2 test	U2 test	U2 test	N	Valid						Valid
1459	/opt/ImageBase/AWS_sync/cropped/aedes/albopictus/JHU-001076_04m.jpg	Valid						Valid							N	U2 test	U2 test	U2 test	N	Valid						Valid
1460	/opt/ImageBase/AWS_sync/cropped/aedes/albopictus/JHU-001076_01m.jpg	Valid						Valid							N	U2 test	U2 test	U2 test	N	Valid						Valid
1461	/opt/ImageBase/AWS_sync/cropped/aedes/albopictus/JHU-001076_05m.jpg	Valid						Valid							N	U2 test	U2 test	U2 test	N	Valid						Valid
1462	/opt/ImageBase/AWS_sync/cropped/aedes/albopictus/JHU-001076_02m.jpg	Valid						Valid							N	U2 test	U2 test	U2 test	N	Valid						Valid
1463	/opt/ImageBase/AWS_sync/cropped/aedes/albopictus/JHU-001076_03m.jpg	Valid						Valid							N	U2 test	U2 test	U2 test	N	Valid						Valid
1464	/opt/ImageBase/AWS_sync/cropped/aedes/albopictus/JHU-001430_03m.jpg	Valid						Valid	train	train	train	train	train		N	U2 test	U2 test	U2 test	N	Valid						Valid
1465	/opt/ImageBase/AWS_sync/cropped/aedes/albopictus/JHU-001430_04m.jpg	Valid						Valid	train	train	train	train	train		N	U2 test	U2 test	U2 test	N	Valid						Valid
1466	/opt/ImageBase/AWS_sync/cropped/aedes/albopictus/JHU-001430_01m.jpg	Valid						Valid	train	train	train	train	train		N	U2 test	U2 test	U2 test	N	Valid						Valid
1467	/opt/ImageBase/AWS_sync/cropped/aedes/albopictus/JHU-001430_02m.jpg	Valid						Valid	train	train	train	train	train		N	U2 test	U2 test	U2 test	N	Valid						Valid
1468	/opt/ImageBase/AWS_sync/cropped/aedes/albopictus/JHU-000398_03m.jpg	Valid						Valid							N	U2 test	U2 test	U2 test	N	Valid						Valid	train	train	train	train	train
1469	/opt/ImageBase/AWS_sync/cropped/aedes/albopictus/JHU-000398_04m.jpg	Valid						Valid							N	U2 test	U2 test	U2 test	N	Valid						Valid	train	train	train	train	train
1470	/opt/ImageBase/AWS_sync/cropped/aedes/albopictus/JHU-000398_02m.jpg	Valid						Valid							N	U2 test	U2 test	U2 test	N	Valid						Valid	train	train	train	train	train
1471	/opt/ImageBase/AWS_sync/cropped/aedes/albopictus/JHU-000398_01m.jpg	Valid						Valid							N	U2 test	U2 test	U2 test	N	Valid						Valid	train	train	train	train	train
1472	/opt/ImageBase/AWS_sync/cropped/aedes/albopictus/JHU-001046_03m.jpg	Valid						Valid							N	U2 test	U2 test	U2 test	N	Valid	K test	K test	K test	K test	K test	Valid	train	train	train	train	train
1473	/opt/ImageBase/AWS_sync/cropped/aedes/albopictus/JHU-001046_01m.jpg	Valid						Valid							N	U2 test	U2 test	U2 test	N	Valid	K test	K test	K test	K test	K test	Valid	train	train	train	train	train
1474	/opt/ImageBase/AWS_sync/cropped/aedes/albopictus/JHU-001046_04m.jpg	Valid						Valid							N	U2 test	U2 test	U2 test	N	Valid	K test	K test	K test	K test	K test	Valid	train	train	train	train	train
1475	/opt/ImageBase/AWS_sync/cropped/aedes/albopictus/JHU-001046_02m.jpg	Valid						Valid							N	U2 test	U2 test	U2 test	N	Valid	K test	K test	K test	K test	K test	Valid	train	train	train	train	train
1476	/opt/ImageBase/AWS_sync/cropped/aedes/albopictus/JHU-001541_02m.jpg	Valid						Valid	train	train	train	train	train		N	U2 test	U2 test	U2 test	N	Valid						Valid
1477	/opt/ImageBase/AWS_sync/cropped/aedes/albopictus/JHU-001541_03m.jpg	Valid						Valid	train	train	train	train	train		N	U2 test	U2 test	U2 test	N	Valid						Valid
1478	/opt/ImageBase/AWS_sync/cropped/aedes/albopictus/JHU-001541_04m.jpg	Valid						Valid	train	train	train	train	train		N	U2 test	U2 test	U2 test	N	Valid						Valid
1479	/opt/ImageBase/AWS_sync/cropped/aedes/albopictus/JHU-001541_01m.jpg	Valid						Valid	train	train	train	train	train		N	U2 test	U2 test	U2 test	N	Valid						Valid
1480	/opt/ImageBase/AWS_sync/cropped/aedes/albopictus/JHU-001541_05m.jpg	Valid						Valid	train	train	train	train	train		N	U2 test	U2 test	U2 test	N	Valid						Valid
1481	/opt/ImageBase/AWS_sync/cropped/aedes/albopictus/JHU-000305_04m.jpg	Valid						Valid							N	U2 test	U2 test	U2 test	N	Valid						Valid
1482	/opt/ImageBase/AWS_sync/cropped/aedes/albopictus/JHU-000305_01m.jpg	Valid						Valid							N	U2 test	U2 test	U2 test	N	Valid						Valid
1483	/opt/ImageBase/AWS_sync/cropped/aedes/albopictus/JHU-000305_03m.jpg	Valid						Valid							N	U2 test	U2 test	U2 test	N	Valid						Valid
1484	/opt/ImageBase/AWS_sync/cropped/aedes/albopictus/JHU-000305_02m.jpg	Valid						Valid							N	U2 test	U2 test	U2 test	N	Valid						Valid
1485	/opt/ImageBase/AWS_sync/cropped/aedes/albopictus/JHU-001242_01m.jpg	Valid						Valid							N	U2 test	U2 test	U2 test	N	Valid						Valid	K test	K test	K test	K test	K test
1486	/opt/ImageBase/AWS_sync/cropped/aedes/albopictus/JHU-001242_03m.jpg	Valid						Valid							N	U2 test	U2 test	U2 test	N	Valid						Valid	K test	K test	K test	K test	K test
1487	/opt/ImageBase/AWS_sync/cropped/aedes/albopictus/JHU-001242_02m.jpg	Valid						Valid							N	U2 test	U2 test	U2 test	N	Valid						Valid	K test	K test	K test	K test	K test
1488	/opt/ImageBase/AWS_sync/cropped/aedes/albopictus/JHU-001214_01m.jpg	Valid						Valid							N	U2 test	U2 test	U2 test	N	Valid						Valid
1489	/opt/ImageBase/AWS_sync/cropped/aedes/albopictus/JHU-001214_04m.jpg	Valid						Valid							N	U2 test	U2 test	U2 test	N	Valid						Valid
1490	/opt/ImageBase/AWS_sync/cropped/aedes/albopictus/JHU-001214_05m.jpg	Valid						Valid							N	U2 test	U2 test	U2 test	N	Valid						Valid
1491	/opt/ImageBase/AWS_sync/cropped/aedes/albopictus/JHU-001214_02m.jpg	Valid						Valid							N	U2 test	U2 test	U2 test	N	Valid						Valid
1492	/opt/ImageBase/AWS_sync/cropped/aedes/albopictus/JHU-001214_03m.jpg	Valid						Valid							N	U2 test	U2 test	U2 test	N	Valid						Valid
1493	/opt/ImageBase/AWS_sync/cropped/aedes/albopictus/JHU-000278_03m.jpg	Valid						Valid	train	train	train	train	train		N	U2 test	U2 test	U2 test	N	Valid						Valid
1494	/opt/ImageBase/AWS_sync/cropped/aedes/albopictus/JHU-000278_04m.jpg	Valid						Valid	train	train	train	train	train		N	U2 test	U2 test	U2 test	N	Valid						Valid
1495	/opt/ImageBase/AWS_sync/cropped/aedes/albopictus/JHU-000278_05m.jpg	Valid						Valid	train	train	train	train	train		N	U2 test	U2 test	U2 test	N	Valid						Valid
1496	/opt/ImageBase/AWS_sync/cropped/aedes/albopictus/JHU-000278_02m.jpg	Valid						Valid	train	train	train	train	train		N	U2 test	U2 test	U2 test	N	Valid						Valid
1497	/opt/ImageBase/AWS_sync/cropped/aedes/albopictus/JHU-000278_06m.jpg	Valid						Valid	train	train	train	train	train		N	U2 test	U2 test	U2 test	N	Valid						Valid
1498	/opt/ImageBase/AWS_sync/cropped/aedes/albopictus/JHU-000278_01m.jpg	Valid						Valid	train	train	train	train	train		N	U2 test	U2 test	U2 test	N	Valid						Valid
1499	/opt/ImageBase/AWS_sync/cropped/aedes/albopictus/JHU-001414_04m.jpg	Valid						Valid							N	U2 test	U2 test	U2 test	N	Valid	train	train	train	train	train	Valid	train	train	train	train	train
1500	/opt/ImageBase/AWS_sync/cropped/aedes/albopictus/JHU-001414_06m.jpg	Valid						Valid							N	U2 test	U2 test	U2 test	N	Valid	train	train	train	train	train	Valid	train	train	train	train	train
1501	/opt/ImageBase/AWS_sync/cropped/aedes/albopictus/JHU-001414_05m.jpg	Valid						Valid							N	U2 test	U2 test	U2 test	N	Valid	train	train	train	train	train	Valid	train	train	train	train	train
1502	/opt/ImageBase/AWS_sync/cropped/aedes/albopictus/JHU-001414_01m.jpg	Valid						Valid							N	U2 test	U2 test	U2 test	N	Valid	train	train	train	train	train	Valid	train	train	train	train	train
1503	/opt/ImageBase/AWS_sync/cropped/aedes/albopictus/JHU-001414_03m.jpg	Valid						Valid							N	U2 test	U2 test	U2 test	N	Valid	train	train	train	train	train	Valid	train	train	train	train	train
1504	/opt/ImageBase/AWS_sync/cropped/aedes/albopictus/JHU-001414_02m.jpg	Valid						Valid							N	U2 test	U2 test	U2 test	N	Valid	train	train	train	train	train	Valid	train	train	train	train	train
1505	/opt/ImageBase/AWS_sync/cropped/aedes/albopictus/JHU-000506_02m.jpg	Valid						Valid							N	U2 test	U2 test	U2 test	N	Valid						Valid
1506	/opt/ImageBase/AWS_sync/cropped/aedes/albopictus/JHU-000506_01m.jpg	Valid						Valid							N	U2 test	U2 test	U2 test	N	Valid						Valid
1507	/opt/ImageBase/AWS_sync/cropped/aedes/albopictus/JHU-000506_05m.jpg	Valid						Valid							N	U2 test	U2 test	U2 test	N	Valid						Valid
1508	/opt/ImageBase/AWS_sync/cropped/aedes/albopictus/JHU-000506_03m.jpg	Valid						Valid							N	U2 test	U2 test	U2 test	N	Valid						Valid
1509	/opt/ImageBase/AWS_sync/cropped/aedes/albopictus/JHU-000506_04m.jpg	Valid						Valid							N	U2 test	U2 test	U2 test	N	Valid						Valid
1510	/opt/ImageBase/AWS_sync/cropped/aedes/albopictus/JHU-001397_05m.jpg	Test	train	train	train	train	train	Valid							N	U2 test	U2 test	U2 test	N	Valid						Valid
1511	/opt/ImageBase/AWS_sync/cropped/aedes/albopictus/JHU-001397_02m.jpg	Test	train	train	train	train	train	Valid							N	U2 test	U2 test	U2 test	N	Valid						Test
1512	/opt/ImageBase/AWS_sync/cropped/aedes/albopictus/JHU-001397_03m.jpg	Test	train	train	train	train	train	Valid							N	U2 test	U2 test	U2 test	N	Valid						Test
1513	/opt/ImageBase/AWS_sync/cropped/aedes/albopictus/JHU-001397_01m.jpg	Test	train	train	train	train	train	Valid							N	U2 test	U2 test	U2 test	N	Valid						Test
1514	/opt/ImageBase/AWS_sync/cropped/aedes/albopictus/JHU-001397_04m.jpg	Test	train	train	train	train	train	Valid							N	U2 test	U2 test	U2 test	N	Test						Test
1515	/opt/ImageBase/AWS_sync/cropped/aedes/albopictus/JHU-000396_02m.jpg	Test	K test	K test	K test	K test	K test	Valid							N	U2 test	U2 test	U2 test	N	Test						Test
1516	/opt/ImageBase/AWS_sync/cropped/aedes/albopictus/JHU-000396_05m.jpg	Test	K test	K test	K test	K test	K test	Valid							N	U2 test	U2 test	U2 test	N	Test						Test
1517	/opt/ImageBase/AWS_sync/cropped/aedes/albopictus/JHU-000396_03m.jpg	Test	K test	K test	K test	K test	K test	Valid							N	U2 test	U2 test	U2 test	N	Test						Test
1518	/opt/ImageBase/AWS_sync/cropped/aedes/albopictus/JHU-000396_04m.jpg	Test	K test	K test	K test	K test	K test	Valid							N	U2 test	U2 test	U2 test	N	Test						Test
1519	/opt/ImageBase/AWS_sync/cropped/aedes/albopictus/JHU-000396_01m.jpg	Test	K test	K test	K test	K test	K test	Valid							N	U2 test	U2 test	U2 test	N	Test						Test
1520	/opt/ImageBase/AWS_sync/cropped/aedes/albopictus/JHU-001449_01m.jpg	Test	K test	K test	K test	K test	K test	Valid							N	U2 test	U2 test	U2 test	N	Test						Test	train	train	train	train	train
1521	/opt/ImageBase/AWS_sync/cropped/aedes/albopictus/JHU-001449_04m.jpg	Test	K test	K test	K test	K test	K test	Valid							N	U2 test	U2 test	U2 test	N	Test						Test	train	train	train	train	train
1522	/opt/ImageBase/AWS_sync/cropped/aedes/albopictus/JHU-001449_03m.jpg	Test	K test	K test	K test	K test	K test	Valid							N	U2 test	U2 test	U2 test	N	Test						Test	train	train	train	train	train
1523	/opt/ImageBase/AWS_sync/cropped/aedes/albopictus/JHU-001449_05m.jpg	Test	K test	K test	K test	K test	K test	Test							N	U2 test	U2 test	U2 test	N	Test						Test	train	train	train	train	train
1524	/opt/ImageBase/AWS_sync/cropped/aedes/albopictus/JHU-001449_02m.jpg	Test	K test	K test	K test	K test	K test	Test							N	U2 test	U2 test	U2 test	N	Test						Test	train	train	train	train	train
1525	/opt/ImageBase/AWS_sync/cropped/aedes/albopictus/JHU-001473_03m.jpg	Test	train	train	train	train	train	Test							N	U2 test	U2 test	U2 test	N	Test						Test
1526	/opt/ImageBase/AWS_sync/cropped/aedes/albopictus/JHU-001473_06m.jpg	Test	train	train	train	train	train	Test							N	U2 test	U2 test	U2 test	N	Test						Test
1527	/opt/ImageBase/AWS_sync/cropped/aedes/albopictus/JHU-001473_04m.jpg	Test	train	train	train	train	train	Test							N	U2 test	U2 test	U2 test	N	Test						Test
1528	/opt/ImageBase/AWS_sync/cropped/aedes/albopictus/JHU-001473_01m.jpg	Test	train	train	train	train	train	Test							N	U2 test	U2 test	U2 test	N	Test						Test
1529	/opt/ImageBase/AWS_sync/cropped/aedes/albopictus/JHU-001473_05m.jpg	Test	train	train	train	train	train	Test							N	U2 test	U2 test	U2 test	N	Test						Test
1530	/opt/ImageBase/AWS_sync/cropped/aedes/albopictus/JHU-001473_02m.jpg	Test	train	train	train	train	train	Test							N	U2 test	U2 test	U2 test	N	Test						Test
1531	/opt/ImageBase/AWS_sync/cropped/aedes/albopictus/JHU-000338_02m.jpg	Test	K test	K test	K test	K test	K test	Test							N	U2 test	U2 test	U2 test	N	Test						Test
1532	/opt/ImageBase/AWS_sync/cropped/aedes/albopictus/JHU-000338_04m.jpg	Test	K test	K test	K test	K test	K test	Test							N	U2 test	U2 test	U2 test	N	Test						Test
1533	/opt/ImageBase/AWS_sync/cropped/aedes/albopictus/JHU-000338_01m.jpg	Test	K test	K test	K test	K test	K test	Test							N	U2 test	U2 test	U2 test	N	Test						Test
1534	/opt/ImageBase/AWS_sync/cropped/aedes/albopictus/JHU-000338_03m.jpg	Test	K test	K test	K test	K test	K test	Test							N	U2 test	U2 test	U2 test	N	Test						Test
1535	/opt/ImageBase/AWS_sync/cropped/aedes/albopictus/JHU-001424_01m.jpg	Test	train	train	train	train	train	Test							N	U2 test	U2 test	U2 test	N	Test	train	train	train	train	train	Test
1536	/opt/ImageBase/AWS_sync/cropped/aedes/albopictus/JHU-001424_05m.jpg	Test	train	train	train	train	train	Test							N	U2 test	U2 test	U2 test	N	Test	train	train	train	train	train	Test
1537	/opt/ImageBase/AWS_sync/cropped/aedes/albopictus/JHU-001424_03m.jpg	Test	train	train	train	train	train	Test							N	U2 test	U2 test	U2 test	N	Test	train	train	train	train	train	Test
1538	/opt/ImageBase/AWS_sync/cropped/aedes/albopictus/JHU-001424_02m.jpg	Test	train	train	train	train	train	Test							N	U2 test	U2 test	U2 test	N	Test	train	train	train	train	train	Test
1539	/opt/ImageBase/AWS_sync/cropped/aedes/albopictus/JHU-001424_04m.jpg	Test	train	train	train	train	train	Test							N	U2 test	U2 test	U2 test	N	Test	train	train	train	train	train	Test
1540	/opt/ImageBase/AWS_sync/cropped/aedes/albopictus/JHU-001178_03m.jpg	Test	train	train	train	train	train	Test							N	U2 test	U2 test	U2 test	N	Test	train	train	train	train	train	Test	train	train	train	train	train
1541	/opt/ImageBase/AWS_sync/cropped/aedes/albopictus/JHU-001178_02m.jpg	Test	train	train	train	train	train	Test							N	U2 test	U2 test	U2 test	N	Test	train	train	train	train	train	Test	train	train	train	train	train
1542	/opt/ImageBase/AWS_sync/cropped/aedes/albopictus/JHU-001178_01m.jpg	Test	train	train	train	train	train	Test							N	U2 test	U2 test	U2 test	N	Test	train	train	train	train	train	Test	train	train	train	train	train
1543	/opt/ImageBase/AWS_sync/cropped/aedes/albopictus/JHU-000277_05m.jpg	Test	train	train	train	train	train	Test							N	U2 test	U2 test	U2 test	N	Test						Test
1544	/opt/ImageBase/AWS_sync/cropped/aedes/albopictus/JHU-000277_02m.jpg	Test	train	train	train	train	train	Test							N	U2 test	U2 test	U2 test	N	Test						Test
1545	/opt/ImageBase/AWS_sync/cropped/aedes/albopictus/JHU-000277_01m.jpg	Test	train	train	train	train	train	Test							N	U2 test	U2 test	U2 test	N	Test						Test
1546	/opt/ImageBase/AWS_sync/cropped/aedes/albopictus/JHU-000277_03m.jpg	Test	train	train	train	train	train	Test							N	U2 test	U2 test	U2 test	N	Test						Test
1547	/opt/ImageBase/AWS_sync/cropped/aedes/albopictus/JHU-000277_04m.jpg	Test	train	train	train	train	train	Test							N	U2 test	U2 test	U2 test	N	Test						Test
1548	/opt/ImageBase/AWS_sync/cropped/aedes/albopictus/JHU-001146_05m.jpg	Test	K test	train	train	train	train	Test							N	U2 test	U2 test	U2 test	N	Test						Test
1549	/opt/ImageBase/AWS_sync/cropped/aedes/albopictus/JHU-001146_04m.jpg	Test	K test	train	train	train	train	Test							N	U2 test	U2 test	U2 test	N	Test						Test
1550	/opt/ImageBase/AWS_sync/cropped/aedes/albopictus/JHU-001146_02m.jpg	Test	K test	train	train	train	train	Test							N	U2 test	U2 test	U2 test	N	Test						Test
1551	/opt/ImageBase/AWS_sync/cropped/aedes/albopictus/JHU-001146_01m.jpg	Test	K test	train	train	train	train	Test							N	U2 test	U2 test	U2 test	N	Test						Test
1552	/opt/ImageBase/AWS_sync/cropped/aedes/albopictus/JHU-001146_03m.jpg	Test	K test	train	train	train	train	Test							N	U2 test	U2 test	U2 test	N	Test						Test
1553	/opt/ImageBase/AWS_sync/cropped/aedes/albopictus/JHU-000236_04m.jpg	Test	train	train	train	train	train	Test							N	U2 test	U2 test	U2 test	N	Test						Test	train	train	train	train	train
1554	/opt/ImageBase/AWS_sync/cropped/aedes/albopictus/JHU-000236_03m.jpg	Test	train	train	train	train	train	Test							N	U2 test	U2 test	U2 test	N	Test						Test	train	train	train	train	train
1555	/opt/ImageBase/AWS_sync/cropped/aedes/albopictus/JHU-000236_01m.jpg	Test	train	train	train	train	train	Test							N	U2 test	U2 test	U2 test	N	Test						Test	train	train	train	train	train
1556	/opt/ImageBase/AWS_sync/cropped/aedes/albopictus/JHU-000236_05m.jpg	Test	train	train	train	train	train	Test							N	U2 test	U2 test	U2 test	N	Test						Test	train	train	train	train	train
1557	/opt/ImageBase/AWS_sync/cropped/aedes/albopictus/JHU-000236_02m.jpg	Test	train	train	train	train	train	Test							N	U2 test	U2 test	U2 test	N	Test						Test	train	train	train	train	train
1558	/opt/ImageBase/AWS_sync/cropped/aedes/albopictus/JHU-001456_01m.jpg	Test	train	train	train	train	train	Test							N	U2 test	U2 test	U2 test	N	Test	train	train	train	K test	train	Test
1559	/opt/ImageBase/AWS_sync/cropped/aedes/albopictus/JHU-001456_05m.jpg	Test	train	train	train	train	train	Test							N	U2 test	U2 test	U2 test	N	Test	train	train	train	K test	train	Test
1560	/opt/ImageBase/AWS_sync/cropped/aedes/albopictus/JHU-001456_03m.jpg	Test	train	train	train	train	train	Test							N	U2 test	U2 test	U2 test	N	Test	train	train	train	K test	train	Test
1561	/opt/ImageBase/AWS_sync/cropped/aedes/albopictus/JHU-001456_04m.jpg	Test	train	train	train	train	train	Test							N	U2 test	U2 test	U2 test	N	Test	train	train	train	K test	train	Test
1562	/opt/ImageBase/AWS_sync/cropped/aedes/albopictus/JHU-001456_02m.jpg	Test	train	train	train	train	train	Test							N	U2 test	U2 test	U2 test	N	Test	train	train	train	K test	train	Test
1563	/opt/ImageBase/AWS_sync/cropped/aedes/albopictus/JHU-001560_02m.jpg	Test	K test	K test	K test	K test	K test	Test							N	U2 test	U2 test	U2 test	N	Test						Test
1564	/opt/ImageBase/AWS_sync/cropped/aedes/albopictus/JHU-001560_01m.jpg	Test	K test	K test	K test	K test	K test	Test							N	U2 test	U2 test	U2 test	N	Test						Test
1565	/opt/ImageBase/AWS_sync/cropped/aedes/albopictus/JHU-001560_05m.jpg	Test	K test	K test	K test	K test	K test	Test							N	U2 test	U2 test	U2 test	N	Test						Test
1566	/opt/ImageBase/AWS_sync/cropped/aedes/albopictus/JHU-001560_03m.jpg	Test	K test	K test	K test	K test	K test	Test							N	U2 test	U2 test	U2 test	N	Test						Test
1567	/opt/ImageBase/AWS_sync/cropped/aedes/albopictus/JHU-001560_04m.jpg	Test	K test	K test	K test	K test	K test	Test							N	U2 test	U2 test	U2 test	N	Test						Test
1568	/opt/ImageBase/AWS_sync/cropped/aedes/albopictus/JHU-001184_04m.jpg	Test	train	train	train	train	train	Test							N	train	train	train	N	Test						Test
1569	/opt/ImageBase/AWS_sync/cropped/aedes/albopictus/JHU-001184_03m.jpg	Test	train	train	train	train	train	Test							N	train	train	train	N	Test						Test
1570	/opt/ImageBase/AWS_sync/cropped/aedes/albopictus/JHU-001184_06m.jpg	Test	train	train	train	train	train	Test							N	train	train	train	N	Test						Test
1571	/opt/ImageBase/AWS_sync/cropped/aedes/albopictus/JHU-001184_02m.jpg	Test	train	train	train	train	train	Test							N	train	train	train	N	Test						Test
1572	/opt/ImageBase/AWS_sync/cropped/aedes/albopictus/JHU-001184_01m.jpg	Test	train	train	train	train	train	Test							N	train	train	train	N	Test						Test
1573	/opt/ImageBase/AWS_sync/cropped/aedes/albopictus/JHU-001184_05m.jpg	Test	train	train	train	train	train	Test							N	train	train	train	N	Test						Test
1574	/opt/ImageBase/AWS_sync/cropped/aedes/albopictus/JHU-001029_03m.jpg	Test	train	train	train	train	train	Test							N	train	train	train	N	Test						Test	train	train	train	train	train
1575	/opt/ImageBase/AWS_sync/cropped/aedes/albopictus/JHU-001029_01m.jpg	Test	train	train	train	train	train	Test							N	train	train	train	N	Test						Test	train	train	train	train	train
1576	/opt/ImageBase/AWS_sync/cropped/aedes/albopictus/JHU-001029_02m.jpg	Test	train	train	train	train	train	Test							N	train	train	train	N	Test						Test	train	train	train	train	train
1577	/opt/ImageBase/AWS_sync/cropped/aedes/albopictus/JHU-001029_05m.jpg	Test	train	train	train	train	train	Test							N	train	train	train	N	Test						Test	train	train	train	train	train
1578	/opt/ImageBase/AWS_sync/cropped/aedes/albopictus/JHU-001029_04m.jpg	Test	train	train	train	train	train	Test							N	train	train	train	N	Test						Test	train	train	train	train	train
1579	/opt/ImageBase/AWS_sync/cropped/aedes/albopictus/JHU-000324_03m.jpg	Test	train	train	train	train	train	Test							N	U2 test	U2 test	U2 test	N	Test						Test
1580	/opt/ImageBase/AWS_sync/cropped/aedes/albopictus/JHU-000324_01m.jpg	Test	train	train	train	train	train	Test							N	U2 test	U2 test	U2 test	N	Test						Test
1581	/opt/ImageBase/AWS_sync/cropped/aedes/albopictus/JHU-000324_05m.jpg	Test	train	train	train	train	train	Test							N	U2 test	U2 test	U2 test	N	Test						Test
1582	/opt/ImageBase/AWS_sync/cropped/aedes/albopictus/JHU-000324_04m.jpg	Test	train	train	train	train	train	Test							N	U2 test	U2 test	U2 test	N	Test						Test
1583	/opt/ImageBase/AWS_sync/cropped/aedes/albopictus/JHU-000324_02m.jpg	Test	train	train	train	train	train	Test							N	U2 test	U2 test	U2 test	N	Test						Test
1584	/opt/ImageBase/AWS_sync/cropped/aedes/albopictus/JHU-001308_04m.jpg	Test	train	train	train	train	train	Test							N	U2 test	U2 test	U2 test	N	Test						Test
1585	/opt/ImageBase/AWS_sync/cropped/aedes/albopictus/JHU-001308_03m.jpg	Test	train	train	train	train	train	Test							N	U2 test	U2 test	U2 test	N	Test						Test
1586	/opt/ImageBase/AWS_sync/cropped/aedes/albopictus/JHU-001308_05m.jpg	Test	train	train	train	train	train	Test							N	U2 test	U2 test	U2 test	N	Test						Test
1587	/opt/ImageBase/AWS_sync/cropped/aedes/albopictus/JHU-001308_01m.jpg	Test	train	train	train	train	train	Test							N	U2 test	U2 test	U2 test	N	Test						Test
1588	/opt/ImageBase/AWS_sync/cropped/aedes/albopictus/JHU-001308_06m.jpg	Test	train	train	train	train	train	Test							N	U2 test	U2 test	U2 test	N	Test						Test
1589	/opt/ImageBase/AWS_sync/cropped/aedes/albopictus/JHU-001308_02m.jpg	Test	train	train	train	train	train	Test							N	U2 test	U2 test	U2 test	N	Test						Test
1590	/opt/ImageBase/AWS_sync/cropped/aedes/albopictus/JHU-001552_06m.jpg	Test	train	train	train	train	train	Test							N	U2 test	U2 test	U2 test	N	Test						Test
1591	/opt/ImageBase/AWS_sync/cropped/aedes/albopictus/JHU-001552_01m.jpg	Test	train	train	train	train	train	Test							N	U2 test	U2 test	U2 test	N	Test						Test
1592	/opt/ImageBase/AWS_sync/cropped/aedes/albopictus/JHU-001552_04m.jpg	Test	train	train	train	train	train	Test							N	U2 test	U2 test	U2 test	N	Test						Test
1593	/opt/ImageBase/AWS_sync/cropped/aedes/albopictus/JHU-001552_03m.jpg	Test	train	train	train	train	train	Test							N	U2 test	U2 test	U2 test	N	Test						Test
1594	/opt/ImageBase/AWS_sync/cropped/aedes/albopictus/JHU-001552_05m.jpg	Test	train	train	train	train	train	Test							N	U2 test	U2 test	U2 test	N	Test						Test
1595	/opt/ImageBase/AWS_sync/cropped/aedes/albopictus/JHU-001552_02m.jpg	Test	train	train	train	train	train	Test							N	U2 test	U2 test	U2 test	N	Test						Test
1596	/opt/ImageBase/AWS_sync/cropped/aedes/albopictus/JHU-000394_03m.jpg	Test	K test	K test	K test	K test	K test	Test							N	train	train	train	N	Test						Test
1597	/opt/ImageBase/AWS_sync/cropped/aedes/albopictus/JHU-000394_05m.jpg	Test	K test	K test	K test	K test	K test	Test							N	train	train	train	N	Test						Test
1598	/opt/ImageBase/AWS_sync/cropped/aedes/albopictus/JHU-000394_01m.jpg	Test	K test	K test	K test	K test	K test	Test							N	train	train	train	N	Test						Test
1599	/opt/ImageBase/AWS_sync/cropped/aedes/albopictus/JHU-000394_04m.jpg	Test	K test	K test	K test	K test	K test	Test							N	train	train	train	N	Test						Test
1600	/opt/ImageBase/AWS_sync/cropped/aedes/albopictus/JHU-000394_02m.jpg	Test	K test	K test	K test	K test	K test	Test							N	train	train	train	N	Test						Test
1601	/opt/ImageBase/AWS_sync/cropped/aedes/albopictus/JHU-001154_03m.jpg	Test	train	train	train	train	train	Test	train	train	train	train	train		N	U2 test	U2 test	U2 test	N	Test						Test
1602	/opt/ImageBase/AWS_sync/cropped/aedes/albopictus/JHU-001154_01m.jpg	Test	train	train	train	train	train	Test	train	train	train	train	train		N	U2 test	U2 test	U2 test	N	Test						Test
1603	/opt/ImageBase/AWS_sync/cropped/aedes/albopictus/JHU-001154_02m.jpg	Test	train	train	train	train	train	Test	train	train	train	train	train		N	U2 test	U2 test	U2 test	N	Test						Test
1604	/opt/ImageBase/AWS_sync/cropped/aedes/albopictus/JHU-001436_04m.jpg	Test	K test	K test	K test	K test	K test	Test							N	U2 test	U2 test	U2 test	N	Test						Test
1605	/opt/ImageBase/AWS_sync/cropped/aedes/albopictus/JHU-001436_02m.jpg	Test	K test	K test	K test	K test	K test	Test							N	U2 test	U2 test	U2 test	N	Test						Test
1606	/opt/ImageBase/AWS_sync/cropped/aedes/albopictus/JHU-001436_05m.jpg	Test	K test	K test	K test	K test	K test	Test							N	U2 test	U2 test	U2 test	N	Test						Test
1607	/opt/ImageBase/AWS_sync/cropped/aedes/albopictus/JHU-001436_03m.jpg	Test	K test	K test	K test	K test	K test	Test							N	U2 test	U2 test	U2 test	N	Test						Test
1608	/opt/ImageBase/AWS_sync/cropped/aedes/albopictus/JHU-001436_01m.jpg	Test	K test	K test	K test	K test	K test	Test							N	U2 test	U2 test	U2 test	N	Test						Test
1609	/opt/ImageBase/AWS_sync/cropped/aedes/albopictus/JHU-000400_03m.jpg	Test	train	train	train	train	train	Test							N	U2 test	U2 test	U2 test	N	Test						Test
1610	/opt/ImageBase/AWS_sync/cropped/aedes/albopictus/JHU-000400_04m.jpg	Test	train	train	train	train	train	Test							N	U2 test	U2 test	U2 test	N	Test						Test
1611	/opt/ImageBase/AWS_sync/cropped/aedes/albopictus/JHU-000400_01m.jpg	Test	train	train	train	train	train	Test							N	U2 test	U2 test	U2 test	N	Test						Test
1612	/opt/ImageBase/AWS_sync/cropped/aedes/albopictus/JHU-000400_02m.jpg	Test	train	train	train	train	train	Test							N	U2 test	U2 test	U2 test	N	Test						Test
1613	/opt/ImageBase/AWS_sync/cropped/aedes/atlanticus/JHU-002483_01m.jpg	Train						Train						Train	U1 test	U1 test	U1 test	U1 test	U1 test	Train						Train
1614	/opt/ImageBase/AWS_sync/cropped/aedes/atlanticus/JHU-002483_05m.jpg	Train						Train						Train	U1 test	U1 test	U1 test	U1 test	U1 test	Train						Train
1615	/opt/ImageBase/AWS_sync/cropped/aedes/atlanticus/JHU-002483_04m.jpg	Train						Train						Train	U1 test	U1 test	U1 test	U1 test	U1 test	Train						Train
1616	/opt/ImageBase/AWS_sync/cropped/aedes/atlanticus/JHU-002483_02m.jpg	Train						Train						Train	U1 test	U1 test	U1 test	U1 test	U1 test	Train						Train
1617	/opt/ImageBase/AWS_sync/cropped/aedes/atlanticus/JHU-002483_06m.jpg	Train						Train						Train	U1 test	U1 test	U1 test	U1 test	U1 test	Train						Train
1618	/opt/ImageBase/AWS_sync/cropped/aedes/atlanticus/JHU-002483_03m.jpg	Train						Train						Train	U1 test	U1 test	U1 test	U1 test	U1 test	Train						Train
1619	/opt/ImageBase/AWS_sync/cropped/aedes/atlanticus/JHU-002465_03m.jpg	Train						Train	train	train	train	train	train	Train						Train						Train
1620	/opt/ImageBase/AWS_sync/cropped/aedes/atlanticus/JHU-002465_04m.jpg	Train						Train	train	train	train	train	train	Train						Train						Train
1621	/opt/ImageBase/AWS_sync/cropped/aedes/atlanticus/JHU-002465_05m.jpg	Train						Train	train	train	train	train	train	Train						Train						Train
1622	/opt/ImageBase/AWS_sync/cropped/aedes/atlanticus/JHU-002465_01m.jpg	Train						Train	train	train	train	train	train	Train						Train						Train
1623	/opt/ImageBase/AWS_sync/cropped/aedes/atlanticus/JHU-002465_02m.jpg	Train						Train	train	train	train	train	train	Train						Train						Train
1624	/opt/ImageBase/AWS_sync/cropped/aedes/atlanticus/JHU-000519_03m.jpg	Train						Train						Train						Train	train	train	train	train	train	Train
1625	/opt/ImageBase/AWS_sync/cropped/aedes/atlanticus/JHU-000519_01m.jpg	Train						Train						Train						Train	train	train	train	train	train	Train
1626	/opt/ImageBase/AWS_sync/cropped/aedes/atlanticus/JHU-000519_05m.jpg	Train						Train						Train						Train	train	train	train	train	train	Train
1627	/opt/ImageBase/AWS_sync/cropped/aedes/atlanticus/JHU-000519_04m.jpg	Train						Train						Train						Train	train	train	train	train	train	Train
1628	/opt/ImageBase/AWS_sync/cropped/aedes/atlanticus/JHU-000519_02m.jpg	Train						Train						Train						Train	train	train	train	train	train	Train
1629	/opt/ImageBase/AWS_sync/cropped/aedes/atlanticus/JHU-002466_04m.jpg	Train						Train						Train						Train						Train
1630	/opt/ImageBase/AWS_sync/cropped/aedes/atlanticus/JHU-002466_05m.jpg	Train						Train						Train						Train						Train
1631	/opt/ImageBase/AWS_sync/cropped/aedes/atlanticus/JHU-002466_06m.jpg	Train						Train						Train						Train						Train
1632	/opt/ImageBase/AWS_sync/cropped/aedes/atlanticus/JHU-002466_01m.jpg	Train						Train						Train						Train						Train
1633	/opt/ImageBase/AWS_sync/cropped/aedes/atlanticus/JHU-002466_03m.jpg	Train						Train						Train						Train						Train
1634	/opt/ImageBase/AWS_sync/cropped/aedes/atlanticus/JHU-002466_02m.jpg	Train						Train						Train						Train						Train
1635	/opt/ImageBase/AWS_sync/cropped/aedes/atlanticus/JHU-002484_06m.jpg	Train						Train						Train	train	train	train	train	train	Train						Train
1636	/opt/ImageBase/AWS_sync/cropped/aedes/atlanticus/JHU-002484_03m.jpg	Train						Train						Train	train	train	train	train	train	Train						Train
1637	/opt/ImageBase/AWS_sync/cropped/aedes/atlanticus/JHU-002484_01m.jpg	Train						Train						Train	train	train	train	train	train	Train						Train
1638	/opt/ImageBase/AWS_sync/cropped/aedes/atlanticus/JHU-002484_05m.jpg	Train						Train						Train	train	train	train	train	train	Train						Train
1639	/opt/ImageBase/AWS_sync/cropped/aedes/atlanticus/JHU-002484_04m.jpg	Train						Train						Train	train	train	train	train	train	Train						Train
1640	/opt/ImageBase/AWS_sync/cropped/aedes/atlanticus/JHU-002484_02m.jpg	Train						Train						Train	train	train	train	train	train	Train						Train
1641	/opt/ImageBase/AWS_sync/cropped/aedes/atlanticus/JHU-002485_02m.jpg	Train						Train	U1 test	U1 test	U1 test	U1 test	U1 test	Train						Train	train	train	train	train	train	Train
1642	/opt/ImageBase/AWS_sync/cropped/aedes/atlanticus/JHU-002485_01m.jpg	Train						Train	U1 test	U1 test	U1 test	U1 test	U1 test	Train						Train	train	train	train	train	train	Train
1643	/opt/ImageBase/AWS_sync/cropped/aedes/atlanticus/JHU-002485_04m.jpg	Train						Train	U1 test	U1 test	U1 test	U1 test	U1 test	Train						Train	train	train	train	train	train	Train
1644	/opt/ImageBase/AWS_sync/cropped/aedes/atlanticus/JHU-002485_03m.jpg	Train						Train	U1 test	U1 test	U1 test	U1 test	U1 test	Train						Train	train	train	train	train	train	Train
1645	/opt/ImageBase/AWS_sync/cropped/aedes/atlanticus/JHU-002464_03m.jpg	Train						Train						Train						Train						Train	train	train	train	train	train
1646	/opt/ImageBase/AWS_sync/cropped/aedes/atlanticus/JHU-002464_04m.jpg	Train						Train						Train						Train						Train	train	train	train	train	train
1647	/opt/ImageBase/AWS_sync/cropped/aedes/atlanticus/JHU-002464_02m.jpg	Train						Train						Train						Train						Train	train	train	train	train	train
1648	/opt/ImageBase/AWS_sync/cropped/aedes/atlanticus/JHU-002464_01m.jpg	Train						Train						Train						Train						Train	train	train	train	train	train
1649	/opt/ImageBase/AWS_sync/cropped/aedes/atlanticus/JHU-002464_05m.jpg	Train						Train						Train						Train						Train	train	train	train	train	train
1650	/opt/ImageBase/AWS_sync/cropped/aedes/atlanticus/JHU-001492_04m.jpg	Train						Train						Train						Train						Train
1651	/opt/ImageBase/AWS_sync/cropped/aedes/atlanticus/JHU-001492_03m.jpg	Train						Train						Train						Train						Train
1652	/opt/ImageBase/AWS_sync/cropped/aedes/atlanticus/JHU-001492_05m.jpg	Train						Train						Train						Train						Train
1653	/opt/ImageBase/AWS_sync/cropped/aedes/atlanticus/JHU-001492_02m.jpg	Train						Train						Train						Train						Train
1654	/opt/ImageBase/AWS_sync/cropped/aedes/atlanticus/JHU-001492_01m.jpg	Train						Train						Train						Train						Train
1655	/opt/ImageBase/AWS_sync/cropped/aedes/atlanticus/JHU-000211_04m.jpg	Train						Train						Train						Train	U1 test	U1 test	U1 test	U1 test	U1 test	Train	train	U1 test	U1 test	train	train
1656	/opt/ImageBase/AWS_sync/cropped/aedes/atlanticus/JHU-000211_01m.jpg	Train						Train						Train						Train	U1 test	U1 test	U1 test	U1 test	U1 test	Train	train	U1 test	U1 test	train	train
1657	/opt/ImageBase/AWS_sync/cropped/aedes/atlanticus/JHU-000211_03m.jpg	Train						Train						Train						Train	U1 test	U1 test	U1 test	U1 test	U1 test	Train	train	U1 test	U1 test	train	train
1658	/opt/ImageBase/AWS_sync/cropped/aedes/atlanticus/JHU-000211_02m.jpg	Train						Train						Train						Train	U1 test	U1 test	U1 test	U1 test	U1 test	Train	train	U1 test	U1 test	train	train
1659	/opt/ImageBase/AWS_sync/cropped/aedes/atlanticus/JHU-001227_01m.jpg	Train						Train	U1 test	U1 test	U1 test	U1 test	U1 test	Train						Train						Train
1660	/opt/ImageBase/AWS_sync/cropped/aedes/atlanticus/JHU-001227_03m.jpg	Train						Train	U1 test	U1 test	U1 test	U1 test	U1 test	Train						Train						Train
1661	/opt/ImageBase/AWS_sync/cropped/aedes/atlanticus/JHU-001227_05m.jpg	Train						Train	U1 test	U1 test	U1 test	U1 test	U1 test	Train						Train						Train
1662	/opt/ImageBase/AWS_sync/cropped/aedes/atlanticus/JHU-001227_04m.jpg	Train						Train	U1 test	U1 test	U1 test	U1 test	U1 test	Train						Train						Train
1663	/opt/ImageBase/AWS_sync/cropped/aedes/atlanticus/JHU-001227_02m.jpg	Train						Train	U1 test	U1 test	U1 test	U1 test	U1 test	Train						Train						Train
1664	/opt/ImageBase/AWS_sync/cropped/aedes/atlanticus/JHU-000518_05m.jpg	Train						Train						Train	train	train	train	train	train	Train						Train
1665	/opt/ImageBase/AWS_sync/cropped/aedes/atlanticus/JHU-000518_03m.jpg	Train						Train						Train	train	train	train	train	train	Train						Train
1666	/opt/ImageBase/AWS_sync/cropped/aedes/atlanticus/JHU-000518_01m.jpg	Train						Train						Valid	train	train	train	train	train	Train						Train
1667	/opt/ImageBase/AWS_sync/cropped/aedes/atlanticus/JHU-000518_02m.jpg	Train						Train						Valid	train	train	train	train	train	Train						Train
1668	/opt/ImageBase/AWS_sync/cropped/aedes/atlanticus/JHU-000518_04m.jpg	Train						Train						Valid	train	train	train	train	train	Train						Train
1669	/opt/ImageBase/AWS_sync/cropped/aedes/atlanticus/JHU-002488_04m.jpg	Valid						Valid						Valid						Train						Valid	train	train	train	train	train
1670	/opt/ImageBase/AWS_sync/cropped/aedes/atlanticus/JHU-002488_03m.jpg	Valid						Valid						Valid						Train						Valid	train	train	train	train	train
1671	/opt/ImageBase/AWS_sync/cropped/aedes/atlanticus/JHU-002488_06m.jpg	Valid						Valid						Valid						Valid						Valid	train	train	train	train	train
1672	/opt/ImageBase/AWS_sync/cropped/aedes/atlanticus/JHU-002488_05m.jpg	Valid						Valid						Valid						Valid						Valid	train	train	train	train	train
1673	/opt/ImageBase/AWS_sync/cropped/aedes/atlanticus/JHU-002488_02m.jpg	Valid						Valid						Valid						Valid						Valid	train	train	train	train	train
1674	/opt/ImageBase/AWS_sync/cropped/aedes/atlanticus/JHU-002488_01m.jpg	Valid						Valid						Valid						Valid						Valid	train	train	train	train	train
1675	/opt/ImageBase/AWS_sync/cropped/aedes/atlanticus/JHU-000210_04m.jpg	Valid						Valid						Valid						Valid						Valid
1676	/opt/ImageBase/AWS_sync/cropped/aedes/atlanticus/JHU-000210_03m.jpg	Valid						Valid						Test						Valid						Valid
1677	/opt/ImageBase/AWS_sync/cropped/aedes/atlanticus/JHU-000210_01m.jpg	Valid						Valid						Test						Valid						Valid
1678	/opt/ImageBase/AWS_sync/cropped/aedes/atlanticus/JHU-000210_02m.jpg	Valid						Valid						Test						Valid						Test
1679	/opt/ImageBase/AWS_sync/cropped/aedes/atlanticus/JHU-002486_02m.jpg	Test	train	train	train	train	train	Test						Test						Valid						Test
1680	/opt/ImageBase/AWS_sync/cropped/aedes/atlanticus/JHU-002486_03m.jpg	Test	train	train	train	train	train	Test						Test						Test						Test
1681	/opt/ImageBase/AWS_sync/cropped/aedes/atlanticus/JHU-002486_04m.jpg	Test	train	train	train	train	train	Test						Test						Test						Test
1682	/opt/ImageBase/AWS_sync/cropped/aedes/atlanticus/JHU-002486_01m.jpg	Test	train	train	train	train	train	Test						Test						Test						Test
1683	/opt/ImageBase/AWS_sync/cropped/aedes/atlanticus/JHU-000507_04m.jpg	Test	train	train	train	train	train	Test						Test						Test						Test
1684	/opt/ImageBase/AWS_sync/cropped/aedes/atlanticus/JHU-000507_01m.jpg	Test	train	train	train	train	train	Test						Test						Test						Test
1685	/opt/ImageBase/AWS_sync/cropped/aedes/atlanticus/JHU-000507_05m.jpg	Test	train	train	train	train	train	Test						Test						Test						Test
1686	/opt/ImageBase/AWS_sync/cropped/aedes/atlanticus/JHU-000507_02m.jpg	Test	train	train	train	train	train	Test						Test						Test						Test
1687	/opt/ImageBase/AWS_sync/cropped/aedes/atlanticus/JHU-000507_03m.jpg	Test	train	train	train	train	train	Test						Test						Test						Test
1688	/opt/ImageBase/AWS_sync/cropped/aedes/atlanticus/JHU-002487_03m.jpg	Test	train	train	train	train	train	Test						Test						Test						Test
1689	/opt/ImageBase/AWS_sync/cropped/aedes/atlanticus/JHU-002487_02m.jpg	Test	train	train	train	train	train	Test						Test						Test						Test
1690	/opt/ImageBase/AWS_sync/cropped/aedes/atlanticus/JHU-002487_05m.jpg	Test	train	train	train	train	train	Test						Test						Test						Test
1691	/opt/ImageBase/AWS_sync/cropped/aedes/atlanticus/JHU-002487_01m.jpg	Test	train	train	train	train	train	Test						Test						Test						Test
1692	/opt/ImageBase/AWS_sync/cropped/aedes/atlanticus/JHU-002487_04m.jpg	Test	train	train	train	train	train	Test						Test						Test						Test
1693	/opt/ImageBase/AWS_sync/cropped/aedes/canadensis/JHU-007609_01m.jpg	Train						Train						Train						Train						Train
1694	/opt/ImageBase/AWS_sync/cropped/aedes/canadensis/JHU-007609_03m.jpg	Train						Train						Train						Train						Train
1695	/opt/ImageBase/AWS_sync/cropped/aedes/canadensis/JHU-007609_02m.jpg	Train						Train						Train						Train						Train
1696	/opt/ImageBase/AWS_sync/cropped/aedes/canadensis/JHU-007607_03m.jpg	Train						Train						Train						Train						Train
1697	/opt/ImageBase/AWS_sync/cropped/aedes/canadensis/JHU-007607_01m.jpg	Train						Train						Train						Train						Train
1698	/opt/ImageBase/AWS_sync/cropped/aedes/canadensis/JHU-007607_04m.jpg	Train						Train						Train						Train						Train
1699	/opt/ImageBase/AWS_sync/cropped/aedes/canadensis/JHU-007607_02m.jpg	Train						Train						Train						Train						Train
1700	/opt/ImageBase/AWS_sync/cropped/aedes/canadensis/JHU-007596_01m.jpg	Train						Train						Train	U1 test	U1 test	U1 test	U1 test	U1 test	Train	U1 test	U1 test	U1 test	U1 test	U1 test	Train
1701	/opt/ImageBase/AWS_sync/cropped/aedes/canadensis/JHU-007596_02m.jpg	Train						Train						Train	U1 test	U1 test	U1 test	U1 test	U1 test	Train	U1 test	U1 test	U1 test	U1 test	U1 test	Train
1702	/opt/ImageBase/AWS_sync/cropped/aedes/canadensis/JHU-007596_03m.jpg	Train						Train						Train	U1 test	U1 test	U1 test	U1 test	U1 test	Train	U1 test	U1 test	U1 test	U1 test	U1 test	Train
1703	/opt/ImageBase/AWS_sync/cropped/aedes/canadensis/JHU-007611_04m.jpg	Train						Train						Train	U1 test	U1 test	U1 test	U1 test	U1 test	Train						Train
1704	/opt/ImageBase/AWS_sync/cropped/aedes/canadensis/JHU-007611_03m.jpg	Train						Train						Train	U1 test	U1 test	U1 test	U1 test	U1 test	Train						Train
1705	/opt/ImageBase/AWS_sync/cropped/aedes/canadensis/JHU-007611_02m.jpg	Train						Train						Train	U1 test	U1 test	U1 test	U1 test	U1 test	Train						Train
1706	/opt/ImageBase/AWS_sync/cropped/aedes/canadensis/JHU-007611_01m.jpg	Train						Train						Train	U1 test	U1 test	U1 test	U1 test	U1 test	Train						Train
1707	/opt/ImageBase/AWS_sync/cropped/aedes/canadensis/JHU-007598_02m.jpg	Train						Train						Train						Train	U1 test	U1 test	U1 test	U1 test	U1 test	Train
1708	/opt/ImageBase/AWS_sync/cropped/aedes/canadensis/JHU-007598_03m.jpg	Train						Train						Train						Train	U1 test	U1 test	U1 test	U1 test	U1 test	Train
1709	/opt/ImageBase/AWS_sync/cropped/aedes/canadensis/JHU-007598_01m.jpg	Train						Train						Train						Train	U1 test	U1 test	U1 test	U1 test	U1 test	Train
1710	/opt/ImageBase/AWS_sync/cropped/aedes/canadensis/JHU-007614_02m.jpg	Train						Train	train	train	train	train	train	Train	train	train	train	train	train	Train						Train
1711	/opt/ImageBase/AWS_sync/cropped/aedes/canadensis/JHU-007614_01m.jpg	Train						Train	train	train	train	train	train	Train	train	train	train	train	train	Train						Train
1712	/opt/ImageBase/AWS_sync/cropped/aedes/canadensis/JHU-007614_03m.jpg	Train						Train	train	train	train	train	train	Train	train	train	train	train	train	Train						Train
1713	/opt/ImageBase/AWS_sync/cropped/aedes/canadensis/JHU-007600_01m.jpg	Train						Train						Train						Train	train	train	train	train	train	Train	train	train	train	train	train
1714	/opt/ImageBase/AWS_sync/cropped/aedes/canadensis/JHU-007600_03m.jpg	Train						Train						Train						Train	train	train	train	train	train	Train	train	train	train	train	train
1715	/opt/ImageBase/AWS_sync/cropped/aedes/canadensis/JHU-007600_02m.jpg	Train						Train						Train						Train	train	train	train	train	train	Train	train	train	train	train	train
1716	/opt/ImageBase/AWS_sync/cropped/aedes/canadensis/JHU-007613_03m.jpg	Train						Train	train	train	train	train	train	Train	train	train	train	train	train	Train						Train
1717	/opt/ImageBase/AWS_sync/cropped/aedes/canadensis/JHU-007613_02m.jpg	Train						Train	train	train	train	train	train	Train	train	train	train	train	train	Train						Train
1718	/opt/ImageBase/AWS_sync/cropped/aedes/canadensis/JHU-007613_01m.jpg	Train						Train	train	train	train	train	train	Train	train	train	train	train	train	Train						Train
1719	/opt/ImageBase/AWS_sync/cropped/aedes/canadensis/JHU-007599_01m.jpg	Train						Train						Train						Train						Train
1720	/opt/ImageBase/AWS_sync/cropped/aedes/canadensis/JHU-007599_02m.jpg	Train						Train						Train						Train						Train
1721	/opt/ImageBase/AWS_sync/cropped/aedes/canadensis/JHU-007599_03m.jpg	Train						Train						Train						Train						Train
1722	/opt/ImageBase/AWS_sync/cropped/aedes/canadensis/JHU-005351_01m.jpg	Train						Train						Train						Train	train	train	train	train	train	Train
1723	/opt/ImageBase/AWS_sync/cropped/aedes/canadensis/JHU-005351_03m.jpg	Train						Train						Train						Train	train	train	train	train	train	Train
1724	/opt/ImageBase/AWS_sync/cropped/aedes/canadensis/JHU-005351_05m.jpg	Train						Train						Train						Train	train	train	train	train	train	Train
1725	/opt/ImageBase/AWS_sync/cropped/aedes/canadensis/JHU-005351_04m.jpg	Train						Train						Train						Train	train	train	train	train	train	Train
1726	/opt/ImageBase/AWS_sync/cropped/aedes/canadensis/JHU-005351_02m.jpg	Train						Train						Train						Train	train	train	train	train	train	Train
1727	/opt/ImageBase/AWS_sync/cropped/aedes/canadensis/JHU-005270_05m.jpg	Train						Train						Train						Train						Train
1728	/opt/ImageBase/AWS_sync/cropped/aedes/canadensis/JHU-005270_02m.jpg	Train						Train						Train						Train						Train
1729	/opt/ImageBase/AWS_sync/cropped/aedes/canadensis/JHU-005270_04m.jpg	Train						Train						Train						Train						Train
1730	/opt/ImageBase/AWS_sync/cropped/aedes/canadensis/JHU-005270_01m.jpg	Train						Train						Train						Train						Train
1731	/opt/ImageBase/AWS_sync/cropped/aedes/canadensis/JHU-005270_03m.jpg	Train						Train						Train						Train						Train
1732	/opt/ImageBase/AWS_sync/cropped/aedes/canadensis/JHU-007612_03m.jpg	Train						Train						Train						Train						Train
1733	/opt/ImageBase/AWS_sync/cropped/aedes/canadensis/JHU-007612_02m.jpg	Train						Train						Train						Train						Train
1734	/opt/ImageBase/AWS_sync/cropped/aedes/canadensis/JHU-007612_01m.jpg	Train						Train						Train						Train						Train
1735	/opt/ImageBase/AWS_sync/cropped/aedes/canadensis/JHU-007604_02m.jpg	Train						Train						Train						Train						Train
1736	/opt/ImageBase/AWS_sync/cropped/aedes/canadensis/JHU-007604_04m.jpg	Train						Train						Train						Train						Train
1737	/opt/ImageBase/AWS_sync/cropped/aedes/canadensis/JHU-007604_03m.jpg	Train						Train						Train						Train						Train
1738	/opt/ImageBase/AWS_sync/cropped/aedes/canadensis/JHU-007604_01m.jpg	Train						Train						Train						Train						Train
1739	/opt/ImageBase/AWS_sync/cropped/aedes/canadensis/JHU-007610_01m.jpg	Train						Train						Train						Train	train	train	train	train	train	Train
1740	/opt/ImageBase/AWS_sync/cropped/aedes/canadensis/JHU-007610_02m.jpg	Train						Train						Train						Train	train	train	train	train	train	Train
1741	/opt/ImageBase/AWS_sync/cropped/aedes/canadensis/JHU-007610_04m.jpg	Train						Train						Train						Train	train	train	train	train	train	Train
1742	/opt/ImageBase/AWS_sync/cropped/aedes/canadensis/JHU-007610_03m.jpg	Train						Train						Train						Train	train	train	train	train	train	Train
1743	/opt/ImageBase/AWS_sync/cropped/aedes/canadensis/JHU-007592_04m.jpg	Train						Train						Train						Train						Train
1744	/opt/ImageBase/AWS_sync/cropped/aedes/canadensis/JHU-007592_01m.jpg	Train						Train						Train						Train						Train
1745	/opt/ImageBase/AWS_sync/cropped/aedes/canadensis/JHU-007592_02m.jpg	Train						Train						Train						Train						Train
1746	/opt/ImageBase/AWS_sync/cropped/aedes/canadensis/JHU-007592_03m.jpg	Train						Train						Train						Train						Train
1747	/opt/ImageBase/AWS_sync/cropped/aedes/canadensis/JHU-007603_04m.jpg	Train						Train						Train						Train						Train
1748	/opt/ImageBase/AWS_sync/cropped/aedes/canadensis/JHU-007603_03m.jpg	Train						Train						Train						Train						Train
1749	/opt/ImageBase/AWS_sync/cropped/aedes/canadensis/JHU-007603_02m.jpg	Train						Train						Train						Train						Train
1750	/opt/ImageBase/AWS_sync/cropped/aedes/canadensis/JHU-007603_01m.jpg	Train						Train						Train						Train						Train
1751	/opt/ImageBase/AWS_sync/cropped/aedes/canadensis/JHU-005273_02m.jpg	Train						Train						Train						Train						Train
1752	/opt/ImageBase/AWS_sync/cropped/aedes/canadensis/JHU-005273_04m.jpg	Train						Train						Train						Train						Train
1753	/opt/ImageBase/AWS_sync/cropped/aedes/canadensis/JHU-005273_03m.jpg	Train						Train						Train						Train						Train
1754	/opt/ImageBase/AWS_sync/cropped/aedes/canadensis/JHU-005273_01m.jpg	Train						Train						Train						Train						Train
1755	/opt/ImageBase/AWS_sync/cropped/aedes/canadensis/JHU-005273_05m.jpg	Train						Train						Train						Train						Train
1756	/opt/ImageBase/AWS_sync/cropped/aedes/canadensis/JHU-005272_06m.jpg	Train						Train						Train	train	train	train	train	train	Train						Train
1757	/opt/ImageBase/AWS_sync/cropped/aedes/canadensis/JHU-005272_04m.jpg	Train						Train						Train	train	train	train	train	train	Train						Train
1758	/opt/ImageBase/AWS_sync/cropped/aedes/canadensis/JHU-005272_03m.jpg	Train						Train						Train	train	train	train	train	train	Train						Train
1759	/opt/ImageBase/AWS_sync/cropped/aedes/canadensis/JHU-005272_05m.jpg	Train						Train						Train	train	train	train	train	train	Train						Train
1760	/opt/ImageBase/AWS_sync/cropped/aedes/canadensis/JHU-005272_01m.jpg	Train						Train						Train	train	train	train	train	train	Train						Train
1761	/opt/ImageBase/AWS_sync/cropped/aedes/canadensis/JHU-005272_02m.jpg	Train						Train						Train	train	train	train	train	train	Train						Train
1762	/opt/ImageBase/AWS_sync/cropped/aedes/canadensis/JHU-007594_03m.jpg	Train						Train						Train						Train						Train	U1 test	train	train	train	U1 test
1763	/opt/ImageBase/AWS_sync/cropped/aedes/canadensis/JHU-007594_02m.jpg	Train						Train						Train						Train						Train	U1 test	train	train	train	U1 test
1764	/opt/ImageBase/AWS_sync/cropped/aedes/canadensis/JHU-007594_01m.jpg	Train						Train						Train						Train						Train	U1 test	train	train	train	U1 test
1765	/opt/ImageBase/AWS_sync/cropped/aedes/canadensis/JHU-007597_01m.jpg	Train						Train						Train						Train						Train	U1 test	train	train	train	U1 test
1766	/opt/ImageBase/AWS_sync/cropped/aedes/canadensis/JHU-007597_02m.jpg	Train						Train						Train						Train						Train	U1 test	train	train	train	U1 test
1767	/opt/ImageBase/AWS_sync/cropped/aedes/canadensis/JHU-007597_03m.jpg	Train						Train						Train						Train						Train	U1 test	train	train	train	U1 test
1768	/opt/ImageBase/AWS_sync/cropped/aedes/canadensis/JHU-007602_02m.jpg	Train						Train						Train						Train						Train
1769	/opt/ImageBase/AWS_sync/cropped/aedes/canadensis/JHU-007602_01m.jpg	Train						Train						Train						Train						Train
1770	/opt/ImageBase/AWS_sync/cropped/aedes/canadensis/JHU-007602_03m.jpg	Train						Train						Train						Train						Train
1771	/opt/ImageBase/AWS_sync/cropped/aedes/canadensis/JHU-005354_04m.jpg	Train						Train	train	train	train	train	train	Train						Train						Train	train	train	train	train	train
1772	/opt/ImageBase/AWS_sync/cropped/aedes/canadensis/JHU-005354_02m.jpg	Train						Train	train	train	train	train	train	Train						Train						Train	train	train	train	train	train
1773	/opt/ImageBase/AWS_sync/cropped/aedes/canadensis/JHU-005354_03m.jpg	Train						Train	train	train	train	train	train	Train						Train						Train	train	train	train	train	train
1774	/opt/ImageBase/AWS_sync/cropped/aedes/canadensis/JHU-005354_01m.jpg	Train						Train	train	train	train	train	train	Train						Train						Train	train	train	train	train	train
1775	/opt/ImageBase/AWS_sync/cropped/aedes/canadensis/JHU-007601_02m.jpg	Train						Train						Train						Train						Train
1776	/opt/ImageBase/AWS_sync/cropped/aedes/canadensis/JHU-007601_01m.jpg	Train						Train						Train						Train						Train
1777	/opt/ImageBase/AWS_sync/cropped/aedes/canadensis/JHU-007601_03m.jpg	Train						Train						Train						Train						Train
1778	/opt/ImageBase/AWS_sync/cropped/aedes/canadensis/JHU-007605_01m.jpg	Train						Train	U1 test	U1 test	U1 test	U1 test	U1 test	Train						Train						Train	train	train	train	train	train
1779	/opt/ImageBase/AWS_sync/cropped/aedes/canadensis/JHU-007605_03m.jpg	Train						Train	U1 test	U1 test	U1 test	U1 test	U1 test	Train						Train						Train	train	train	train	train	train
1780	/opt/ImageBase/AWS_sync/cropped/aedes/canadensis/JHU-007605_02m.jpg	Train						Train	U1 test	U1 test	U1 test	U1 test	U1 test	Train						Train						Train	train	train	train	train	train
1781	/opt/ImageBase/AWS_sync/cropped/aedes/canadensis/JHU-007591_02m.jpg	Valid						Train						Train						Train						Train
1782	/opt/ImageBase/AWS_sync/cropped/aedes/canadensis/JHU-007591_03m.jpg	Valid						Train						Train						Train						Train
1783	/opt/ImageBase/AWS_sync/cropped/aedes/canadensis/JHU-007591_01m.jpg	Valid						Train						Valid						Train						Train
1784	/opt/ImageBase/AWS_sync/cropped/aedes/canadensis/JHU-005353_02m.jpg	Valid						Train						Valid						Train						Train
1785	/opt/ImageBase/AWS_sync/cropped/aedes/canadensis/JHU-005353_03m.jpg	Valid						Train						Valid						Train						Train
1786	/opt/ImageBase/AWS_sync/cropped/aedes/canadensis/JHU-005353_05m.jpg	Valid						Train						Valid						Train						Valid
1787	/opt/ImageBase/AWS_sync/cropped/aedes/canadensis/JHU-005353_01m.jpg	Valid						Train						Valid						Train						Valid
1788	/opt/ImageBase/AWS_sync/cropped/aedes/canadensis/JHU-005353_04m.jpg	Valid						Valid						Valid						Valid						Valid
1789	/opt/ImageBase/AWS_sync/cropped/aedes/canadensis/JHU-005271_02m.jpg	Valid						Valid						Valid						Valid						Valid
1790	/opt/ImageBase/AWS_sync/cropped/aedes/canadensis/JHU-005271_04m.jpg	Valid						Valid						Valid						Valid						Valid
1791	/opt/ImageBase/AWS_sync/cropped/aedes/canadensis/JHU-005271_01m.jpg	Valid						Valid						Valid						Valid						Valid
1792	/opt/ImageBase/AWS_sync/cropped/aedes/canadensis/JHU-005271_03m.jpg	Valid						Valid						Valid						Valid						Valid
1793	/opt/ImageBase/AWS_sync/cropped/aedes/canadensis/JHU-007595_03m.jpg	Valid						Valid	U1 test	U1 test	U1 test	U1 test	U1 test	Valid						Valid						Valid
1794	/opt/ImageBase/AWS_sync/cropped/aedes/canadensis/JHU-007595_01m.jpg	Valid						Valid	U1 test	U1 test	U1 test	U1 test	U1 test	Valid						Valid						Valid
1795	/opt/ImageBase/AWS_sync/cropped/aedes/canadensis/JHU-007595_02m.jpg	Valid						Valid	U1 test	U1 test	U1 test	U1 test	U1 test	Valid						Valid						Valid
1796	/opt/ImageBase/AWS_sync/cropped/aedes/canadensis/JHU-007606_01m.jpg	Valid						Valid						Valid						Valid						Valid
1797	/opt/ImageBase/AWS_sync/cropped/aedes/canadensis/JHU-007606_03m.jpg	Valid						Valid						Valid						Valid						Valid
1798	/opt/ImageBase/AWS_sync/cropped/aedes/canadensis/JHU-007606_02m.jpg	Valid						Valid						Valid						Valid						Valid
1799	/opt/ImageBase/AWS_sync/cropped/aedes/canadensis/JHU-007593_01m.jpg	Test	train	train	train	train	train	Valid						Valid						Valid						Valid
1800	/opt/ImageBase/AWS_sync/cropped/aedes/canadensis/JHU-007593_02m.jpg	Test	train	train	train	train	train	Valid						Valid						Valid						Valid
1801	/opt/ImageBase/AWS_sync/cropped/aedes/canadensis/JHU-007593_04m.jpg	Test	train	train	train	train	train	Valid						Valid						Valid						Valid
1802	/opt/ImageBase/AWS_sync/cropped/aedes/canadensis/JHU-007593_03m.jpg	Test	train	train	train	train	train	Valid						Test						Valid						Valid
1803	/opt/ImageBase/AWS_sync/cropped/aedes/canadensis/JHU-007608_01m.jpg	Test	U1 test	U1 test	U1 test	U1 test	U1 test	Valid						Test						Test						Valid
1804	/opt/ImageBase/AWS_sync/cropped/aedes/canadensis/JHU-007608_03m.jpg	Test	U1 test	U1 test	U1 test	U1 test	U1 test	Valid						Test						Test						Valid
1805	/opt/ImageBase/AWS_sync/cropped/aedes/canadensis/JHU-007608_02m.jpg	Test	U1 test	U1 test	U1 test	U1 test	U1 test	Test						Test						Test						Test
1806	/opt/ImageBase/AWS_sync/cropped/aedes/canadensis/JHU-005352_05m.jpg	Test	train	train	train	train	train	Test						Test						Test						Test
1807	/opt/ImageBase/AWS_sync/cropped/aedes/canadensis/JHU-005352_02m.jpg	Test	train	train	train	train	train	Test						Test						Test						Test
1808	/opt/ImageBase/AWS_sync/cropped/aedes/canadensis/JHU-005352_04m.jpg	Test	train	train	train	train	train	Test						Test						Test						Test
1809	/opt/ImageBase/AWS_sync/cropped/aedes/canadensis/JHU-005352_01m.jpg	Test	train	train	train	train	train	Test						Test						Test						Test
1810	/opt/ImageBase/AWS_sync/cropped/aedes/canadensis/JHU-005352_03m.jpg	Test	train	train	train	train	train	Test						Test						Test						Test
1811	/opt/ImageBase/AWS_sync/cropped/aedes/canadensis/JHU-007590_03m.jpg	Test	train	train	train	train	train	Test						Test						Test						Test
1812	/opt/ImageBase/AWS_sync/cropped/aedes/canadensis/JHU-007590_02m.jpg	Test	train	train	train	train	train	Test						Test						Test						Test
1813	/opt/ImageBase/AWS_sync/cropped/aedes/canadensis/JHU-007590_01m.jpg	Test	train	train	train	train	train	Test						Test						Test						Test
1814	/opt/ImageBase/AWS_sync/cropped/aedes/canadensis/JHU-001348_07m.jpg	Test	train	train	train	train	train	Test						Test						Test						Test
1815	/opt/ImageBase/AWS_sync/cropped/aedes/canadensis/JHU-001348_03m.jpg	Test	train	train	train	train	train	Test						Test						Test						Test
1816	/opt/ImageBase/AWS_sync/cropped/aedes/canadensis/JHU-001348_01m.jpg	Test	train	train	train	train	train	Test						Test						Test						Test
1817	/opt/ImageBase/AWS_sync/cropped/aedes/canadensis/JHU-001348_05m.jpg	Test	train	train	train	train	train	Test						Test						Test						Test
1818	/opt/ImageBase/AWS_sync/cropped/aedes/canadensis/JHU-001348_04m.jpg	Test	train	train	train	train	train	Test						Test						Test						Test
1819	/opt/ImageBase/AWS_sync/cropped/aedes/canadensis/JHU-001348_02m.jpg	Test	train	train	train	train	train	Test						Test						Test						Test
1820	/opt/ImageBase/AWS_sync/cropped/aedes/canadensis/JHU-001348_06m.jpg	Test	train	train	train	train	train	Test						Test						Test						Test
1821	/opt/ImageBase/AWS_sync/cropped/aedes/cantator/JHU-005331_03m.jpg		train	train	train	train	N		train	train	train	N	N		train	train	train	N	N		train	N	train	train	N		train	train	N	train	N
1822	/opt/ImageBase/AWS_sync/cropped/aedes/cantator/JHU-005332_04m.jpg		train	train	train	train	N		train	train	train	N	N		U2 test	U2 test	U2 test	N	N		U2 test	N	train	train	N		train	train	N	train	N
1823	/opt/ImageBase/AWS_sync/cropped/aedes/cantator/JHU-005332_02m.jpg		train	train	train	train	N		train	train	train	N	N		U2 test	U2 test	U2 test	N	N		U2 test	N	train	train	N		train	train	N	train	N
1824	/opt/ImageBase/AWS_sync/cropped/aedes/cantator/JHU-005331_04m.jpg		train	train	train	train	N		train	train	train	N	N		train	train	train	N	N		train	N	train	train	N		train	train	N	train	N
1825	/opt/ImageBase/AWS_sync/cropped/aedes/cantator/JHU-005332_01m.jpg		train	train	train	train	N		train	train	train	N	N		U2 test	U2 test	U2 test	N	N		U2 test	N	train	train	N		train	train	N	train	N
1826	/opt/ImageBase/AWS_sync/cropped/aedes/cantator/JHU-005331_02m.jpg		train	train	train	train	N		train	train	train	N	N		train	train	train	N	N		train	N	train	train	N		train	train	N	train	N
1827	/opt/ImageBase/AWS_sync/cropped/aedes/cantator/JHU-005332_03m.jpg		train	train	train	train	N		train	train	train	N	N		U2 test	U2 test	U2 test	N	N		U2 test	N	train	train	N		train	train	N	train	N
1828	/opt/ImageBase/AWS_sync/cropped/aedes/cantator/JHU-005331_01m.jpg		train	train	train	train	N		train	train	train	N	N		train	train	train	N	N		train	N	train	train	N		train	train	N	train	N
1829	/opt/ImageBase/AWS_sync/cropped/aedes/condolescens/JHU-000460_04m.jpg		train	train	N	train	train		train	train	train	N	train		N	N	N	N	train		N	N	train	train	train		train	train	train	N	N
1830	/opt/ImageBase/AWS_sync/cropped/aedes/condolescens/JHU-000354_01m.jpg		train	train	N	train	train		train	train	train	N	train		N	N	N	N	train		N	N	train	train	U2 test		U2 test	U2 test	train	N	N
1831	/opt/ImageBase/AWS_sync/cropped/aedes/condolescens/JHU-000354_05m.jpg		train	train	N	train	train		train	train	train	N	train		N	N	N	N	train		N	N	train	train	U2 test		U2 test	U2 test	train	N	N
1832	/opt/ImageBase/AWS_sync/cropped/aedes/condolescens/JHU-000354_04m.jpg		train	train	N	train	train		train	train	train	N	train		N	N	N	N	train		N	N	train	train	U2 test		U2 test	U2 test	train	N	N
1833	/opt/ImageBase/AWS_sync/cropped/aedes/condolescens/JHU-000460_02m.jpg		train	train	N	train	train		train	train	train	N	train		N	N	N	N	train		N	N	train	train	train		train	train	train	N	N
1834	/opt/ImageBase/AWS_sync/cropped/aedes/condolescens/JHU-000354_02m.jpg		train	train	N	train	train		train	train	train	N	train		N	N	N	N	train		N	N	train	train	U2 test		U2 test	U2 test	train	N	N
1835	/opt/ImageBase/AWS_sync/cropped/aedes/condolescens/JHU-000460_01m.jpg		train	train	N	train	train		train	train	train	N	train		N	N	N	N	train		N	N	train	train	train		train	train	train	N	N
1836	/opt/ImageBase/AWS_sync/cropped/aedes/condolescens/JHU-000460_03m.jpg		train	train	N	train	train		train	train	train	N	train		N	N	N	N	train		N	N	train	train	train		train	train	train	N	N
1837	/opt/ImageBase/AWS_sync/cropped/aedes/condolescens/JHU-000460_05m.jpg		train	train	N	train	train		train	train	train	N	train		N	N	N	N	train		N	N	train	train	train		train	train	train	N	N
1838	/opt/ImageBase/AWS_sync/cropped/aedes/condolescens/JHU-000354_03m.jpg		train	train	N	train	train		train	train	train	N	train		N	N	N	N	train		N	N	train	train	U2 test		U2 test	U2 test	train	N	N
1839	/opt/ImageBase/AWS_sync/cropped/aedes/dorsalis/JHU-002105_02m.jpg	Train						Train	train	train	train	train	train	Train							train	train	train	N	train	Train
1840	/opt/ImageBase/AWS_sync/cropped/aedes/dorsalis/JHU-002105_03m.jpg	Train						Train	train	train	train	train	train	Train							train	train	train	N	train	Train
1841	/opt/ImageBase/AWS_sync/cropped/aedes/dorsalis/JHU-002105_04m.jpg	Train						Train	train	train	train	train	train	Train							train	train	train	N	train	Train
1842	/opt/ImageBase/AWS_sync/cropped/aedes/dorsalis/JHU-002105_05m.jpg	Train						Train	train	train	train	train	train	Train							train	train	train	N	train	Train
1843	/opt/ImageBase/AWS_sync/cropped/aedes/dorsalis/JHU-002105_01m.jpg	Train						Train	train	train	train	train	train	Train							train	train	train	N	train	Train
1844	/opt/ImageBase/AWS_sync/cropped/aedes/dorsalis/JHU-002097_02m.jpg	Train						Train						Train							train	train	train	N	train	Train
1845	/opt/ImageBase/AWS_sync/cropped/aedes/dorsalis/JHU-002097_03m.jpg	Train						Train						Train							train	train	train	N	train	Train
1846	/opt/ImageBase/AWS_sync/cropped/aedes/dorsalis/JHU-002097_04m.jpg	Train						Train						Train							train	train	train	N	train	Train
1847	/opt/ImageBase/AWS_sync/cropped/aedes/dorsalis/JHU-002097_01m.jpg	Train						Train						Train							train	train	train	N	train	Train
1848	/opt/ImageBase/AWS_sync/cropped/aedes/dorsalis/JHU-002097_05m.jpg	Train						Train						Train							train	train	train	N	train	Train
1849	/opt/ImageBase/AWS_sync/cropped/aedes/dorsalis/JHU-002138_02m.jpg	Train						Train						Train	K test	K test	K test	K test	K test		U2 test	U2 test	U2 test	N	U2 test	Train
1850	/opt/ImageBase/AWS_sync/cropped/aedes/dorsalis/JHU-002138_04m.jpg	Train						Train						Train	K test	K test	K test	K test	K test		U2 test	U2 test	U2 test	N	U2 test	Train
1851	/opt/ImageBase/AWS_sync/cropped/aedes/dorsalis/JHU-002138_05m.jpg	Train						Train						Train	K test	K test	K test	K test	K test		U2 test	U2 test	U2 test	N	U2 test	Train
1852	/opt/ImageBase/AWS_sync/cropped/aedes/dorsalis/JHU-002138_01m.jpg	Train						Train						Train	K test	K test	K test	K test	K test		U2 test	U2 test	U2 test	N	U2 test	Train
1853	/opt/ImageBase/AWS_sync/cropped/aedes/dorsalis/JHU-002138_03m.jpg	Train						Train						Train	K test	K test	K test	K test	K test		U2 test	U2 test	U2 test	N	U2 test	Train
1854	/opt/ImageBase/AWS_sync/cropped/aedes/dorsalis/JHU-002104_01m.jpg	Train						Train						Train							train	train	train	N	train	Train
1855	/opt/ImageBase/AWS_sync/cropped/aedes/dorsalis/JHU-002104_05m.jpg	Train						Train						Train							train	train	train	N	train	Train
1856	/opt/ImageBase/AWS_sync/cropped/aedes/dorsalis/JHU-002104_04m.jpg	Train						Train						Train							train	train	train	N	train	Train
1857	/opt/ImageBase/AWS_sync/cropped/aedes/dorsalis/JHU-002104_03m.jpg	Train						Train						Train							train	train	train	N	train	Train
1858	/opt/ImageBase/AWS_sync/cropped/aedes/dorsalis/JHU-002104_02m.jpg	Train						Train						Train							train	train	train	N	train	Train
1859	/opt/ImageBase/AWS_sync/cropped/aedes/dorsalis/JHU-002141_06m.jpg	Train						Train						Train	train	train	train	train	train		train	train	train	N	train	Train
1860	/opt/ImageBase/AWS_sync/cropped/aedes/dorsalis/JHU-002141_04m.jpg	Train						Train						Train	train	train	train	train	train		train	train	train	N	train	Train
1861	/opt/ImageBase/AWS_sync/cropped/aedes/dorsalis/JHU-002141_01m.jpg	Train						Train						Train	train	train	train	train	train		train	train	train	N	train	Train
1862	/opt/ImageBase/AWS_sync/cropped/aedes/dorsalis/JHU-002141_02m.jpg	Train						Train						Train	train	train	train	train	train		train	train	train	N	train	Train
1863	/opt/ImageBase/AWS_sync/cropped/aedes/dorsalis/JHU-002141_05m.jpg	Train						Train						Train	train	train	train	train	train		train	train	train	N	train	Train
1864	/opt/ImageBase/AWS_sync/cropped/aedes/dorsalis/JHU-002141_03m.jpg	Train						Train						Train	train	train	train	train	train		train	train	train	N	train	Train
1865	/opt/ImageBase/AWS_sync/cropped/aedes/dorsalis/JHU-002140_01m.jpg	Train						Train	train	train	train	train	train	Train							train	train	train	N	train	Train
1866	/opt/ImageBase/AWS_sync/cropped/aedes/dorsalis/JHU-002140_02m.jpg	Train						Train	train	train	train	train	train	Train							train	train	train	N	train	Train
1867	/opt/ImageBase/AWS_sync/cropped/aedes/dorsalis/JHU-002140_03m.jpg	Train						Train	train	train	train	train	train	Train							train	train	train	N	train	Train
1868	/opt/ImageBase/AWS_sync/cropped/aedes/dorsalis/JHU-002140_05m.jpg	Train						Train	train	train	train	train	train	Train							train	train	train	N	train	Train
1869	/opt/ImageBase/AWS_sync/cropped/aedes/dorsalis/JHU-002140_06m.jpg	Train						Train	train	train	train	train	train	Train							train	train	train	N	train	Train
1870	/opt/ImageBase/AWS_sync/cropped/aedes/dorsalis/JHU-002140_04m.jpg	Train						Train	train	train	train	train	train	Train							train	train	train	N	train	Train
1871	/opt/ImageBase/AWS_sync/cropped/aedes/dorsalis/JHU-002122_03m.jpg	Train						Train						Train							train	U2 test	train	N	train	Train
1872	/opt/ImageBase/AWS_sync/cropped/aedes/dorsalis/JHU-002122_05m.jpg	Train						Train						Train							train	U2 test	train	N	train	Train
1873	/opt/ImageBase/AWS_sync/cropped/aedes/dorsalis/JHU-002122_07m.jpg	Train						Train						Train							train	U2 test	train	N	train	Train
1874	/opt/ImageBase/AWS_sync/cropped/aedes/dorsalis/JHU-002122_02m.jpg	Train						Train						Train							train	U2 test	train	N	train	Train
1875	/opt/ImageBase/AWS_sync/cropped/aedes/dorsalis/JHU-002122_01m.jpg	Train						Train						Train							train	U2 test	train	N	train	Train
1876	/opt/ImageBase/AWS_sync/cropped/aedes/dorsalis/JHU-002122_04m.jpg	Train						Train						Train							train	U2 test	train	N	train	Train
1877	/opt/ImageBase/AWS_sync/cropped/aedes/dorsalis/JHU-002122_06m.jpg	Train						Train						Train							train	U2 test	train	N	train	Train
1878	/opt/ImageBase/AWS_sync/cropped/aedes/dorsalis/JHU-002092_04m.jpg	Train						Train						Train							train	train	train	N	train	Train	train	train	train	train	train
1879	/opt/ImageBase/AWS_sync/cropped/aedes/dorsalis/JHU-002092_02m.jpg	Train						Train						Train							train	train	train	N	train	Train	train	train	train	train	train
1880	/opt/ImageBase/AWS_sync/cropped/aedes/dorsalis/JHU-002092_01m.jpg	Train						Train						Train							train	train	train	N	train	Train	train	train	train	train	train
1881	/opt/ImageBase/AWS_sync/cropped/aedes/dorsalis/JHU-002092_03m.jpg	Train						Train						Train							train	train	train	N	train	Train	train	train	train	train	train
1882	/opt/ImageBase/AWS_sync/cropped/aedes/dorsalis/JHU-002090_04m.jpg	Train						Train						Train							train	train	train	N	train	Train
1883	/opt/ImageBase/AWS_sync/cropped/aedes/dorsalis/JHU-002090_02m.jpg	Train						Train						Train							train	train	train	N	train	Train
1884	/opt/ImageBase/AWS_sync/cropped/aedes/dorsalis/JHU-002090_05m.jpg	Train						Train						Train							train	train	train	N	train	Train
1885	/opt/ImageBase/AWS_sync/cropped/aedes/dorsalis/JHU-002090_03m.jpg	Train						Train						Train							train	train	train	N	train	Train
1886	/opt/ImageBase/AWS_sync/cropped/aedes/dorsalis/JHU-002090_01m.jpg	Train						Train						Train							train	train	train	N	train	Train
1887	/opt/ImageBase/AWS_sync/cropped/aedes/dorsalis/JHU-002127_02m.jpg	Train						Train						Train							U2 test	U2 test	U2 test	N	U2 test	Train
1888	/opt/ImageBase/AWS_sync/cropped/aedes/dorsalis/JHU-002127_04m.jpg	Train						Train						Train							U2 test	U2 test	U2 test	N	U2 test	Train
1889	/opt/ImageBase/AWS_sync/cropped/aedes/dorsalis/JHU-002127_01m.jpg	Train						Train						Train							U2 test	U2 test	U2 test	N	U2 test	Train
1890	/opt/ImageBase/AWS_sync/cropped/aedes/dorsalis/JHU-002127_05m.jpg	Train						Train						Train							U2 test	U2 test	U2 test	N	U2 test	Train
1891	/opt/ImageBase/AWS_sync/cropped/aedes/dorsalis/JHU-002127_03m.jpg	Train						Train						Train							U2 test	U2 test	U2 test	N	U2 test	Train
1892	/opt/ImageBase/AWS_sync/cropped/aedes/dorsalis/JHU-002096_02m.jpg	Train						Train	train	train	train	train	train	Train							train	train	train	N	train	Train
1893	/opt/ImageBase/AWS_sync/cropped/aedes/dorsalis/JHU-002096_01m.jpg	Train						Train	train	train	train	train	train	Train							train	train	train	N	train	Train
1894	/opt/ImageBase/AWS_sync/cropped/aedes/dorsalis/JHU-002096_05m.jpg	Train						Train	train	train	train	train	train	Train							train	train	train	N	train	Train
1895	/opt/ImageBase/AWS_sync/cropped/aedes/dorsalis/JHU-002096_03m.jpg	Train						Train	train	train	train	train	train	Train							train	train	train	N	train	Train
1896	/opt/ImageBase/AWS_sync/cropped/aedes/dorsalis/JHU-002096_04m.jpg	Train						Train	train	train	train	train	train	Train							train	train	train	N	train	Train
1897	/opt/ImageBase/AWS_sync/cropped/aedes/dorsalis/JHU-002137_01m.jpg	Train						Train						Train							U2 test	U2 test	U2 test	N	U2 test	Train	train	train	train	train	train
1898	/opt/ImageBase/AWS_sync/cropped/aedes/dorsalis/JHU-002137_05m.jpg	Train						Train						Train							U2 test	U2 test	U2 test	N	U2 test	Train	train	train	train	train	train
1899	/opt/ImageBase/AWS_sync/cropped/aedes/dorsalis/JHU-002137_02m.jpg	Train						Train						Train							U2 test	U2 test	U2 test	N	U2 test	Train	train	train	train	train	train
1900	/opt/ImageBase/AWS_sync/cropped/aedes/dorsalis/JHU-002137_03m.jpg	Train						Train						Train							U2 test	U2 test	U2 test	N	U2 test	Train	train	train	train	train	train
1901	/opt/ImageBase/AWS_sync/cropped/aedes/dorsalis/JHU-002137_04m.jpg	Train						Train						Train							U2 test	U2 test	U2 test	N	U2 test	Train	train	train	train	train	train
1902	/opt/ImageBase/AWS_sync/cropped/aedes/dorsalis/JHU-002130_04m.jpg	Train						Train						Train							train	U2 test	U2 test	N	U2 test	Train
1903	/opt/ImageBase/AWS_sync/cropped/aedes/dorsalis/JHU-002130_06m.jpg	Train						Train						Train							train	U2 test	U2 test	N	U2 test	Train
1904	/opt/ImageBase/AWS_sync/cropped/aedes/dorsalis/JHU-002130_01m.jpg	Train						Train						Train							train	U2 test	U2 test	N	U2 test	Train
1905	/opt/ImageBase/AWS_sync/cropped/aedes/dorsalis/JHU-002130_05m.jpg	Train						Train						Train							train	U2 test	U2 test	N	U2 test	Train
1906	/opt/ImageBase/AWS_sync/cropped/aedes/dorsalis/JHU-002130_03m.jpg	Train						Train						Train							train	U2 test	U2 test	N	U2 test	Train
1907	/opt/ImageBase/AWS_sync/cropped/aedes/dorsalis/JHU-002130_02m.jpg	Train						Train						Train							train	U2 test	U2 test	N	U2 test	Train
1908	/opt/ImageBase/AWS_sync/cropped/aedes/dorsalis/JHU-001991_01m.jpg	Train						Train						Train							U2 test	U2 test	U2 test	N	U2 test	Train
1909	/opt/ImageBase/AWS_sync/cropped/aedes/dorsalis/JHU-001991_04m.jpg	Train						Train						Train							U2 test	U2 test	U2 test	N	U2 test	Train
1910	/opt/ImageBase/AWS_sync/cropped/aedes/dorsalis/JHU-001991_03m.jpg	Train						Train						Train							U2 test	U2 test	U2 test	N	U2 test	Train
1911	/opt/ImageBase/AWS_sync/cropped/aedes/dorsalis/JHU-001991_02m.jpg	Train						Train						Train							U2 test	U2 test	U2 test	N	U2 test	Train
1912	/opt/ImageBase/AWS_sync/cropped/aedes/dorsalis/JHU-001991_05m.jpg	Train						Train						Train							U2 test	U2 test	U2 test	N	U2 test	Train
1913	/opt/ImageBase/AWS_sync/cropped/aedes/dorsalis/JHU-002135_02m.jpg	Train						Train						Train							U2 test	U2 test	U2 test	N	U2 test	Train
1914	/opt/ImageBase/AWS_sync/cropped/aedes/dorsalis/JHU-002135_01m.jpg	Train						Train						Train							U2 test	U2 test	U2 test	N	U2 test	Train
1915	/opt/ImageBase/AWS_sync/cropped/aedes/dorsalis/JHU-002135_05m.jpg	Train						Train						Train							U2 test	U2 test	U2 test	N	U2 test	Train
1916	/opt/ImageBase/AWS_sync/cropped/aedes/dorsalis/JHU-002135_06m.jpg	Train						Train						Train							U2 test	U2 test	U2 test	N	U2 test	Train
1917	/opt/ImageBase/AWS_sync/cropped/aedes/dorsalis/JHU-002135_03m.jpg	Train						Train						Train							U2 test	U2 test	U2 test	N	U2 test	Train
1918	/opt/ImageBase/AWS_sync/cropped/aedes/dorsalis/JHU-002135_04m.jpg	Train						Train						Train							U2 test	U2 test	U2 test	N	U2 test	Train
1919	/opt/ImageBase/AWS_sync/cropped/aedes/dorsalis/JHU-002101_06m.jpg	Train						Train						Train							U2 test	U2 test	U2 test	N	U2 test	Train
1920	/opt/ImageBase/AWS_sync/cropped/aedes/dorsalis/JHU-002101_02m.jpg	Train						Train						Train							U2 test	U2 test	U2 test	N	U2 test	Train
1921	/opt/ImageBase/AWS_sync/cropped/aedes/dorsalis/JHU-002101_03m.jpg	Train						Train						Train							U2 test	U2 test	U2 test	N	U2 test	Train
1922	/opt/ImageBase/AWS_sync/cropped/aedes/dorsalis/JHU-002101_05m.jpg	Train						Train						Train							U2 test	U2 test	U2 test	N	U2 test	Train
1923	/opt/ImageBase/AWS_sync/cropped/aedes/dorsalis/JHU-002101_01m.jpg	Train						Train						Train							U2 test	U2 test	U2 test	N	U2 test	Train
1924	/opt/ImageBase/AWS_sync/cropped/aedes/dorsalis/JHU-002101_04m.jpg	Train						Train						Train							U2 test	U2 test	U2 test	N	U2 test	Train
1925	/opt/ImageBase/AWS_sync/cropped/aedes/dorsalis/JHU-002113_03m.jpg	Train						Train						Train							train	train	train	N	train	Train
1926	/opt/ImageBase/AWS_sync/cropped/aedes/dorsalis/JHU-002113_02m.jpg	Train						Train						Train							train	train	train	N	train	Train
1927	/opt/ImageBase/AWS_sync/cropped/aedes/dorsalis/JHU-002113_05m.jpg	Train						Train						Train							train	train	train	N	train	Train
1928	/opt/ImageBase/AWS_sync/cropped/aedes/dorsalis/JHU-002113_06m.jpg	Train						Train						Train							train	train	train	N	train	Train
1929	/opt/ImageBase/AWS_sync/cropped/aedes/dorsalis/JHU-002113_01m.jpg	Train						Train						Train							train	train	train	N	train	Train
1930	/opt/ImageBase/AWS_sync/cropped/aedes/dorsalis/JHU-002113_04m.jpg	Train						Train						Train							train	train	train	N	train	Train
1931	/opt/ImageBase/AWS_sync/cropped/aedes/dorsalis/JHU-002103_01m.jpg	Train						Train						Train							U2 test	U2 test	U2 test	N	U2 test	Train	K test	K test	K test	K test	K test
1932	/opt/ImageBase/AWS_sync/cropped/aedes/dorsalis/JHU-002103_05m.jpg	Train						Train						Train							U2 test	U2 test	U2 test	N	U2 test	Train	K test	K test	K test	K test	K test
1933	/opt/ImageBase/AWS_sync/cropped/aedes/dorsalis/JHU-002103_02m.jpg	Train						Train						Train							U2 test	U2 test	U2 test	N	U2 test	Train	K test	K test	K test	K test	K test
1934	/opt/ImageBase/AWS_sync/cropped/aedes/dorsalis/JHU-002103_04m.jpg	Train						Train						Train							U2 test	U2 test	U2 test	N	U2 test	Train	K test	K test	K test	K test	K test
1935	/opt/ImageBase/AWS_sync/cropped/aedes/dorsalis/JHU-002103_03m.jpg	Train						Train						Train							U2 test	U2 test	U2 test	N	U2 test	Train	K test	K test	K test	K test	K test
1936	/opt/ImageBase/AWS_sync/cropped/aedes/dorsalis/JHU-002129_03m.jpg	Train						Train						Train							train	train	train	N	train	Train
1937	/opt/ImageBase/AWS_sync/cropped/aedes/dorsalis/JHU-002129_05m.jpg	Train						Train						Train							train	train	train	N	train	Train
1938	/opt/ImageBase/AWS_sync/cropped/aedes/dorsalis/JHU-002129_01m.jpg	Train						Train						Train							train	train	train	N	train	Train
1939	/opt/ImageBase/AWS_sync/cropped/aedes/dorsalis/JHU-002129_04m.jpg	Train						Train						Train							train	train	train	N	train	Train
1940	/opt/ImageBase/AWS_sync/cropped/aedes/dorsalis/JHU-002129_02m.jpg	Train						Train						Train							train	train	train	N	train	Train
1941	/opt/ImageBase/AWS_sync/cropped/aedes/dorsalis/JHU-002110_04m.jpg	Train						Train						Train							U2 test	U2 test	U2 test	N	U2 test	Train
1942	/opt/ImageBase/AWS_sync/cropped/aedes/dorsalis/JHU-002110_02m.jpg	Train						Train						Train							U2 test	U2 test	U2 test	N	U2 test	Train
1943	/opt/ImageBase/AWS_sync/cropped/aedes/dorsalis/JHU-002110_01m.jpg	Train						Train						Train							U2 test	U2 test	U2 test	N	U2 test	Train
1944	/opt/ImageBase/AWS_sync/cropped/aedes/dorsalis/JHU-002110_05m.jpg	Train						Train						Train							U2 test	U2 test	U2 test	N	U2 test	Train
1945	/opt/ImageBase/AWS_sync/cropped/aedes/dorsalis/JHU-002110_03m.jpg	Train						Train						Train							U2 test	U2 test	U2 test	N	U2 test	Train
1946	/opt/ImageBase/AWS_sync/cropped/aedes/dorsalis/JHU-002106_02m.jpg	Train						Train						Train							U2 test	U2 test	U2 test	N	U2 test	Train	train	train	train	train	train
1947	/opt/ImageBase/AWS_sync/cropped/aedes/dorsalis/JHU-002106_01m.jpg	Train						Train						Train							U2 test	U2 test	U2 test	N	U2 test	Train	train	train	train	train	train
1948	/opt/ImageBase/AWS_sync/cropped/aedes/dorsalis/JHU-002106_03m.jpg	Train						Train						Train							U2 test	U2 test	U2 test	N	U2 test	Train	train	train	train	train	train
1949	/opt/ImageBase/AWS_sync/cropped/aedes/dorsalis/JHU-002106_05m.jpg	Train						Train						Train							U2 test	U2 test	U2 test	N	U2 test	Train	train	train	train	train	train
1950	/opt/ImageBase/AWS_sync/cropped/aedes/dorsalis/JHU-002106_04m.jpg	Train						Train						Train							U2 test	U2 test	U2 test	N	U2 test	Train	train	train	train	train	train
1951	/opt/ImageBase/AWS_sync/cropped/aedes/dorsalis/JHU-002123_03m.jpg	Train						Train						Train							U2 test	U2 test	U2 test	N	U2 test	Train
1952	/opt/ImageBase/AWS_sync/cropped/aedes/dorsalis/JHU-002123_02m.jpg	Train						Train						Train							U2 test	U2 test	U2 test	N	U2 test	Train
1953	/opt/ImageBase/AWS_sync/cropped/aedes/dorsalis/JHU-002123_05m.jpg	Train						Train						Train							U2 test	U2 test	U2 test	N	U2 test	Train
1954	/opt/ImageBase/AWS_sync/cropped/aedes/dorsalis/JHU-002123_01m.jpg	Train						Train						Train							U2 test	U2 test	U2 test	N	U2 test	Train
1955	/opt/ImageBase/AWS_sync/cropped/aedes/dorsalis/JHU-002123_04m.jpg	Train						Train						Train							U2 test	U2 test	U2 test	N	U2 test	Train
1956	/opt/ImageBase/AWS_sync/cropped/aedes/dorsalis/JHU-002125_01m.jpg	Train						Train	train	train	train	train	train	Train	train	train	train	train	train		train	train	train	N	train	Train
1957	/opt/ImageBase/AWS_sync/cropped/aedes/dorsalis/JHU-002125_02m.jpg	Train						Train	train	train	train	train	train	Train	train	train	train	train	train		train	train	train	N	train	Train
1958	/opt/ImageBase/AWS_sync/cropped/aedes/dorsalis/JHU-002125_03m.jpg	Train						Train	train	train	train	train	train	Train	train	train	train	train	train		train	train	train	N	train	Train
1959	/opt/ImageBase/AWS_sync/cropped/aedes/dorsalis/JHU-002125_04m.jpg	Train						Train	train	train	train	train	train	Train	train	train	train	train	train		train	train	train	N	train	Train
1960	/opt/ImageBase/AWS_sync/cropped/aedes/dorsalis/JHU-002098_01m.jpg	Train						Train	K test	K test	K test	K test	K test	Train	train	train	train	train	train		train	train	train	N	train	Train
1961	/opt/ImageBase/AWS_sync/cropped/aedes/dorsalis/JHU-002098_02m.jpg	Train						Train	K test	K test	K test	K test	K test	Train	train	train	train	train	train		train	train	train	N	train	Train
1962	/opt/ImageBase/AWS_sync/cropped/aedes/dorsalis/JHU-002098_06m.jpg	Train						Train	K test	K test	K test	K test	K test	Train	train	train	train	train	train		train	train	train	N	train	Train
1963	/opt/ImageBase/AWS_sync/cropped/aedes/dorsalis/JHU-002098_04m.jpg	Train						Train	K test	K test	K test	K test	K test	Train	train	train	train	train	train		train	train	train	N	train	Train
1964	/opt/ImageBase/AWS_sync/cropped/aedes/dorsalis/JHU-002098_03m.jpg	Train						Train	K test	K test	K test	K test	K test	Train	train	train	train	train	train		train	train	train	N	train	Train
1965	/opt/ImageBase/AWS_sync/cropped/aedes/dorsalis/JHU-002098_05m.jpg	Train						Train	K test	K test	K test	K test	K test	Train	train	train	train	train	train		train	train	train	N	train	Train
1966	/opt/ImageBase/AWS_sync/cropped/aedes/dorsalis/JHU-002124_03m.jpg	Train						Train						Train							U2 test	U2 test	U2 test	N	U2 test	Train
1967	/opt/ImageBase/AWS_sync/cropped/aedes/dorsalis/JHU-002124_06m.jpg	Train						Train						Train							U2 test	U2 test	U2 test	N	U2 test	Train
1968	/opt/ImageBase/AWS_sync/cropped/aedes/dorsalis/JHU-002124_01m.jpg	Train						Train						Train							U2 test	U2 test	U2 test	N	U2 test	Train
1969	/opt/ImageBase/AWS_sync/cropped/aedes/dorsalis/JHU-002124_02m.jpg	Train						Train						Train							U2 test	U2 test	U2 test	N	U2 test	Train
1970	/opt/ImageBase/AWS_sync/cropped/aedes/dorsalis/JHU-002124_04m.jpg	Train						Train						Train							U2 test	U2 test	U2 test	N	U2 test	Train
1971	/opt/ImageBase/AWS_sync/cropped/aedes/dorsalis/JHU-002124_05m.jpg	Train						Train						Train							U2 test	U2 test	U2 test	N	U2 test	Train
1972	/opt/ImageBase/AWS_sync/cropped/aedes/dorsalis/JHU-002128_01m.jpg	Train						Train						Train							train	train	train	N	train	Train
1973	/opt/ImageBase/AWS_sync/cropped/aedes/dorsalis/JHU-002128_05m.jpg	Train						Train						Train							train	train	train	N	train	Train
1974	/opt/ImageBase/AWS_sync/cropped/aedes/dorsalis/JHU-002128_02m.jpg	Train						Train						Train							train	train	train	N	train	Train
1975	/opt/ImageBase/AWS_sync/cropped/aedes/dorsalis/JHU-002128_04m.jpg	Train						Train						Train							train	train	train	N	train	Train
1976	/opt/ImageBase/AWS_sync/cropped/aedes/dorsalis/JHU-002128_03m.jpg	Train						Train						Train							train	train	train	N	train	Train
1977	/opt/ImageBase/AWS_sync/cropped/aedes/dorsalis/JHU-002134_02m.jpg	Train						Train	train	train	train	train	train	Train							train	U2 test	train	N	train	Train
1978	/opt/ImageBase/AWS_sync/cropped/aedes/dorsalis/JHU-002134_05m.jpg	Train						Train	train	train	train	train	train	Train							train	U2 test	train	N	train	Train
1979	/opt/ImageBase/AWS_sync/cropped/aedes/dorsalis/JHU-002134_04m.jpg	Train						Train	train	train	train	train	train	Train							train	U2 test	train	N	train	Train
1980	/opt/ImageBase/AWS_sync/cropped/aedes/dorsalis/JHU-002134_06m.jpg	Train						Train	train	train	train	train	train	Train							train	U2 test	train	N	train	Train
1981	/opt/ImageBase/AWS_sync/cropped/aedes/dorsalis/JHU-002134_01m.jpg	Train						Train	train	train	train	train	train	Train							train	U2 test	train	N	train	Train
1982	/opt/ImageBase/AWS_sync/cropped/aedes/dorsalis/JHU-002134_03m.jpg	Train						Train	train	train	train	train	train	Train							train	U2 test	train	N	train	Train
1983	/opt/ImageBase/AWS_sync/cropped/aedes/dorsalis/JHU-002099_03m.jpg	Train						Train						Train							train	U2 test	train	N	train	Train
1984	/opt/ImageBase/AWS_sync/cropped/aedes/dorsalis/JHU-002099_02m.jpg	Train						Train						Train							train	U2 test	train	N	train	Train
1985	/opt/ImageBase/AWS_sync/cropped/aedes/dorsalis/JHU-002099_05m.jpg	Train						Train						Train							train	U2 test	train	N	train	Train
1986	/opt/ImageBase/AWS_sync/cropped/aedes/dorsalis/JHU-002099_04m.jpg	Train						Train						Train							train	U2 test	train	N	train	Train
1987	/opt/ImageBase/AWS_sync/cropped/aedes/dorsalis/JHU-002099_01m.jpg	Train						Train						Train							train	U2 test	train	N	train	Train
1988	/opt/ImageBase/AWS_sync/cropped/aedes/dorsalis/JHU-002095_05m.jpg	Train						Train						Train							train	train	train	N	train	Train
1989	/opt/ImageBase/AWS_sync/cropped/aedes/dorsalis/JHU-002095_04m.jpg	Train						Train						Train							train	train	train	N	train	Train
1990	/opt/ImageBase/AWS_sync/cropped/aedes/dorsalis/JHU-002095_03m.jpg	Train						Train						Train							train	train	train	N	train	Train
1991	/opt/ImageBase/AWS_sync/cropped/aedes/dorsalis/JHU-002095_01m.jpg	Train						Train						Train							train	train	train	N	train	Train
1992	/opt/ImageBase/AWS_sync/cropped/aedes/dorsalis/JHU-002095_06m.jpg	Train						Train						Train							train	train	train	N	train	Train
1993	/opt/ImageBase/AWS_sync/cropped/aedes/dorsalis/JHU-002095_02m.jpg	Train						Train						Train							train	train	train	N	train	Train
1994	/opt/ImageBase/AWS_sync/cropped/aedes/dorsalis/JHU-001990_03m.jpg	Train						Train						Train							train	train	train	N	train	Train
1995	/opt/ImageBase/AWS_sync/cropped/aedes/dorsalis/JHU-001990_04m.jpg	Train						Train						Train							train	train	train	N	train	Train
1996	/opt/ImageBase/AWS_sync/cropped/aedes/dorsalis/JHU-001990_05m.jpg	Train						Train						Train							train	train	train	N	train	Train
1997	/opt/ImageBase/AWS_sync/cropped/aedes/dorsalis/JHU-001990_02m.jpg	Train						Train						Train							train	train	train	N	train	Train
1998	/opt/ImageBase/AWS_sync/cropped/aedes/dorsalis/JHU-001990_01m.jpg	Train						Train						Train							train	train	train	N	train	Train
[truncated: 10,978 more rows]
